# Supplementary material for: Transcriptome analysis and differentially expressed gene screening for hypoxic-ischemic brain damage in rats treated with acupuncture
Source: Research Square preprint supplement (doi:10.21203/rs.3.rs-228827/v1), 2021-02-24

**Online Data Supplement**

**Transcriptome analysis and differentially expressed gene screening for hypoxic-ischemic brain damage in rats treated with acupuncture**

# Xin Jiang 1, +, Weixun Qin2, +, Junyan Wu1, Jiang Xiao1, Yue Zhong1, Chao Yuan1, and Qing Yuan1, *

1Medical College of Acu-Moxi and Rehabilitation, Guangzhou University of Chinese Medicine, Guangzhou 511400, China

2The Fourth Department of Acupuncture and Moxibustion, Shaanxi Traditional Chinese Medicine Hospital, Xi’an, 710000, China

+these authors contributed equally to this work

*[Correspondence and requests for materials should be addressed to Q.Y.](mailto:Correspondence%20and%20requests%20for%20materials%20should%20be%20addressed%20to%20Q.Y.%20) (e-mail：yuanqing@gzucm.edu.cn)


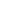

Supplement: Supplementary file 1 [file 17c7720c66f44f546275ea33.docx]
