# Supplementary material for: Transcriptome analysis and differentially expressed gene screening for hypoxic-ischemic brain damage in rats treated with acupuncture
Source: Research Square preprint supplement (doi:10.21203/rs.3.rs-228827/v1), 2021-02-24
Supplement: Supplementary file 3 [file 1b77ed1269ceea86f2ff58f7.xls]

Sample name	A22	A35	A55	A5	M16	M18	M2	M8	N10	N11	N13	N8
Total reads	119756170	101111934	106488602	94961278	120473190	126561334	103917182	109734548	102138490	92773622	100605914	92895120
Total mapped	113174544 (94.5%)	96243715 (95.19%)	101702428 (95.51%)	89779013 (94.54%)	114512268 (95.05%)	120729794 (95.39%)	99135349 (95.4%)	104196182 (94.95%)	97586396 (95.54%)	88932336 (95.86%)	95928747 (95.35%)	88892733 (95.69%)
Multiple mapped	10522610 (8.79%)	7433681 (7.35%)	8178841 (7.68%)	7645949 (8.05%)	9434005 (7.83%)	10720833 (8.47%)	8924044 (8.59%)	9662666 (8.81%)	8306640 (8.13%)	7559396 (8.15%)	8929189 (8.88%)	7716632 (8.31%)
Uniquely mapped	102651934 (85.72%)	88810034 (87.83%)	93523587 (87.82%)	82133064 (86.49%)	105078263 (87.22%)	110008961 (86.92%)	90211305 (86.81%)	94533516 (86.15%)	89279756 (87.41%)	81372940 (87.71%)	86999558 (86.48%)	81176101 (87.38%)
Read-1	51514463 (43.02%)	44594317 (44.1%)	46888810 (44.03%)	41212563 (43.4%)	52648614 (43.7%)	55154547 (43.58%)	45211796 (43.51%)	47355261 (43.15%)	44741526 (43.8%)	40781615 (43.96%)	43741082 (43.48%)	40729989 (43.85%)
Read-2	51137471 (42.7%)	44215717 (43.73%)	46634777 (43.79%)	40920501 (43.09%)	52429649 (43.52%)	54854414 (43.34%)	44999509 (43.3%)	47178255 (42.99%)	44538230 (43.61%)	40591325 (43.75%)	43258476 (43%)	40446112 (43.54%)
Reads map to '+'	51265211 (42.81%)	44366564 (43.88%)	46720390 (43.87%)	41028499 (43.21%)	52488911 (43.57%)	54964871 (43.43%)	45066141 (43.37%)	47215753 (43.03%)	44604687 (43.67%)	40649148 (43.82%)	43460123 (43.2%)	40555667 (43.66%)
Reads map to '-'	51386723 (42.91%)	44443470 (43.95%)	46803197 (43.95%)	41104565 (43.29%)	52589352 (43.65%)	55044090 (43.49%)	45145164 (43.44%)	47317763 (43.12%)	44675069 (43.74%)	40723792 (43.9%)	43539435 (43.28%)	40620434 (43.73%)
Non-splice reads	79063226 (66.02%)	66762420 (66.03%)	67125398 (63.04%)	64872885 (68.32%)	83371538 (69.2%)	82685203 (65.33%)	66980668 (64.46%)	73228283 (66.73%)	66170164 (64.78%)	54620012 (58.87%)	58304676 (57.95%)	53976204 (58.1%)
Splice reads	23588708 (19.7%)	22047614 (21.81%)	26398189 (24.79%)	17260179 (18.18%)	21706725 (18.02%)	27323758 (21.59%)	23230637 (22.35%)	21305233 (19.42%)	23109592 (22.63%)	26752928 (28.84%)	28694882 (28.52%)	27199897 (29.28%)
Reads mapped in proper pairs	99009152 (82.68%)	86039972 (85.09%)	90760402 (85.23%)	79269434 (83.48%)	101815180 (84.51%)	106672262 (84.29%)	87525180 (84.23%)	91510588 (83.39%)	86722926 (84.91%)	79094308 (85.26%)	84317644 (83.81%)	78781940 (84.81%)
Proper-paired reads map to different chrom	0 (0%)	0 (0%)	0 (0%)	0 (0%)	0 (0%)	0 (0%)	0 (0%)	0 (0%)	0 (0%)	0 (0%)	0 (0%)	0 (0%)
