# Supplementary material for: Transcriptome analysis and differentially expressed gene screening for hypoxic-ischemic brain damage in rats treated with acupuncture
Source: Research Square preprint supplement (doi:10.21203/rs.3.rs-228827/v1), 2021-02-24
Supplement: Supplementary file 4 [file 9662dffaa2a7cf35aec3f36c.xls]

gene_id	gene_name	gene_locus	N13	A22	N11	A35	M2	N10	N8	M16	A55	M18	A5	M8
XLOC_000015	XLOC_000015	1:832546-838014	0.247582	0.0	0.148470	0.223548	0.381605	0.125076	0.426552	0.000000	0.0	0.0	0.000000	0.141417
ENSRNOG00000040300	Raet1e	1:1101965-1116926	0.000000	0.0	0.0	0.000000	0.0	0.000000	0.0	0.000000	0.0	0.0	0.000000	0.000000
ENSRNOG00000058808	RF00421	1:1115869-1115990	0.000000	0.0	0.0	0.000000	0.0	0.000000	0.0	0.000000	0.0	0.0	0.000000	0.000000
XLOC_000019	XLOC_000019	1:1138744-1144998	0.000000	0.0	0.0	0.180891	0.151552	0.000000	0.0	0.000000	0.0	0.000000	0.000000	0.284662
ENSRNOG00000061316	LOC102547056	1:1180932-1220916	0.009793	0.000000	0.007901	0.034682	0.035351	0.000000	0.027082	0.000000	0.007603	0.269723	0.000000	0.000000
ENSRNOG00000050129	AABR07000137.1	1:1390128-1392329	0.045721	0.0	0.0	0.000000	0.000000	0.0	0.0	0.000000	0.0	0.0	0.000000	0.000000
XLOC_015923	XLOC_015923	1:32973-224569	0.296670	0.299758	0.187141	0.294047	0.446146	0.715597	0.057306	0.329911	0.021328	0.294993	0.247207	0.315017
XLOC_015925	XLOC_015925	1:42728-221973	0.311654	0.264280	0.153002	0.399477	0.078045	0.228475	0.067373	0.130031	0.183905	0.214214	0.047481	0.099185
XLOC_015927	XLOC_015927	1:73045-219044	0.123247	0.742623	0.388741	0.662128	0.422677	0.630203	0.291335	1.287794	0.668828	0.616096	0.950333	0.741612
XLOC_015928	XLOC_015928	1:86877-266223	0.000000	0.584248	0.000000	0.000000	0.000000	0.282266	0.000000	0.068463	0.129350	0.335135	0.230875	0.416904
XLOC_015934	XLOC_015934	1:177505-180961	0.000000	0.357599	0.177488	0.265493	0.522486	0.452040	0.125986	0.144600	0.108279	0.080776	0.551369	0.937844
XLOC_015935	XLOC_015935	1:190204-192000	0.053481	0.445570	0.115837	0.087197	0.579814	0.280621	0.126532	0.260487	0.083319	0.075381	0.995291	0.633907
XLOC_015936	XLOC_015936	1:205923-209937	0.233972	0.479873	0.602098	0.916838	0.598726	0.665320	0.212156	0.317823	0.317954	0.325493	1.216024	0.749509
XLOC_015940	XLOC_015940	1:212772-273278	0.185177	0.183424	0.103684	0.157997	0.227782	0.247951	0.229085	0.361007	0.061603	0.183011	0.491706	0.470708
XLOC_015943	XLOC_015943	1:222918-238122	0.364244	0.321399	0.509244	0.398931	0.385692	0.541119	0.584036	0.263146	0.493515	0.586996	0.577691	0.584559
XLOC_015948	XLOC_015948	1:238208-534779	0.312210	0.702056	0.180072	1.062785	0.493917	0.382074	0.601578	1.226569	0.726397	1.005680	0.254223	0.995765
XLOC_015951	XLOC_015951	1:516214-516706	0.000000	0.383697	0.194344	0.073283	0.198461	0.000000	0.059664	0.000000	0.088232	0.117188	0.000000	0.214895
ENSRNOG00000014996	Katna1	1:1825872-1867787	2.782981	2.713690	3.571334	2.579290	2.804770	3.028845	2.918615	3.202739	2.692986	3.431218	2.716589	2.573893
ENSRNOG00000016041	Zc3h12d	1:1938419-1972918	0.024320	0.003399	0.017336	0.009506	0.070811	0.0	0.017062	0.015961	0.012657	0.015303	0.032298	0.074651
ENSRNOG00000055508	AABR07000159.3	1:1868001-1886690	0.369766	0.295699	0.263973	0.186749	0.273696	0.255897	0.319421	0.291878	0.137069	0.173800	0.127133	0.196140
ENSRNOG00000015239	Ginm1	1:1868092-1885981	4.835622	2.417880	10.661618	2.408169	2.506069	4.971378	3.358682	7.357993	3.268425	8.962035	6.671897	2.354356
ENSRNOG00000053710	AABR07000159.2	1:1888877-1889236	0.000000	0.0	0.000000	0.000000	0.0	0.0	0.000000	0.0	0.0	0.0	0.0	0.0
ENSRNOG00000015552	Ppil4	1:1897338-1929763	11.916052	8.859563	11.564980	8.608306	9.290419	11.209791	11.589698	8.553551	9.861993	8.919127	9.241250	8.112053
ENSRNOG00000029897	AABR07000156.1	1:1545134-1546169	1.606132	1.156572	1.203168	1.727944	1.768773	1.141243	1.382112	0.933040	1.071022	1.517530	1.663661	1.694118
ENSRNOG00000042852	AABR07000158.1	1:1617385-1619634	0.000000	0.000000	0.000000	0.000000	0.000000	0.000000	0.000000	0.000000	0.000000	0.000000	0.000000	0.000000
ENSRNOG00000061806	RF00421	1:1628117-1628234	0.000000	0.000000	0.000000	0.000000	0.000000	0.000000	0.000000	0.000000	0.000000	0.000000	0.000000	0.000000
XLOC_015984	XLOC_015984	1:1659744-1661323	0.221398	0.000000	0.000000	0.167603	0.136224	0.284523	0.190330	0.000000	0.190406	0.000000	0.151662	0.000000
ENSRNOG00000055877	AABR07000159.4	1:1669086-1669361	0.000000	0.000000	0.000000	0.000000	0.000000	0.000000	0.113703	0.105763	0.000000	0.000000	0.000000	0.000000
XLOC_000049	XLOC_000049	1:1671226-1675418	1.256964	2.042818	1.450099	1.873772	2.445156	2.063377	1.490338	2.131162	1.728462	1.403773	2.483328	1.746982
XLOC_000051	XLOC_000051	1:1678364-1689457	0.927025	1.282795	0.726202	1.368865	1.284340	1.398481	0.961930	1.494584	1.249180	1.125987	1.567097	1.417421
ENSRNOG00000051899	AABR07000159.1	1:1701955-1731415	8.880394	3.183105	5.553626	6.492455	3.236630	3.727239	5.147940	5.530243	4.544981	6.151788	5.384830	6.117612
ENSRNOG00000014303	Lrp11	1:1702696-1731210	72.549721	47.526608	69.299034	62.027908	62.611435	61.708202	71.982346	51.629658	65.422531	54.393173	49.051933	55.127117
ENSRNOG00000014330	Pcmt1	1:1736276-1767618	75.850983	70.885727	85.216957	87.541496	63.071842	61.223442	80.500771	82.365578	85.558662	58.328064	72.255669	72.217293
ENSRNOG00000049505	Nup43	1:1771710-1782091	2.388042	0.980154	1.635804	1.100990	2.046642	2.053215	1.806173	1.744577	1.717505	2.338005	1.076202	1.532127
ENSRNOG00000014916	Lats1	1:1784078-1817310	11.716673	8.237909	10.769064	8.948124	11.774302	10.874346	10.512565	7.486706	8.810506	11.537393	8.352719	8.198800
ENSRNOG00000016054	Tab2	1:1999596-2073896	16.403507	11.266368	15.752595	12.276559	16.271048	15.119552	16.552086	10.741585	13.384004	14.815660	12.209155	10.920048
ENSRNOG00000016381	Ust	1:2333778-2627747	9.704086	4.642595	6.024398	5.580160	9.733999	7.108416	8.792220	4.852011	5.706929	7.727403	5.702083	5.433999
XLOC_016089	XLOC_016089	1:3116496-3149274	0.113119	0.868422	0.110446	0.846482	0.404453	0.378446	0.112575	1.396021	0.367022	0.339223	1.171127	0.984451
XLOC_016093	XLOC_016093	1:3170236-3218429	0.148192	1.139413	0.122782	1.075840	0.470568	0.502118	0.127175	1.926735	0.488938	0.484625	1.537504	1.325901
ENSRNOG00000013160	Sash1	1:2782864-2846200	23.159657	17.856691	16.730368	18.431393	28.780401	17.328621	21.523722	14.744456	18.371920	36.025654	18.884607	19.286762
ENSRNOG00000052788	RF00340	1:2886222-2886353	0.000000	0.000000	0.134785	0.030328	0.135878	0.064260	0.000000	0.000000	0.073441	0.051350	0.093604	0.025097
XLOC_000101	XLOC_000101	1:3009825-3042764	0.000000	0.023400	0.000000	0.071584	0.336256	0.102265	0.023850	0.000000	0.000000	1.100247	0.000000	0.015847
XLOC_016097	XLOC_016097	1:3310142-3347086	0.122312	1.183699	0.076646	1.093073	0.512820	0.515966	0.115444	1.961600	0.541854	0.506544	1.585706	1.388352
XLOC_016094	XLOC_016094	1:3218506-3307906	0.165439	1.143853	0.100186	2.108936	0.313594	0.425208	0.129904	3.183765	0.487638	0.863813	1.458230	2.355941
XLOC_016095	XLOC_016095	1:3228232-3273311	0.129733	1.340049	0.096732	1.190865	0.443369	0.486192	0.096290	1.619328	0.503346	0.449949	1.641255	1.492227
XLOC_016146	XLOC_016146	1:3769502-3804305	1.017473	1.109579	0.682976	0.981317	1.253156	0.995902	0.973486	1.202873	0.950982	0.914794	1.265520	0.871768
XLOC_000290	XLOC_000290	1:3769502-3773445	0.502118	0.188353	0.606700	0.344576	0.564838	0.362468	0.602818	0.330889	0.342900	0.407204	0.281291	0.140931
XLOC_016110	XLOC_016110	1:3466513-3467681	0.051965	0.536030	0.084987	0.481653	0.350582	0.104628	0.027742	0.879519	0.309930	0.112838	0.879859	0.479791
XLOC_016123	XLOC_016123	1:3517090-3555393	0.127456	1.032602	0.113448	0.996273	0.454670	0.409487	0.120067	2.152781	0.451503	0.482951	1.456886	1.323913
XLOC_016126	XLOC_016126	1:3565832-3662228	0.249275	1.408635	0.161792	1.866082	0.986850	0.713210	0.162401	3.981086	0.689714	1.024894	2.798455	1.819579
XLOC_016128	XLOC_016128	1:3577936-3601310	0.100284	0.839660	0.088053	0.966988	0.447441	0.388972	0.062455	1.783190	0.381805	0.390645	1.182065	1.069019
XLOC_016131	XLOC_016131	1:3608969-3613105	0.119571	0.834299	0.105190	0.898876	0.392674	0.482000	0.146584	1.646375	0.443111	0.394708	0.922197	0.830255
XLOC_016138	XLOC_016138	1:3683311-3687768	0.158135	0.944700	0.129962	1.079172	0.516882	0.468302	0.108624	1.816976	0.421983	0.468491	1.359377	1.309541
ENSRNOG00000023549	Samd5	1:3711859-3763392	8.132672	6.816124	6.200562	9.966785	8.123035	6.058683	9.190965	11.328920	7.809210	6.998262	8.793387	10.284725
XLOC_000324	XLOC_000324	1:4109335-4230350	0.065803	0.000000	0.130258	0.310853	0.000000	0.000000	0.000000	0.169100	0.000000	0.000000	0.000000	0.370366
ENSRNOG00000042741	Adgb	1:4445027-4560789	0.448838	0.166048	0.188775	0.220838	0.550535	0.342998	0.449510	0.330085	0.039721	0.129183	0.294023	0.114284
XLOC_016172	XLOC_016172	1:4567773-4611424	0.251622	0.227938	0.000000	0.215320	0.736386	0.000000	0.196732	0.000000	0.000000	0.0	0.329058	0.0
ENSRNOG00000014258	Rab32	1:4637491-4653210	0.930888	0.744691	1.216085	0.879184	0.912313	1.022119	0.887695	0.577978	1.007172	1.487220	0.693761	0.674721
ENSRNOG00000013351	Stxbp5	1:3858909-4011511	35.813362	32.966785	41.427013	40.166035	32.591248	41.714600	35.833717	37.722126	40.788887	32.422153	30.567633	33.770542
ENSRNOG00000061755	RF00340	1:3952552-3952682	0.317140	1.855895	0.098997	1.431779	0.611047	0.604341	0.000000	1.484980	0.521162	0.698514	0.704796	1.488640
XLOC_000404	XLOC_000404	1:5210630-5212367	0.080027	0.117115	0.096151	0.031880	0.000000	0.122489	0.000000	0.194366	0.083677	0.121990	0.329761	0.061348
ENSRNOG00000014431	AABR07000222.1	1:5238340-5238900	3.192211	4.188905	5.372283	5.033735	2.796696	3.356251	4.358965	2.854914	3.229761	2.398507	2.204621	2.634864
ENSRNOG00000014290	Grm1	1:4679898-5165859	8.798101	6.637181	7.796521	6.486165	12.057313	8.018942	8.700647	6.735224	7.203499	14.471475	7.079367	6.162208
ENSRNOG00000057302	RF00560	1:4731937-4732067	0.000000	0.000000	0.000000	0.000000	0.000000	0.000000	0.000000	0.000000	0.000000	0.000000	0.000000	0.000000
XLOC_016207	XLOC_016207	1:5348268-5349344	0.275472	0.000000	0.0	0.0	0.0	0.0	0.0	0.000000	0.000000	0.0	0.0	0.000000
ENSRNOG00000014450	Shprh	1:5240180-5313054	10.737586	12.676867	10.576068	13.036350	12.032780	11.443796	10.799603	12.945531	11.959674	13.460067	11.660900	11.215294
ENSRNOG00000040242	Epm2a	1:5448958-5571512	9.472684	8.145237	10.076906	8.076816	8.255796	9.344891	9.096223	7.458591	10.010766	8.030431	10.250389	9.392565
ENSRNOG00000054906	RF00560	1:5740144-5740273	0.000000	0.0	0.0	0.0	0.0	0.0	0.0	0.0	0.0	0.0	0.0	0.0
XLOC_000462	XLOC_000462	1:5753659-5792167	0.000000	0.613134	0.227817	0.270285	0.245016	0.178253	0.000000	0.896929	0.119777	0.405165	0.792089	0.674684
XLOC_016255	XLOC_016255	1:6269093-6269742	0.254914	0.000000	0.0	0.0	0.046370	0.0	0.0	0.0	0.0	0.000000	0.000000	0.058107
XLOC_016283	XLOC_016283	1:6421178-6426148	0.000000	0.326831	0.162220	0.107498	0.000000	0.155965	0.016106	0.0	0.047477	0.000000	0.135082	0.046172
XLOC_016304	XLOC_016304	1:7017432-7019132	0.190894	0.146873	0.082083	0.056015	0.359928	0.159835	0.138894	0.234018	0.036279	0.552202	0.187960	0.192833
XLOC_016308	XLOC_016308	1:7065361-7066006	0.181569	0.000000	0.262477	0.0	0.0	0.000000	0.0	0.131895	0.000000	0.0	0.000000	0.186372
ENSRNOG00000014902	Stx11	1:7039162-7064870	0.214475	0.415644	0.359605	0.153771	0.284807	0.260456	0.171646	0.136644	0.187125	0.526728	0.442824	0.305362
ENSRNOG00000014908	Sf3b5	1:7101715-7102426	25.567423	14.792281	23.178938	16.240633	18.859697	20.612761	21.685440	15.184261	17.583715	21.606897	14.493618	15.427810
XLOC_016340	XLOC_016340	1:7219569-7243969	0.000000	0.000000	0.000000	0.000000	0.000000	0.234525	0.000000	0.000000	0.000000	0.379485	0.000000	0.321005
ENSRNOG00000025587	Plagl1	1:7252349-7259035	2.018055	0.722417	1.257716	1.570748	1.904699	1.312518	1.274015	0.876915	0.889782	2.909438	1.567533	1.027492
ENSRNOG00000015217	Ltv1	1:7323040-7335936	6.233008	4.881465	5.442399	5.348879	5.406645	5.508248	5.524685	5.213860	4.960490	5.946006	4.668779	4.484459
ENSRNOG00000011058	Utrn	1:6451810-6970040	13.576456	14.437297	12.776625	11.232808	15.646474	13.163048	13.911685	10.359538	13.533331	15.208017	14.397391	12.855482
XLOC_016346	XLOC_016346	1:7541592-7544345	0.045348	0.029421	0.042717	0.032164	0.277998	0.122466	0.000000	0.061387	0.022485	0.442951	0.022647	0.025173
ENSRNOG00000015551	Fuca2	1:7658890-7673683	12.078156	8.747603	11.131406	8.180790	8.567192	9.752775	10.960951	5.400044	8.614596	6.689823	8.155169	7.505105
ENSRNOG00000015660	Pex3	1:7685338-7726401	10.406521	7.713447	8.810556	8.659364	9.023888	8.765303	10.226702	7.196219	9.066335	8.559333	7.747767	6.046356
ENSRNOG00000046983	Adat2	1:7685468-7745840	3.031916	2.111964	3.256200	2.375353	2.407930	2.674857	2.641870	2.280769	3.057371	2.502255	2.340107	2.251757
ENSRNOG00000016624	AABR07000276.1	1:7800941-7801438	0.000000	0.129527	0.201069	0.102776	0.000000	0.0	0.119489	0.0	0.000000	0.089514	0.080650	0.115883
ENSRNOG00000010753	Aig1	1:7816838-8038665	29.055557	24.041298	28.539999	26.897303	29.828032	25.857929	28.774429	25.184368	24.570175	32.114166	21.733490	24.345802
ENSRNOG00000011399	AABR07000292.1	1:8465333-8466091	0.094510	0.078553	0.181850	0.226021	0.290719	0.203368	0.122657	0.248297	0.249469	0.395456	0.138281	0.087148
XLOC_000579	XLOC_000579	1:8504025-8506034	0.120626	0.350454	0.408265	0.506499	0.408076	0.396316	0.160792	0.341338	0.352482	0.104718	0.337800	0.421828
XLOC_016493	XLOC_016493	1:8504471-8505752	0.130174	0.000000	0.000000	0.168685	0.000000	0.291333	0.000000	0.000000	0.088651	0.048554	0.000000	0.000000
XLOC_016390	XLOC_016390	1:8125270-8155848	0.823476	1.071452	0.748760	1.503570	1.035224	1.397634	0.852222	1.131117	0.978965	0.891328	0.823137	0.288960
XLOC_000533	XLOC_000533	1:8127553-8266311	5.066302	11.971239	6.098960	10.244006	6.786936	9.541888	4.649614	11.965936	7.275089	6.938178	8.521634	9.259557
XLOC_016409	XLOC_016409	1:8163096-8191996	0.000000	0.082558	0.000000	0.117721	0.000000	0.000000	0.347647	0.029562	0.000000	0.000000	0.000000	0.000000
XLOC_016411	XLOC_016411	1:8164389-8185819	0.149943	0.128976	0.000000	0.000000	0.166628	0.000000	0.000000	0.106814	0.075962	0.000000	0.100584	0.101377
XLOC_000537	XLOC_000537	1:8190991-8196638	0.221575	1.628652	0.190010	1.108043	0.780994	0.993490	0.117848	2.484827	0.514507	1.282540	1.223058	1.334128
XLOC_000540	XLOC_000540	1:8204896-8211132	0.208764	1.408638	0.170352	1.239656	0.905858	0.952987	0.145264	1.700833	0.608595	0.914806	1.099931	1.113446
XLOC_000541	XLOC_000541	1:8211315-8212610	0.316141	0.867206	0.055887	0.947595	0.385420	0.533448	0.079824	0.891415	0.338521	0.717887	0.670754	0.705143
XLOC_000547	XLOC_000547	1:8227998-8229222	0.251104	0.079711	0.000000	0.376380	0.345475	0.260894	0.000000	0.134596	0.382283	0.174729	0.377275	0.123260
XLOC_000548	XLOC_000548	1:8229652-8234162	0.119286	0.854601	0.066297	0.654778	0.372596	0.526303	0.045051	1.315443	0.473390	0.805101	0.636704	0.756335
ENSRNOG00000011015	Hivep2	1:8310577-8333885	43.519997	56.927361	62.027199	72.026901	49.025375	54.811764	53.499367	61.659695	68.856934	49.569958	55.166908	57.689114
ENSRNOG00000011540	Vta1	1:8830411-8878244	36.058605	23.214802	31.425419	24.981449	30.009850	30.541819	34.391769	19.643192	27.558475	26.794252	21.434483	22.395163
XLOC_000636	XLOC_000636	1:8927504-8932561	0.257654	0.102014	0.074776	0.197313	0.000000	0.168018	0.000000	0.241192	0.060906	0.208238	0.132847	0.000000
XLOC_000651	XLOC_000651	1:9512723-9975251	0.202321	0.686955	0.288020	0.875857	0.779647	0.719758	0.365343	1.380247	0.495019	0.553590	0.560587	1.550151
ENSRNOG00000059032	AABR07000325.1	1:9512738-9975251	0.046488	0.122743	0.111534	0.303730	0.058299	0.015912	0.150491	0.365855	0.067752	0.078835	0.083054	0.110288
XLOC_000789	XLOC_000789	1:9853414-9854461	0.000000	0.092594	0.017732	0.101492	0.065179	0.058715	0.024651	0.295998	0.062897	0.037296	0.082123	0.159739
XLOC_000832	XLOC_000832	1:9977956-9978930	0.000000	0.027554	0.0	0.033012	0.038090	0.053070	0.0	0.037058	0.104164	0.000000	0.046245	0.302151
XLOC_000846	XLOC_000846	1:10033212-10034150	0.000000	0.000000	0.0	0.153314	0.000000	0.374659	0.0	0.0	0.133268	0.090160	0.248172	0.000000
XLOC_016577	XLOC_016577	1:10610342-10736287	0.830694	0.027827	0.295117	0.046850	0.919808	0.722992	0.459574	0.100992	0.054589	0.896945	0.109701	0.154185
XLOC_000886	XLOC_000886	1:10629253-10675013	0.101911	0.000000	0.000000	0.000000	0.379897	0.259003	0.000000	0.000000	0.000000	0.273441	0.000000	0.000000
ENSRNOG00000059769	AABR07000356.1	1:10775639-10775765	0.000000	0.0	0.0	0.0	0.0	0.0	0.0	0.0	0.0	0.0	0.0	0.0
XLOC_000897	XLOC_000897	1:10822433-10860439	0.478910	0.0	0.0	0.000000	0.0	0.0	0.0	0.0	0.0	0.000000	0.0	0.0
ENSRNOG00000060990	AABR07000382.1	1:11766992-11772215	0.073817	3.450460	3.605047	4.105661	5.636752	3.963830	4.469122	3.524138	5.365706	3.636007	3.899191	3.449016
ENSRNOG00000058425	AABR07000385.2	1:11833991-11842414	0.439934	0.244880	0.540931	0.582027	0.587073	0.509103	0.113860	0.331261	0.708106	0.306353	0.653326	0.298707
XLOC_016664	XLOC_016664	1:12452616-12454601	0.000000	0.0	0.0	0.000000	0.000000	0.0	0.0	0.0	0.0	0.243912	0.370301	0.0
ENSRNOG00000060284	AABR07000436.1	1:12483436-12485729	0.000000	0.0	0.0	0.0	0.0	0.0	0.0	0.0	0.0	0.0	0.000000	0.0
ENSRNOG00000059898	LOC100909599	1:11982257-12059105	2.168551	2.384323	2.030372	3.381547	2.802338	2.725796	2.236748	3.192375	2.718394	3.042899	3.540551	2.954324
ENSRNOG00000062232	Mcc	1:12006660-12128845	0.507826	0.134654	0.000000	0.144639	0.000000	1.403872	0.000000	0.340623	0.491061	0.458404	0.640512	0.000000
ENSRNOG00000055972	AC128394.1	1:12906899-12908181	0.020904	0.006517	0.010024	0.005506	0.038573	0.025141	0.037001	0.007850	0.020353	0.017610	0.019049	0.015733
ENSRNOG00000060021	Txlnb	1:12915734-12961670	0.032068	0.176017	0.188224	0.078089	0.073484	0.100059	0.092856	0.142626	0.155557	0.072148	0.079871	0.094003
ENSRNOG00000060610	AABR07071848.1	1:12952553-12952906	0.063886	0.115603	0.122500	0.229165	0.125102	0.000000	0.000000	0.183784	0.205969	0.000000	0.000000	0.273881
ENSRNOG00000056940	Cited2	1:12823363-12825786	28.536314	16.574785	25.644184	12.306432	26.802475	23.808805	25.002136	10.632232	14.346912	28.692989	15.190438	12.322300
XLOC_016735	XLOC_016735	1:13129088-13136245	0.113497	0.187491	0.039207	0.175958	0.066583	0.120113	0.171598	0.125338	0.150578	0.070118	0.153781	0.160151
ENSRNOG00000051450	Abracl	1:13165572-13175876	6.715595	8.651396	11.505841	9.462719	6.740440	8.064692	11.664721	11.793242	10.165747	7.415086	5.905527	9.435343
ENSRNOG00000060972	Heca	1:13036909-13050644	8.249431	7.311206	17.701290	7.459626	7.487482	9.667262	7.646520	13.083109	16.219738	6.769497	14.239672	6.648983
ENSRNOG00000059224	Reps1	1:13212324-13298347	8.979808	7.533093	9.190162	8.233508	6.631955	8.654058	8.895930	6.954911	6.999782	7.703926	7.595509	7.491329
ENSRNOG00000055142	Ect2l	1:13302256-13341952	0.021461	0.044368	0.012654	0.005080	0.043938	0.008012	0.024783	0.072920	0.000000	0.010337	0.089564	0.000000
ENSRNOG00000052189	AABR07000452.1	1:13344901-13382067	0.121127	0.292572	0.000000	0.089729	0.178630	0.000000	0.030204	0.049663	0.000000	0.063924	0.404044	0.050670
ENSRNOG00000053331	AABR07000451.1	1:13351242-13354315	0.000000	0.173062	0.222405	0.156853	0.000000	0.000000	0.000000	0.000000	0.196458	0.000000	0.246675	0.238102
ENSRNOG00000053347	Ccdc28a	1:13384156-13395370	8.698109	5.311770	7.506824	7.845053	6.278345	6.151164	8.064079	6.710703	8.025306	6.216324	6.697724	7.015823
ENSRNOG00000053735	Hebp2	1:13714440-13719829	1.422674	1.486015	1.438005	0.969005	1.268000	1.044081	1.056078	0.788557	1.168194	1.266053	1.379727	1.008021
ENSRNOG00000059393	RF00026	1:13471660-13705366	1.423913	0.744791	1.444511	0.917180	1.041758	1.446695	1.053294	0.745298	1.075098	1.271890	0.909132	0.883585
ENSRNOG00000060603	Nhsl1	1:13595295-13705396	7.224705	3.987917	6.359958	5.121323	6.538522	6.837243	6.130136	3.922805	5.323439	5.659840	5.046604	5.174296
ENSRNOG00000011994	Perp	1:14224393-14236846	1.313045	1.088381	1.210788	1.122466	0.721034	1.319979	1.376889	1.013800	1.329442	1.080847	0.962289	1.013225
ENSRNOG00000011460	Arfgef3	1:13838707-13915594	23.060207	36.575802	29.102274	42.868675	24.732565	25.279978	27.938637	37.694901	38.600510	25.628319	35.824722	37.516121
XLOC_016771	XLOC_016771	1:13985557-14075655	12.782212	19.416485	14.387750	20.721050	13.658572	13.745521	14.928616	18.811586	20.875204	13.491450	20.141783	19.041201
XLOC_001046	XLOC_001046	1:13985804-14075637	1.615257	4.055898	3.398754	4.344004	2.795571	2.419225	4.042674	2.950014	4.569425	3.012720	3.692718	3.914912
ENSRNOG00000054373	AABR07000484.1	1:14527716-14549472	0.000000	0.063339	0.0	0.0	0.038538	0.0	0.0	0.0	0.067812	0.0	0.0	0.0
XLOC_001069	XLOC_001069	1:14677836-14680655	0.036745	0.076955	0.271719	0.199001	0.154883	0.000000	0.158130	0.164614	0.0	0.152217	0.344223	0.093317
ENSRNOG00000049517	Tnfaip3	1:14402913-14412807	2.609831	2.002186	4.060540	4.214155	2.133703	2.586222	2.610324	4.202201	3.668148	1.892543	1.988119	2.613138
ENSRNOG00000012322	Pex7	1:15311770-15374850	4.497830	3.307591	3.208889	3.195612	4.417994	3.166929	4.032436	3.115123	3.740233	3.148693	2.582027	3.201885
ENSRNOG00000012074	Ifngr1	1:15062432-15080907	20.349873	16.077196	19.333523	14.589756	21.002821	17.484554	21.452835	13.691512	17.514755	21.665833	18.191854	15.090021
ENSRNOG00000012259	Il22ra2	1:15093599-15106954	0.093700	0.185644	0.012836	0.103609	0.066913	0.059498	0.043156	0.194656	0.091257	0.135531	0.156885	0.058166
ENSRNOG00000012286	Il20ra	1:15180328-15222785	0.100316	0.000000	0.000000	0.024752	0.064177	0.032985	0.052238	0.031297	0.0	0.246496	0.019725	0.031864
ENSRNOG00000012311	Slc35d3	1:15298526-15301998	5.678966	1.140535	2.366632	2.527010	7.973454	3.061453	5.139726	0.274945	1.060295	8.260552	0.967515	0.979986
ENSRNOG00000054452	RF00406	1:15410123-15547618	0.172970	0.569459	0.601228	0.159699	0.194204	0.176199	0.480328	0.626320	0.619147	0.577220	0.146788	0.176199
ENSRNOG00000012701	Map7	1:15620653-15748203	13.362124	14.827268	12.788371	6.174403	14.439346	13.180073	13.197146	5.703727	7.568119	10.623393	15.328611	10.498386
ENSRNOG00000053505	RF00026	1:15778173-15778279	0.000000	0.0	0.0	0.0	0.0	0.0	0.0	0.0	0.000000	0.000000	0.0	0.0
ENSRNOG00000058050	Mtfr2	1:15782477-15860624	38.680607	30.138174	35.430759	29.382372	33.776562	36.429291	36.547699	32.612064	29.576553	37.024433	31.865629	25.348577
ENSRNOG00000013436	Pde7b	1:15893533-16203909	22.134300	17.335154	12.389911	10.020777	24.041378	15.053314	31.336790	8.282750	15.987175	13.354430	17.028534	10.899716
XLOC_016957	XLOC_016957	1:16276271-16291707	1.269881	0.838645	0.662631	0.404152	0.885894	0.836548	1.066719	0.429086	0.578858	0.305956	0.648734	0.784708
ENSRNOG00000047746	AABR07000398.1	1:11904346-11973053	204.625229	355.354065	200.967026	106.184647	331.931122	235.037781	188.027466	417.454102	223.593506	152.803101	352.748749	453.784973
XLOC_016626	XLOC_016626	1:11907763-11915484	3.618922	26.916508	10.369305	15.162854	12.536104	14.932281	41.407139	0.000000	20.404156	15.137831	19.203430	0.000000
ENSRNOG00000052007	RF01518	1:11907763-11972239	124.485756	144.891296	68.223656	78.003220	218.637451	107.867012	119.317307	306.241730	121.346107	84.360535	139.767776	149.314117
XLOC_000961	XLOC_000961	1:11907783-11915484	5.794306	24.781292	11.232409	9.145123	14.193603	8.445204	13.122602	13.828600	9.571774	7.785074	13.866231	18.464087
ENSRNOG00000061685	RF01518	1:11962750-11962836	0.011540	0.018938	0.038623	0.053380	0.031900	0.022935	0.000000	0.032580	0.026948	0.000000	0.049066	0.048514
ENSRNOG00000053888	RF00002	1:11970092-11970244	0.022827	0.023318	0.018442	0.021243	0.021299	0.026962	0.022460	0.018609	0.025441	0.013532	0.031051	0.023352
ENSRNOG00000013969	Ahi1	1:16478127-16601769	66.114952	30.800467	26.938919	26.505527	45.996704	39.790585	52.829304	26.509819	25.771955	38.540279	31.339952	23.539158
ENSRNOG00000014907	Aldh8a1	1:16910069-16930481	0.022091	0.031223	0.031304	0.093213	0.012315	0.037699	0.034985	0.037781	0.093456	0.072290	0.083105	0.012283
XLOC_016990	XLOC_016990	1:17028353-17036574	0.000000	0.000000	0.153569	0.000000	0.177509	0.501479	0.209567	0.000000	0.119670	0.000000	0.417683	0.000000
XLOC_001207	XLOC_001207	1:17028378-17041950	1.354777	1.112631	0.621198	1.696312	1.010744	1.766915	1.853415	0.479246	0.770718	0.927589	0.567271	0.912526
ENSRNOG00000014979	Themis	1:17171631-17378047	0.060340	0.0	0.0	0.000000	0.0	0.030901	0.028677	0.014715	0.041186	0.012861	0.036294	0.045256
ENSRNOG00000014531	Hbs1l	1:16819069-16896219	19.263758	18.998173	20.424011	23.652575	17.263565	17.744543	19.812832	18.674452	21.552168	20.390734	18.535227	17.889229
ENSRNOG00000046617	LOC103690149	1:17445073-18059130	4.747619	2.890012	3.999283	5.477985	3.976099	3.756138	3.435561	4.902743	4.408791	3.447900	5.857972	4.424730
ENSRNOG00000047605	Ptprk	1:17446417-18058055	11.159006	17.695354	17.507601	21.679472	12.875998	14.653336	13.148719	19.191422	17.859583	14.616995	15.696639	17.745863
ENSRNOG00000046438	AABR07000583.1	1:18491315-18836625	0.234309	0.106107	0.245699	0.067023	0.200352	0.151159	0.141917	0.141068	0.139915	0.497370	0.125410	0.048765
ENSRNOG00000011134	Lama2	1:18491384-19143269	2.498662	1.331102	1.819679	1.640187	2.258358	1.843639	1.817059	1.146021	1.603051	3.986487	1.418840	1.270338
ENSRNOG00000057281	RF00026	1:18578036-18578142	0.000000	0.165529	0.000000	0.067124	0.000000	0.000000	0.000000	0.000000	0.310355	0.205879	0.000000	0.067081
ENSRNOG00000051380	LOC102554576	1:19638106-19640329	0.000000	0.236436	0.219542	0.279837	0.252595	0.291509	0.132784	0.256526	0.187746	0.597888	0.764328	0.456583
XLOC_001242	XLOC_001242	1:19908762-19932789	0.000000	0.083493	0.000000	0.095467	0.088572	0.086199	0.000000	0.000000	0.161664	0.337128	0.103484	0.126542
XLOC_017039	XLOC_017039	1:19908818-19932799	0.092249	0.665519	0.297717	0.262376	0.364609	0.000000	0.000000	0.308183	0.184008	0.000000	0.547299	0.315929
ENSRNOG00000011245	Arhgap18	1:19227121-19376301	2.622400	2.178038	1.353025	1.558317	3.072119	2.677060	2.075817	2.103355	1.603507	2.894651	2.916233	2.355427
ENSRNOG00000011720	L3mbtl3	1:20022793-20097099	5.821681	5.075112	6.157784	5.839290	6.338907	5.483797	5.207914	5.123130	5.681419	5.945589	4.836767	5.093534
ENSRNOG00000050801	AABR07000629.3	1:20238386-20243910	0.009109	0.025488	0.0	0.006873	0.020144	0.007914	0.000000	0.000000	0.008027	0.026599	0.000000	0.0
ENSRNOG00000033517	LOC100360791	1:20115995-20116513	10.604630	49.184792	8.527171	5.416135	7.558825	7.195130	57.710663	4.658599	6.333273	10.243449	6.398522	6.193203
ENSRNOG00000039955	Samd3	1:20125966-20155960	0.339679	0.0	0.112020	0.043129	0.433809	0.464969	0.087132	0.0	0.000000	0.542132	0.0	0.019791
ENSRNOG00000049569	AABR07000629.2	1:20330419-20412264	0.664745	0.645675	0.964290	0.760973	0.389724	0.635022	0.703553	0.738338	0.852850	0.374160	0.746071	0.757496
ENSRNOG00000047783	Tmem200a	1:20331976-20412381	5.467075	7.186676	8.448869	9.052065	4.570152	6.650367	6.373633	9.034166	9.464972	4.913621	7.049814	7.356416
ENSRNOG00000011855	AABR07000629.1	1:20332371-20332844	0.000000	0.000000	0.000000	0.000000	0.000000	0.000000	0.000000	0.000000	0.000000	0.000000	0.000000	0.000000
ENSRNOG00000053931	RF00548	1:20388991-20389124	0.000000	0.278953	0.090382	0.140588	0.290834	0.248141	0.000000	0.229898	0.365574	0.070255	0.216838	0.081583
ENSRNOG00000026462	RGD1559962	1:20417008-20417637	0.063217	0.266589	0.302254	0.100631	0.073283	0.151695	0.124282	0.220900	0.118518	0.100741	0.071660	0.150302
XLOC_017077	XLOC_017077	1:20453521-20552481	0.000000	0.310782	0.000000	0.000000	0.000000	0.148840	0.000000	0.000000	0.000000	0.000000	0.000000	0.000000
XLOC_001289	XLOC_001289	1:20456138-20625940	1.044210	1.190255	1.315745	0.917472	0.848261	1.321821	0.978872	1.117495	0.853785	0.448857	0.978577	0.926971
XLOC_017079	XLOC_017079	1:20475080-20482121	0.000000	0.000000	0.000000	0.000000	0.000000	0.000000	0.000000	0.000000	0.000000	0.000000	0.000000	0.283143
XLOC_001293	XLOC_001293	1:20475301-20482331	0.000000	0.000000	0.000000	0.050353	0.000000	0.000000	0.000000	0.000000	0.000000	0.000000	0.082025	0.297110
XLOC_001294	XLOC_001294	1:20482784-20493386	0.184616	0.168056	0.339626	0.383257	0.037909	0.206684	0.126752	0.215636	0.236079	0.084116	0.097603	0.103311
XLOC_017098	XLOC_017098	1:20532199-20538030	0.000000	0.076571	0.000000	0.000000	0.000000	0.000000	0.000000	0.050854	0.000000	0.000000	0.000000	0.377524
ENSRNOG00000056218	AABR07000639.1	1:20729300-20737305	0.356821	0.284971	0.235360	0.234837	0.251543	0.093213	0.132733	0.166306	0.150729	0.134660	0.156790	0.328446
XLOC_001358	XLOC_001358	1:20834088-20835413	0.000000	0.000000	0.064307	0.070645	0.0	0.133343	0.188922	0.0	0.030939	0.0	0.264765	0.033128
ENSRNOG00000047821	Smlr1	1:20856187-20877716	0.000000	0.000000	0.0	0.0	0.000000	0.0	0.000000	0.0	0.0	0.0	0.0	0.0
ENSRNOG00000012346	Epb41l2	1:20893995-20962526	25.642765	24.660187	22.688644	23.067814	25.449717	21.625736	24.905602	17.136749	23.014286	24.334654	27.354565	23.846724
XLOC_017131	XLOC_017131	1:21031009-21048885	0.166943	0.804003	0.133674	0.805349	0.517799	0.539692	0.118538	1.044445	0.511546	0.555326	1.064183	0.668794
XLOC_001436	XLOC_001436	1:21391966-21399857	0.015632	0.031937	0.197988	0.323709	0.058108	0.132825	0.018527	0.238350	0.376086	0.103053	0.386986	0.000000
ENSRNOG00000013304	Arg1	1:21525421-21537863	2.469109	1.073256	2.515468	1.084389	2.945891	3.130318	2.931948	1.021634	1.192711	2.629548	1.192898	1.289725
ENSRNOG00000055111	AABR07000658.1	1:21142142-21265675	0.558843	0.280676	0.580109	0.455601	0.223275	0.664702	0.566363	0.283639	0.075148	0.602400	0.170562	0.217589
ENSRNOG00000054921	RF00560	1:21165673-21165796	0.005624	0.050657	0.110636	0.084508	0.287503	0.111274	0.000000	0.065150	0.000000	0.130583	0.000000	0.068571
ENSRNOG00000013791	Enpp3	1:21613148-21684480	0.529436	0.171851	0.251606	0.399856	0.248199	0.255351	0.323521	0.299731	0.194470	0.283541	0.133310	0.305843
ENSRNOG00000013422	Med23	1:21539765-21586910	5.964298	5.198699	6.534348	6.731741	6.613787	6.857999	5.378156	6.263610	5.849136	7.415141	6.127214	5.361285
ENSRNOG00000013994	Enpp1	1:21748261-21813371	1.308937	1.177306	1.295188	1.397519	2.030740	1.328820	1.056736	0.884633	1.185068	3.764448	1.405163	1.229450
XLOC_001530	XLOC_001530	1:21987681-21991634	0.091238	0.047308	0.000000	0.108186	0.171092	0.219961	0.066323	0.218337	0.092470	0.087289	0.442263	0.063784
ENSRNOG00000015036	Ccn2	1:21851660-21854773	8.457760	10.911613	9.369427	6.588815	11.347690	9.108942	10.475444	6.399605	6.087148	15.411719	9.487542	7.831991
XLOC_001562	XLOC_001562	1:22281923-22288678	0.326633	0.196454	0.229686	0.171003	0.345877	0.286848	0.203377	0.207828	0.145839	0.302291	0.114007	0.140665
ENSRNOG00000039865	Vnn3	1:22649081-22661377	0.000000	0.0	0.0	0.010073	0.000000	0.0	0.0	0.000000	0.0	0.0	0.0	0.000000
ENSRNOG00000016219	Vnn1	1:22614783-22625204	0.120958	0.049789	0.104099	0.0	0.135878	0.108933	0.056767	0.039232	0.103116	0.045528	0.081378	0.0
ENSRNOG00000015321	Moxd1	1:22124495-22206505	3.457259	3.796947	3.711067	4.357538	4.046117	4.202736	4.788185	4.829043	5.401255	3.561042	5.366228	5.329211
ENSRNOG00000015670	Stx7	1:22241661-22281788	29.622391	26.860149	36.920456	24.652853	31.849699	32.783989	32.445896	32.479679	30.747433	33.181805	19.941912	27.102316
ENSRNOG00000060376	LOC100910237	1:22757012-22758012	0.333355	0.237420	0.385737	0.045122	1.111620	0.522076	0.206449	0.311424	1.015291	0.628721	0.415132	0.303738
ENSRNOG00000016371	Slc18b1	1:22705916-22748422	7.273946	3.986547	5.562580	4.312062	6.482139	6.077856	7.425502	3.588072	4.827064	5.136951	3.834684	4.403628
XLOC_001603	XLOC_001603	1:22799374-22809030	0.120425	0.0	0.0	0.000000	0.339670	0.0	0.076425	0.313731	0.000000	0.000000	0.000000	0.105601
ENSRNOG00000016411	Rps12	1:22758212-22760370	52.965458	38.559307	57.467911	31.592451	18.031281	47.084740	55.701706	19.651443	38.518688	60.301437	21.648605	17.436283
ENSRNOG00000057952	RF00186	1:22758917-22758990	1.288445	0.937901	0.703900	1.439953	1.360003	0.741251	0.717675	1.075689	0.925385	3.021428	1.416484	1.104257
ENSRNOG00000061678	RF00609	1:22759629-22759703	0.539325	0.641186	0.533033	1.441163	1.051057	1.847269	0.167930	1.276776	1.100057	1.349359	1.569582	0.403422
ENSRNOG00000054517	RF00438	1:22759963-22760089	2.707241	0.401356	0.548550	0.957697	1.278021	0.658997	0.110741	1.128882	0.526208	1.332804	0.789003	0.000000
XLOC_001618	XLOC_001618	1:23244717-23247250	0.048285	0.349181	0.089669	0.133615	0.194343	0.098344	0.061123	0.211285	0.171931	0.068856	0.228397	0.208141
XLOC_001619	XLOC_001619	1:23261160-23261726	0.137419	0.030300	0.000000	0.132906	0.000000	0.000000	0.000000	0.132653	0.075111	0.000000	0.420128	0.124134
XLOC_001620	XLOC_001620	1:23267423-23268595	0.122850	0.338390	0.000000	0.498053	0.090437	0.232970	0.027332	0.348437	0.277851	0.127412	0.437388	0.120107
ENSRNOG00000048248	LOC100910446	1:23543426-23556241	35.843517	16.761566	23.933487	32.554157	19.786968	20.327333	26.962866	15.246485	20.923315	20.501986	23.973597	15.626690
ENSRNOG00000011114	Tbpl1	1:23977688-24002506	28.622883	19.684278	28.543955	22.566586	25.066128	27.122059	26.470499	23.784197	23.467987	25.138220	19.858057	21.728712
ENSRNOG00000011161	Slc2a12	1:24003625-24056373	3.029369	0.995434	0.936208	0.970700	2.698907	2.006708	1.772497	0.501246	1.417002	2.246476	1.409106	0.825699
ENSRNOG00000011815	Sgk1	1:24185435-24302298	34.509930	38.798653	41.694271	16.411840	66.302971	28.253128	87.397133	17.121138	41.414768	41.253914	37.945667	18.612661
ENSRNOG00000059690	RF00603	1:24215596-24316701	1.041923	1.180659	0.634559	0.576757	0.881276	0.878066	0.970134	0.683080	1.676279	0.604251	0.357637	0.645650
XLOC_017274	XLOC_017274	1:24308449-24311126	0.000000	0.000000	0.000000	0.000000	0.000000	0.000000	0.000000	0.000000	0.000000	0.370582	0.000000	0.000000
ENSRNOG00000048976	AABR07000740.2	1:24852271-25025301	0.866266	0.005946	0.227359	0.023414	7.415613	4.432735	0.178043	1.213630	1.211109	2.391810	6.494261	3.801850
XLOC_001690	XLOC_001690	1:24861163-24865942	0.095877	0.000000	0.000000	0.000000	0.695561	0.315634	0.000000	0.189740	0.433234	0.484296	0.793263	0.432000
XLOC_001688	XLOC_001688	1:24925318-24962832	0.164048	0.000000	0.013518	0.000000	2.005393	1.484480	0.000000	0.769400	0.435583	1.228907	2.533192	1.664199
XLOC_001698	XLOC_001698	1:24926704-24931851	0.067741	0.000000	0.000000	0.000000	0.317843	0.152601	0.075328	0.148429	0.058720	0.046845	0.098579	0.140547
XLOC_001699	XLOC_001699	1:24928141-24933908	0.077012	0.029905	0.000000	0.034194	0.797407	0.315372	0.000000	0.319598	0.160636	0.364581	0.855211	0.506697
XLOC_001701	XLOC_001701	1:24942620-24945515	0.019333	0.000000	0.000000	0.000000	0.356065	0.021947	0.000000	0.050165	0.115757	0.325049	0.443690	0.166912
XLOC_001686	XLOC_001686	1:24970909-25028400	0.714939	0.051446	0.176955	0.000000	1.174489	1.409325	0.097817	0.500374	0.142448	1.330570	2.007673	1.315219
XLOC_017320	XLOC_017320	1:24970937-24976795	0.313204	0.022446	0.027928	0.000000	0.329357	0.323413	0.004625	0.000000	0.018148	0.117240	0.326439	0.057142
XLOC_017334	XLOC_017334	1:24979857-24980336	0.000000	0.000000	0.000000	0.000000	0.096622	0.000000	0.000000	0.000000	0.000000	0.000000	0.000000	0.281860
XLOC_001706	XLOC_001706	1:24998107-25012737	0.575043	0.239016	0.329339	0.114313	1.238122	0.832727	0.329305	0.107617	0.124657	0.993432	0.688480	0.377377
XLOC_001709	XLOC_001709	1:25018338-25020023	0.085799	0.000000	0.000000	0.000000	0.356086	0.266892	0.000000	0.141072	0.109919	0.182407	0.546349	0.248383
ENSRNOG00000062105	AABR07000765.2	1:25172296-25300965	0.537828	0.636873	0.673647	0.535977	0.449076	0.483562	0.513246	0.468553	0.535654	0.523140	0.370903	0.445973
ENSRNOG00000012122	Clvs2	1:25173242-25296927	18.669353	21.586292	22.840002	22.581779	18.259335	19.913248	20.669287	22.053755	24.442625	21.229597	18.758991	19.277466
ENSRNOG00000062163	AABR07000765.4	1:25262796-25263797	0.000000	0.000000	0.000000	0.007638	0.000000	0.060725	0.000000	0.094600	0.018321	0.000000	0.000000	0.040556
XLOC_001750	XLOC_001750	1:27271022-27399833	0.537735	2.974327	0.538284	3.485446	2.659047	2.354812	0.445064	6.506139	1.574512	3.744704	6.162211	4.981343
XLOC_017386	XLOC_017386	1:27356551-27364346	0.000000	0.000000	0.000000	0.101217	0.000000	0.000000	0.000000	0.283459	0.000000	0.000000	0.000000	0.000000
XLOC_017433	XLOC_017433	1:28226117-28287119	0.711328	0.247202	0.426633	0.333036	0.653400	0.638496	0.709415	0.520843	0.343177	1.036053	0.269526	0.323491
ENSRNOG00000052712	RF00560	1:27540846-27540948	0.000000	0.000000	0.000000	0.000000	0.000000	0.065882	0.000000	0.000000	0.000000	0.065808	0.334829	0.052533
ENSRNOG00000057890	RF00015	1:27718090-27731260	0.445952	2.294624	0.408724	2.041631	1.664598	1.840948	0.322223	4.170253	1.001019	2.056661	3.030763	2.691319
ENSRNOG00000056670	AABR07000902.1	1:27924825-27927782	0.010487	0.133934	0.000000	0.054088	0.024435	0.100803	0.000000	0.106307	0.049937	0.009910	0.159255	0.060911
ENSRNOG00000013323	Rnf217	1:28301922-28390837	11.256851	10.586308	13.466695	17.348228	14.639270	12.349332	12.989408	13.541329	14.313564	12.590771	12.040019	12.422987
ENSRNOG00000021478	Tpd52l1	1:28454966-28576553	15.325422	10.098457	10.011569	15.424541	11.116516	11.668851	19.240383	10.549233	13.110656	6.701777	11.740184	14.317513
ENSRNOG00000021442	Hddc2	1:28579990-28600586	3.763811	2.982844	4.611713	3.410666	3.338620	3.949144	3.905158	3.806100	3.493432	3.398002	3.437963	2.666960
ENSRNOG00000041720	RF00001	1:28595961-28596073	0.000000	0.000000	0.000000	0.000000	0.000000	0.000000	0.000000	0.000000	0.078489	0.000000	0.000000	0.000000
ENSRNOG00000013364	Hey2	1:29191192-29201531	3.375569	2.696168	3.844622	2.601734	4.365943	3.616769	3.215679	2.110970	3.451065	7.286973	2.695144	2.624398
ENSRNOG00000014190	Hint3	1:29413365-29425422	6.235182	5.060768	7.345583	4.623422	4.549067	4.248961	4.641856	3.927199	4.598418	4.884655	3.874619	4.468274
ENSRNOG00000014004	Ncoa7	1:29225707-29385199	27.010283	22.136494	28.839685	28.680578	23.292229	25.524261	30.298153	27.655592	31.179861	20.552708	21.540012	24.885492
ENSRNOG00000045369	RF00001	1:29352780-29352913	0.144239	0.435719	0.081583	0.341803	0.295792	0.013504	0.018798	0.152729	0.280915	0.287342	0.093220	0.373305
ENSRNOG00000014240	Trmt11	1:29432152-29494158	1.555452	1.986235	0.943681	1.593093	1.646922	1.667361	0.937461	1.547656	1.336429	1.790817	1.499427	1.820160
XLOC_001942	XLOC_001942	1:29828173-29828977	0.074350	0.284844	0.0	0.000000	0.0	0.0	0.0	0.440504	0.230889	0.070255	0.000000	0.082407
ENSRNOG00000042944	Cenpw	1:29915443-29920598	0.156258	0.065991	0.080333	0.087442	0.176342	0.243292	0.205914	0.102769	0.084450	0.070562	0.138576	0.132635
ENSRNOG00000011568	Rspo3	1:30583305-30766860	2.624472	4.319692	5.791820	5.379405	2.905639	4.016555	4.059983	5.046078	5.135172	2.890457	3.221261	5.223917
ENSRNOG00000056484	AABR07000978.1	1:30611786-30766803	0.385480	1.065859	0.819133	0.690469	0.447193	0.687568	0.877000	0.838718	0.911499	0.473095	0.707874	0.714513
ENSRNOG00000023407	Mrpl36	1:31261370-31262466	5.890366	4.420752	7.156329	4.923265	5.441986	4.830729	6.696490	4.766076	5.236338	4.479204	4.264824	4.309332
ENSRNOG00000023387	LOC679739	1:31264755-31273159	4.068738	10.705714	0.348783	0.249098	0.573798	12.993144	5.262258	15.149041	7.472751	8.490770	9.339243	8.877131
ENSRNOG00000011588	Rnf146	1:30856905-30880774	6.017798	5.727288	6.091785	5.442978	6.184099	5.953866	6.233108	5.734401	6.403944	5.845352	6.122074	5.579871
ENSRNOG00000011622	Echdc1	1:30874418-30917882	13.784394	9.440008	12.240650	9.227837	13.620329	11.886743	12.409759	8.354491	10.403400	13.593521	9.780532	10.530869
XLOC_001992	XLOC_001992	1:30950239-30951835	0.300011	0.326218	0.000000	0.307410	0.605777	0.328370	0.000000	0.566076	0.135975	0.493244	0.368755	0.464656
ENSRNOG00000054753	AABR07000986.1	1:31000772-31004646	0.045548	0.099269	0.000000	0.060754	0.022851	0.057969	0.037260	0.066585	0.026607	0.055462	0.096963	0.068337
ENSRNOG00000042309	Kiaa0408L	1:31040142-31055453	29.091274	28.110607	31.042595	33.206059	30.482645	30.058407	31.477974	30.494963	32.249146	28.047905	30.060497	31.422625
ENSRNOG00000012324	Soga3	1:31066798-31122093	24.658188	26.275362	28.786392	29.375084	27.253183	26.586977	28.477114	27.865566	30.304630	24.831142	27.359871	28.443085
ENSRNOG00000054845	RF00560	1:31163819-31163934	0.000000	0.000000	0.000000	0.000000	0.000000	0.000000	0.000000	0.000000	0.000000	0.000000	0.000000	0.000000
ENSRNOG00000014721	Ahrr	1:31603297-31698329	0.000000	0.031892	0.034204	0.030050	0.014128	0.042715	0.080137	0.055005	0.026123	0.036100	0.077926	0.021172
ENSRNOG00000014485	Pdcd6	1:31576183-31591849	20.455059	16.829128	18.157810	15.955755	18.556250	19.192780	19.658363	14.396718	17.275280	19.063192	16.501822	15.801025
XLOC_002041	XLOC_002041	1:31494055-31519423	1.429752	0.408406	0.137257	0.247681	0.861477	0.811577	1.529379	0.403366	0.353032	0.191883	0.726835	0.191247
ENSRNOG00000039783	AC094217.1	1:31527646-31528083	18.728085	12.708386	18.238522	10.055253	18.882898	15.645838	17.975224	10.419655	9.769830	16.354588	11.101628	11.859043
ENSRNOG00000028357	Lrrc14b	1:31531143-31535314	0.273637	0.137242	0.110352	0.105000	0.070580	0.135033	0.284140	0.091331	0.175105	0.178930	0.164924	0.227419
ENSRNOG00000012775	Ccdc127	1:31539215-31545559	20.739428	11.872128	16.547682	13.921638	17.593197	15.933187	19.395168	13.570181	16.358265	14.751672	10.860212	11.844566
ENSRNOG00000013331	Sdha	1:31545631-31570601	105.628654	78.357475	103.977882	80.193840	87.092911	87.295914	104.068756	70.014534	94.557968	87.946014	68.519508	69.001083
ENSRNOG00000039776	Exoc3	1:31700953-31731815	23.825270	17.189621	20.799465	19.101936	20.590984	18.400322	23.326826	18.184526	19.803005	18.554890	15.464975	15.836123
ENSRNOG00000015159	Slc9a3	1:31734327-31777070	0.053615	0.055200	0.071141	0.027096	0.054988	0.136354	0.027274	0.065015	0.032295	0.037823	0.048113	0.094381
ENSRNOG00000015465	Cep72	1:31835000-31891431	1.373790	5.384785	2.434139	4.960508	1.666085	4.435396	2.036572	4.890327	1.697566	1.312198	4.997135	5.366406
ENSRNOG00000028261	Tppp	1:31870899-31890778	91.421799	105.341606	116.352486	115.479591	80.574127	90.408020	103.851364	112.842339	111.498734	72.052994	107.597656	120.529388
ENSRNOG00000015810	Trip13	1:31967978-32012919	0.505946	0.266209	0.500956	0.240405	0.457151	0.380129	0.389634	0.263603	0.380968	0.431425	0.333549	0.505860
ENSRNOG00000051415	RF00412	1:31978116-31978253	0.000000	0.000000	0.000000	0.000000	0.000000	0.000000	0.000000	0.000000	0.000000	0.000000	0.134793	0.000000
ENSRNOG00000039743	Zdhhc11	1:31906064-31936537	0.000000	0.050155	0.010692	0.046024	0.042179	0.000000	0.022561	0.037835	0.016826	0.035122	0.029738	0.025443
ENSRNOG00000060926	AABR07001001.1	1:31937653-31939296	0.000000	0.0	0.000000	0.0	0.0	0.0	0.000000	0.000000	0.000000	0.000000	0.000000	0.0
ENSRNOG00000015676	Brd9	1:31939585-31967915	9.422466	8.421329	9.268908	7.254317	7.131837	8.633783	8.396415	7.503915	7.684083	7.787754	9.158237	7.124230
ENSRNOG00000016103	Nkd2	1:32058044-32084877	2.044651	2.249399	1.831701	2.298418	1.377933	2.119090	1.760313	1.901588	2.049756	1.986542	2.261902	2.104480
ENSRNOG00000056712	AC142421.1	1:32179240-32207883	0.000000	0.0	0.0	0.0	0.364995	0.0	0.0	0.0	0.0	0.0	0.0	0.0
ENSRNOG00000026501	Slc6a19	1:32199810-32220045	0.000000	0.0	0.0	0.0	0.000000	0.0	0.0	0.0	0.0	0.0	0.0	0.0
ENSRNOG00000016372	Slc12a7	1:32086755-32141036	2.099789	0.774658	0.842365	1.132757	1.474939	0.965143	1.353506	0.805652	1.101417	1.878150	1.000347	0.888891
ENSRNOG00000025327	Tert	1:32250589-32272476	0.728730	0.516808	0.541390	0.777002	0.886868	0.918950	0.477853	0.562947	0.562566	0.738753	0.895369	0.488284
ENSRNOG00000017302	Slc6a3	1:32321580-32363983	0.079603	0.027476	0.066156	0.0	0.726963	0.196797	0.052087	0.0	0.0	1.093317	0.0	0.0
ENSRNOG00000016923	Clptm1l	1:32281207-32297190	33.904629	20.765345	31.610704	30.567942	28.800415	28.874043	30.980732	23.883146	29.708994	28.705357	20.634544	24.980646
ENSRNOG00000017930	Lpcat1	1:32379432-32429917	11.377193	8.908931	10.535078	11.206186	13.268818	10.204614	11.041634	9.938728	10.993584	13.506164	8.274886	10.579808
ENSRNOG00000012742	Irx2	1:33271977-33275540	0.191148	0.0	0.022113	0.0	0.069848	0.0	0.000000	0.0	0.0	0.099096	0.0	0.0
ENSRNOG00000033609	Irx1	1:33910912-33916741	0.468957	0.039521	0.178112	0.015013	0.227191	0.115751	0.307977	0.068625	0.039581	0.279212	0.104221	0.138727
ENSRNOG00000047971	LOC100910528	1:32569323-32581785	3.089044	2.155007	3.702645	2.277869	2.314838	1.945899	3.134683	1.967128	2.157823	2.184623	1.940089	2.022176
ENSRNOG00000049394	LOC100912599	1:32573228-32581781	18.102236	9.803902	18.270233	14.158019	12.310798	0.631081	16.867384	1.694110	9.126422	7.818484	10.330605	8.654181
XLOC_017742	XLOC_017742	1:35055071-35065061	0.052264	0.021758	0.055793	0.000000	0.059693	0.370813	0.106738	0.000000	0.000000	0.129848	0.066675	0.000435
ENSRNOG00000047117	AABR07001037.1	1:35151638-35157157	0.000000	0.009668	0.003857	0.024638	0.011731	0.000000	0.009129	0.034662	0.008008	0.018736	0.026250	0.000000
ENSRNOG00000017095	LOC679881	1:35868009-35869909	0.397920	0.198031	0.281218	0.321288	0.280995	0.296938	0.310296	0.492741	0.397548	0.286396	0.362560	0.350232
ENSRNOG00000055337	AABR07001054.1	1:35883694-35886326	0.000000	0.0	0.000000	0.000000	0.0	0.0	0.0	0.047650	0.000000	0.0	0.0	0.016193
ENSRNOG00000057357	AABR07001054.2	1:35922688-35996536	0.000000	0.000000	0.000000	0.000000	0.0	0.0	0.0	0.000000	0.000000	0.0	0.0	0.000000
XLOC_002143	XLOC_002143	1:36113152-36116145	0.137094	0.0	0.088699	0.077064	0.184036	0.062743	0.214038	0.117520	0.096301	0.128552	0.090456	0.140205
ENSRNOG00000017150	Med10	1:36107232-36112993	15.321853	11.918262	18.400291	16.232756	11.995000	15.541329	15.299130	15.645985	16.964376	12.175719	11.122913	12.213772
ENSRNOG00000023053	Ice1	1:35280496-35332030	5.691096	5.254372	5.197312	5.656693	5.852305	5.482105	5.793218	5.586134	5.851528	5.154434	4.922514	5.340800
ENSRNOG00000034075	Ube2ql1	1:36185916-36226276	43.835411	50.489090	71.182343	72.232063	47.629982	50.495998	53.837421	67.091301	72.690956	51.069775	48.808514	63.496357
ENSRNOG00000017254	Nsun2	1:36295650-36319966	11.615937	11.454070	14.694549	9.602654	9.609892	13.539558	13.668542	11.694514	11.848040	10.123765	8.586263	8.223307
ENSRNOG00000052644	RF00399	1:36320445-36354611	0.656782	0.622378	0.762951	0.353540	0.435637	0.647257	0.668358	0.277459	0.439797	0.630431	0.509504	0.357242
ENSRNOG00000017601	Srd5a1	1:36320461-36354756	5.802572	6.222254	5.607691	4.616060	6.120899	5.796995	6.138349	3.718711	4.822924	5.437451	5.402814	5.458033
ENSRNOG00000017613	Tent4a	1:36400443-36433238	15.331294	9.889912	14.133183	12.946001	12.698487	14.705755	12.487889	10.137584	12.066635	11.185679	9.605321	10.879078
ENSRNOG00000047406	RGD1308544	1:37702041-37726151	6.258610	6.232462	7.108559	4.175550	4.183180	5.099526	5.351414	4.985210	5.195923	4.602628	4.770912	3.893859
ENSRNOG00000055880	AABR07001061.1	1:36521299-36779849	0.044219	0.281115	0.500140	0.000000	0.000000	0.291498	0.094012	0.000000	0.042124	0.334073	0.364231	0.000000
XLOC_002196	XLOC_002196	1:36760160-36924664	1.339200	0.487936	0.583870	0.911756	1.853703	0.685840	1.030916	0.730019	1.055671	2.069495	0.846926	1.190131
XLOC_017803	XLOC_017803	1:36820816-36893566	0.000000	0.000000	0.000000	0.000000	0.000000	0.000000	0.000000	0.000000	0.000000	0.000000	0.000000	0.312526
XLOC_002300	XLOC_002300	1:36932474-36935877	0.293026	0.000000	0.0	0.213978	0.253570	0.000000	0.000000	0.000000	0.000000	0.072749	0.354751	0.000000
XLOC_017805	XLOC_017805	1:36950361-36954281	1.689711	1.470599	1.549122	1.945771	1.203948	2.266717	1.538776	1.875367	2.424320	0.877388	2.039020	2.857847
XLOC_002330	XLOC_002330	1:37358243-37368878	0.089784	0.971304	0.208249	1.331971	0.561606	0.524281	0.105474	2.101500	0.610294	0.875096	1.185138	1.059059
XLOC_017823	XLOC_017823	1:37414108-37437770	0.496431	1.597655	0.696465	2.108918	1.075649	1.282645	0.177987	3.214395	1.307749	1.551041	1.922073	1.713450
XLOC_002337	XLOC_002337	1:37495166-37504254	0.118890	0.904814	0.139826	1.154315	0.454800	0.643293	0.082998	2.046344	0.598106	0.728371	1.035061	1.055429
ENSRNOG00000032150	Adcy2	1:37507276-37698390	43.953438	35.121323	54.755264	54.070702	40.948608	44.184490	43.402729	45.421482	52.462719	39.798634	34.393188	42.841660
ENSRNOG00000055957	RF00026	1:37681259-37681365	0.000000	0.600523	0.152253	0.583208	0.538056	0.372061	0.000000	0.726821	0.570590	0.387123	0.795628	0.206403
ENSRNOG00000027422	Fastkd3	1:37734403-37749175	6.830926	4.872636	6.025480	7.185699	7.150236	6.764107	5.764333	6.667349	6.268332	6.223447	4.632130	6.163133
ENSRNOG00000017826	Mtrr	1:37743147-37774015	8.521088	5.856761	7.801448	6.152033	7.774942	7.970781	7.463872	5.503985	8.145601	6.848668	6.314058	5.732132
ENSRNOG00000042308	LOC680200	1:37802592-37863756	1.348663	1.419193	1.047712	1.120633	1.739144	1.639160	1.202126	1.937328	1.457342	1.683818	1.705598	2.113261
ENSRNOG00000058041	RF00066	1:37822932-37822996	0.000000	0.000000	0.000000	0.000000	0.000000	0.000000	0.000000	0.000000	0.000000	0.000000	0.000000	0.000000
XLOC_017829	XLOC_017829	1:37830997-37844966	0.289175	0.436395	0.252295	0.359980	0.534506	0.486752	0.201431	0.536008	0.451673	0.320062	0.552161	0.400762
XLOC_017835	XLOC_017835	1:37848396-37849959	0.304088	0.556256	0.336870	0.452376	0.658500	0.592552	0.216172	0.344832	0.309206	0.506862	0.432124	0.450974
ENSRNOG00000051377	AABR07001099.2	1:37853553-37863756	12.770851	13.517993	16.089451	13.213335	11.725371	13.653304	15.823184	13.163866	14.646094	11.417336	13.409836	11.585820
ENSRNOG00000049256	rno-mir-29b-2	1:38238376-38238459	0.371237	0.637460	0.387245	0.546660	0.457360	0.294863	0.330488	0.779648	0.187231	0.687568	1.701253	0.686217
ENSRNOG00000046712	rno-mir-3556b-1	1:38238896-38239002	0.073092	0.184295	0.495323	0.238235	0.465625	0.337709	0.083377	0.269286	0.204815	0.208959	0.756290	0.487112
XLOC_017856	XLOC_017856	1:38436701-38443369	0.171342	0.094406	0.134595	0.352586	0.412916	0.274628	0.122292	0.157464	0.000000	0.483730	0.241681	0.094954
XLOC_017859	XLOC_017859	1:38449776-38456740	0.000000	0.000000	0.0	0.000000	0.0	0.086673	0.0	0.415842	0.000000	0.002346	0.232684	0.179227
XLOC_017860	XLOC_017860	1:38454402-38459847	0.275726	0.000000	0.0	0.224188	0.0	0.132650	0.0	0.253189	0.385502	0.104216	0.032667	0.078235
ENSRNOG00000049881	AABR07001160.1	1:38473754-38486334	0.000000	0.000000	0.000000	0.000000	0.000000	0.000000	0.000000	0.377017	0.562984	0.000000	0.234100	0.235696
XLOC_017862	XLOC_017862	1:38486975-38493117	0.193199	0.000000	0.354123	0.366253	0.000000	0.393551	0.197562	0.073618	0.415936	0.119267	0.314565	0.293225
XLOC_017847	XLOC_017847	1:37976647-37981530	2.175013	1.990191	2.476112	1.559622	2.815193	2.682606	2.157210	1.962337	2.218853	2.432429	2.027652	2.122811
ENSRNOG00000056694	AABR07001100.1	1:37976647-38014293	1.578046	1.950161	2.479110	2.111383	1.459970	2.413336	1.311080	1.054934	1.188271	1.225785	1.908971	1.902913
ENSRNOG00000059310	RF00026	1:37865411-37865508	0.146394	0.000000	0.000000	0.000000	0.000000	0.000000	0.000000	0.000000	0.000000	0.000000	0.000000	0.117187
ENSRNOG00000017963	AABR07001099.1	1:37868070-37924878	2.492468	2.081598	1.734720	1.878055	2.380483	2.051987	1.912896	1.623748	2.300994	1.784022	2.194241	2.263362
ENSRNOG00000049259	LOC102549842	1:37895125-37957412	6.603618	5.118185	5.280406	5.174298	5.381166	5.911785	4.646254	3.598879	4.614368	7.708126	4.382022	5.208783
ENSRNOG00000016462	LOC102547287	1:37928102-37932084	6.885899	6.630429	5.861919	5.945041	7.000088	7.344709	6.702374	6.352595	5.641460	7.200360	6.681511	5.267740
ENSRNOG00000047145	LOC102551340	1:38525231-38543395	5.254069	5.351039	4.763009	4.290815	6.245586	5.201679	4.783860	5.566063	5.115139	6.195042	5.451958	5.384998
XLOC_002369	XLOC_002369	1:38526132-38527101	0.255804	0.135727	0.228840	0.000000	0.000000	0.120358	0.126940	0.215429	0.092392	0.285605	0.000000	0.089907
ENSRNOG00000046353	LOC501406	1:38582629-38586563	3.000512	2.197844	2.623094	2.038282	2.442206	2.595023	2.715555	2.054943	2.271263	2.747040	2.257859	1.869465
XLOC_017944	XLOC_017944	1:39260990-39262240	0.000000	0.315985	0.115629	0.000000	0.000000	0.000000	0.000000	0.000000	0.068449	0.234807	0.180235	0.128016
XLOC_002428	XLOC_002428	1:39494376-39500720	0.040475	0.197049	0.076400	0.281115	0.135749	0.152734	0.072120	0.318110	0.355149	0.138569	0.293775	0.300290
XLOC_002386	XLOC_002386	1:38668776-38712086	0.288848	1.344752	0.348604	1.261469	0.114126	0.409636	0.260818	2.065060	0.865222	0.316810	0.998342	0.796651
XLOC_002394	XLOC_002394	1:38678122-38678423	0.000000	0.809227	0.000000	0.161393	0.000000	0.000000	0.000000	0.000000	0.000000	0.000000	0.455681	0.080261
XLOC_002397	XLOC_002397	1:38680365-38681137	0.018950	0.297498	0.023165	0.413454	0.023930	0.134447	0.033423	0.634802	0.368386	0.044111	0.425721	0.427701
XLOC_002398	XLOC_002398	1:38681775-38685249	0.074331	0.511692	0.033428	0.466709	0.180004	0.175667	0.039467	0.898001	0.488966	0.226275	0.549490	0.340675
XLOC_002399	XLOC_002399	1:38698636-38699097	0.217372	0.429755	0.235249	0.171496	0.560724	0.437981	0.344585	0.375365	0.338502	0.257280	0.509479	0.393526
XLOC_017902	XLOC_017902	1:38800923-38806937	0.236624	1.161653	0.095627	0.449712	0.000000	0.137986	0.128930	1.438504	0.458920	0.314097	2.355361	0.723952
ENSRNOG00000057057	AABR07001210.1	1:38836865-38882496	0.096278	0.148038	0.065738	0.285979	0.087106	0.148743	0.103298	0.285440	0.102045	0.143120	0.220414	0.023342
ENSRNOG00000053328	AABR07001233.1	1:38858029-39073344	0.806627	4.298279	1.511188	5.024850	1.865930	2.172664	1.175326	5.017600	4.262105	2.505011	4.297122	3.685785
XLOC_017915	XLOC_017915	1:39036919-39039753	0.106755	0.645142	0.066425	0.613716	0.076097	0.209347	0.029882	0.876370	0.524619	0.169204	0.675052	0.637000
XLOC_017916	XLOC_017916	1:39039092-39041180	0.075697	0.318871	0.000000	0.051731	0.141297	0.255135	0.008221	0.328881	0.174037	0.174960	0.052822	0.238773
XLOC_017918	XLOC_017918	1:39045546-39049619	0.054486	0.625738	0.158410	0.660109	0.170856	0.317275	0.083704	0.598277	0.561180	0.275939	0.854139	0.393597
XLOC_017921	XLOC_017921	1:39060423-39068094	0.243013	1.168375	0.436598	0.849364	0.649537	0.954730	0.213973	1.511540	1.067407	0.800269	1.787437	0.988236
XLOC_017922	XLOC_017922	1:39065897-39074347	0.187698	1.031005	0.082421	1.486841	0.799943	0.662491	0.453815	1.709859	0.903382	0.643038	1.181188	1.126157
XLOC_017924	XLOC_017924	1:39074642-39082710	0.312970	0.571220	0.000000	0.492033	0.397074	0.278879	0.000000	0.371767	0.094207	0.224907	0.412268	0.438187
XLOC_017925	XLOC_017925	1:39075170-39076387	0.171228	0.751138	0.000000	0.368462	0.327757	0.196288	0.059203	1.383023	0.459163	0.158952	1.055744	0.579850
ENSRNOG00000016286	Iyd	1:40086470-40101840	0.013332	0.079871	0.020997	0.165685	0.021446	0.149917	0.020236	0.089390	0.131216	0.072624	0.106340	0.042933
ENSRNOG00000016368	Ppp1r14c	1:39811314-39923057	5.875133	4.581007	6.830994	6.459116	6.339518	5.795198	5.598728	5.640828	4.649080	5.557338	4.277314	5.056371
XLOC_017981	XLOC_017981	1:39954611-39963418	0.000000	0.120641	0.079914	0.306129	0.115377	0.325802	0.000000	0.372465	0.085442	0.481277	0.000000	0.000000
XLOC_002514	XLOC_002514	1:40304197-40308005	0.106896	0.425357	0.063575	0.508379	0.315308	0.279374	0.056918	0.312853	0.313533	0.263887	0.450724	0.239771
ENSRNOG00000016011	Plekhg1	1:40389638-40520447	5.255194	5.310459	4.288398	3.592889	5.374082	5.045248	5.690168	3.397592	4.624035	4.305972	5.034730	5.927701
ENSRNOG00000055235	RF00003	1:40672831-40672993	0.000000	0.149092	0.178192	0.135078	0.101885	0.000000	0.000000	0.076656	0.000000	0.247193	0.247397	0.277758
ENSRNOG00000019549	Akap12	1:40816107-40906581	9.675838	5.079203	5.922029	5.104432	9.031898	5.784585	7.180932	4.941262	6.037575	9.440981	3.688533	4.826389
ENSRNOG00000019544	Zbtb2	1:40914171-40921508	3.716561	2.600707	3.396880	2.588862	3.204993	4.217175	2.593106	2.477467	2.152656	3.514941	2.924310	2.655003
XLOC_018028	XLOC_018028	1:40928855-40934354	0.170199	0.376531	0.094713	0.257395	0.287582	0.344195	0.096076	0.254167	0.148075	0.367076	0.380609	0.101587
ENSRNOG00000019501	Rmnd1	1:40948847-40972826	8.727197	11.154461	9.695309	11.758055	10.126045	10.230009	8.941211	12.534689	11.178330	10.589908	12.652642	10.207360
ENSRNOG00000019489	Armt1	1:40982862-41006371	8.637058	7.707864	8.887959	8.164083	8.122263	8.661567	9.417870	7.120067	9.259874	7.702758	7.576849	7.218016
ENSRNOG00000054876	RF00045	1:41003877-41004005	0.079549	0.283379	0.000000	0.305764	0.000000	0.330527	0.144010	0.000000	0.000000	0.259071	0.730459	0.353534
ENSRNOG00000024280	Ccdc170	1:41018817-41126043	0.955735	0.306874	0.486598	0.382520	0.725421	1.148311	0.605140	0.618827	0.330001	0.871768	0.676102	0.293728
ENSRNOG00000018858	Myct1	1:42121636-42131547	0.096461	0.076537	0.070277	0.077462	0.072839	0.0	0.067777	0.212594	0.0	0.123870	0.044663	0.106188
ENSRNOG00000053113	AABR07001389.1	1:42133308-42134374	0.028012	0.049412	0.0	0.033105	0.031129	0.031587	0.0	0.280037	0.028996	0.105347	0.0	0.062095
ENSRNOG00000054156	AABR07001392.1	1:42216726-42233317	0.630460	0.099839	0.208143	0.156245	0.528906	0.551285	0.478229	0.000000	0.096778	0.342276	0.375536	0.000000
ENSRNOG00000018808	Vip	1:42169501-42177582	7.919416	19.452471	17.244596	19.826460	7.778548	14.480484	14.725960	19.323261	20.787922	8.567483	19.844246	15.784147
XLOC_002559	XLOC_002559	1:42267042-42318787	0.000000	0.000000	0.000000	0.000000	0.000000	0.000000	0.000000	0.000000	0.000000	0.273570	0.163053	0.000000
ENSRNOG00000024077	Fbxo5	1:42461291-42467586	0.512168	0.587458	0.669206	0.234469	0.880116	0.888187	0.725476	0.382554	0.411371	0.651902	0.483108	0.525845
XLOC_018063	XLOC_018063	1:42696945-42726821	0.027147	0.000000	0.101435	0.160283	0.161701	0.091800	0.038608	0.369715	0.208977	0.105343	0.164655	0.300082
ENSRNOG00000059050	AABR07001416.1	1:42967295-42971208	0.000000	0.000000	0.0	0.0	0.000000	0.000000	0.000000	0.0	0.0	0.000000	0.000000	0.000000
ENSRNOG00000059359	AABR07001416.2	1:42968983-42969111	0.000000	0.049491	0.0	0.0	0.000000	0.000000	0.000000	0.0	0.0	0.050355	0.000000	0.000000
ENSRNOG00000060413	AABR07001416.3	1:42980623-42981544	0.000000	0.0	0.0	0.0	0.0	0.0	0.0	0.0	0.0	0.0	0.0	0.0
XLOC_018082	XLOC_018082	1:43062903-43071933	0.027986	0.164585	0.015053	0.149557	0.105843	0.145479	0.029482	0.213410	0.000000	0.245006	0.062316	0.147234
ENSRNOG00000059321	RF00494	1:42474137-42570486	0.619039	0.398288	0.493861	0.350076	0.548093	0.422006	0.512367	0.176740	0.599578	0.655854	0.228250	0.389290
ENSRNOG00000018773	Mtrf1l	1:42475792-42486035	7.310174	5.319016	5.433899	5.765170	5.389625	5.935244	6.133379	4.535555	6.284830	5.098772	5.067414	4.894969
ENSRNOG00000055161	RF00493	1:42477399-42477468	0.000000	0.086793	0.053589	0.000000	0.000000	0.151525	0.000000	0.167727	0.000000	0.000000	0.000000	0.022085
ENSRNOG00000018690	Rgs17	1:42492761-42587721	25.033278	21.030567	23.890320	22.534559	20.209841	21.599110	25.182619	20.089497	25.180513	18.501150	18.842194	18.798800
ENSRNOG00000004144	AABR07001435.1	1:43933275-43934512	1.360442	0.666837	1.057584	0.958485	0.863901	0.937216	1.141804	0.937586	0.879856	1.233267	0.737122	0.718659
ENSRNOG00000019358	Esr1	1:41192824-41594796	1.521896	0.391659	0.081536	0.535436	0.718938	0.495991	0.991068	0.514649	0.532098	0.457581	0.394361	0.464179
ENSRNOG00000057689	AABR07001379.1	1:41324538-41325153	0.000000	0.000000	0.000000	0.028671	0.000000	0.027540	0.050263	0.000000	0.000000	0.000000	0.000000	0.000000
ENSRNOG00000055223	RF00604	1:41353995-41455128	0.252493	0.000000	0.000000	0.000000	0.000000	0.072082	0.101127	0.014331	0.086002	0.000000	0.043705	0.000000
ENSRNOG00000055166	AABR07001382.2	1:41594112-41594799	0.173796	0.371186	0.362973	0.550376	0.722063	0.345212	0.001278	0.540294	0.905988	0.687998	0.343192	0.387453
ENSRNOG00000052241	RF00026	1:41608177-42086713	6.452941	8.057165	8.192598	6.031234	5.156052	7.392173	7.079946	4.588113	7.561108	4.033848	6.533827	4.000520
ENSRNOG00000018960	AABR07001382.1	1:41608418-42077535	105.805939	131.925827	126.985779	116.688370	94.718346	114.411530	114.524498	110.188797	131.243469	97.730934	123.574265	104.433884
XLOC_002550	XLOC_002550	1:42084801-42086713	0.051520	0.281096	0.000000	0.028079	0.000000	0.000000	0.153162	0.036478	0.088978	0.397860	0.000000	0.257744
ENSRNOG00000018191	Oprm1	1:43454803-43704948	7.021513	5.107827	5.575634	4.086165	6.433600	5.276935	6.493533	3.757143	4.245860	6.793542	3.350976	4.043886
ENSRNOG00000060991	AABR07001432.2	1:43532902-43533277	0.648118	0.257436	0.492849	0.586831	0.383087	0.682198	1.255290	0.318273	0.278397	1.096897	0.356414	0.309251
ENSRNOG00000059866	AABR07001432.1	1:43563457-43563998	13.049187	23.736324	32.620930	25.213526	19.271406	22.377563	17.926826	23.599010	30.015484	22.530527	24.130472	25.928860
ENSRNOG00000018163	Ipcef1	1:43567842-43638161	17.298309	35.424881	34.528385	28.139313	23.617083	25.472610	22.632193	29.537922	34.821327	30.701067	29.160322	25.691681
ENSRNOG00000055098	AABR07001433.1	1:43662162-43663521	0.000000	0.000000	0.000000	0.000000	0.000000	0.000000	0.000000	0.000000	0.000000	0.000000	0.000000	0.000000
ENSRNOG00000018052	Cnksr3	1:43725123-43884267	4.578185	4.426129	4.024435	2.545448	4.518687	4.665955	4.302298	2.243801	3.836845	4.072443	4.709353	3.527513
ENSRNOG00000016919	Scaf8	1:44019059-44120615	20.377733	15.507787	16.811447	15.361320	18.385693	18.742500	18.263899	14.792047	17.285591	19.561083	16.128641	13.883172
XLOC_002609	XLOC_002609	1:44164825-44169291	0.158957	0.801675	0.132305	0.647050	0.544162	0.416045	0.210062	0.875323	0.549865	0.730702	0.877555	0.824180
ENSRNOG00000057561	AABR07001444.1	1:44201653-44228243	0.378906	0.546254	0.176759	0.442187	0.272043	0.434620	0.392670	0.278488	0.288765	0.248503	0.306979	0.105822
XLOC_018223	XLOC_018223	1:44497751-44528058	0.419014	0.154815	0.329659	0.251259	0.313248	0.344775	0.465039	0.070555	0.354543	0.516851	0.411455	0.122871
XLOC_002632	XLOC_002632	1:44513565-44527965	0.309600	0.000000	0.094213	0.000000	0.000000	0.190017	0.000000	0.000000	0.000000	0.535492	0.000000	0.000000
ENSRNOG00000059546	AABR07001448.1	1:44590598-44929147	0.181162	0.789783	0.035523	0.753298	0.119135	0.272685	0.000000	0.294740	0.481157	0.053862	1.006316	0.664322
XLOC_002750	XLOC_002750	1:44890518-44893956	0.000000	0.197012	0.084093	0.061537	0.021845	0.011157	0.000000	0.181708	0.138925	0.037149	0.289766	0.183066
XLOC_002876	XLOC_002876	1:45418441-45422289	0.280645	0.0	0.0	0.0	0.0	0.0	0.0	0.0	0.0	0.0	0.0	0.0
ENSRNOG00000053052	LOC102548472	1:45821855-45828543	0.059556	0.0	0.0	0.000000	0.000000	0.000000	0.015911	0.064382	0.0	0.0	0.0	0.0
XLOC_018270	XLOC_018270	1:45084201-45086837	0.236860	0.196491	0.287803	0.066064	0.202353	0.390150	0.157893	0.039583	0.0	0.222974	0.000000	0.035963
XLOC_002851	XLOC_002851	1:45084520-45086584	0.000000	0.000000	0.432962	0.000000	0.000000	0.000000	0.000000	0.000000	0.0	0.000000	0.000000	0.000000
XLOC_018280	XLOC_018280	1:45103061-45113990	0.330640	0.115334	0.362014	0.057647	0.340384	0.894762	0.289803	0.023652	0.021921	0.506205	0.237761	0.247708
XLOC_018306	XLOC_018306	1:45162855-45196299	0.433162	0.088221	0.284398	0.338726	0.266267	0.378829	0.207151	0.000000	0.000000	0.296279	0.048895	0.000000
ENSRNOG00000054504	AABR07001452.1	1:45409196-45409764	0.247909	0.131177	0.348159	0.094411	0.263507	0.362346	0.162226	0.416450	0.162250	0.200475	0.155380	0.000000
ENSRNOG00000056223	Tfb1m	1:44433116-44474674	7.457839	4.625580	7.303941	5.383933	6.789608	6.965308	7.604538	5.198872	6.928101	5.901950	5.386833	4.737857
ENSRNOG00000023531	Cldn20	1:44446765-44447424	0.080911	0.028396	0.193570	0.130051	0.440177	0.003941	0.000954	0.146720	0.181728	1.093466	0.061717	0.000000
ENSRNOG00000016973	Tmem242	1:46296273-46329682	4.823598	3.687589	3.979680	3.472731	4.180285	4.550837	4.175202	3.227233	4.007117	5.399265	3.134265	3.622394
ENSRNOG00000017030	Arid1b	1:45923222-46234874	38.120029	22.631973	22.042652	23.678780	32.177086	28.776169	26.815590	22.291460	22.837616	30.298403	24.327883	15.741259
ENSRNOG00000058103	AABR07001477.1	1:46739695-46747129	0.207074	0.340982	0.420572	0.734473	0.821922	0.570431	0.491611	0.479505	0.449254	0.604910	0.136730	0.217249
XLOC_018428	XLOC_018428	1:46366934-46374376	1.367507	1.348610	1.496673	1.754033	1.133076	2.113556	0.898833	1.066137	1.739665	1.737730	1.631954	1.463652
XLOC_002910	XLOC_002910	1:46367049-46372745	0.149659	0.297154	0.248598	0.192669	0.423594	0.407153	0.099504	0.053441	0.234655	0.042875	0.134366	0.141412
ENSRNOG00000029049	Zdhhc14	1:46378807-46649292	16.460964	12.012376	15.289422	14.857395	16.216429	15.118726	19.378300	12.882789	16.865870	13.826014	13.421551	12.496382
XLOC_002915	XLOC_002915	1:46653921-46659351	0.373489	0.611561	0.234876	0.201973	0.445756	0.344780	0.384458	0.261103	0.253523	0.350255	0.514414	0.614206
ENSRNOG00000046874	Snx9	1:46779860-46825830	6.920644	4.821994	5.601566	3.297380	6.750588	5.862526	6.049073	3.431024	4.205873	5.987981	5.079733	4.202506
ENSRNOG00000017114	Synj2	1:46835768-46934015	26.393494	20.437164	33.235134	22.308792	18.083490	31.334375	25.730785	17.650822	29.160671	16.953199	19.480253	17.762747
ENSRNOG00000017889	Serac1	1:46872812-46978261	5.777210	4.781332	4.951955	4.775243	4.473031	5.173023	5.452536	4.842051	5.003747	4.818477	4.748527	4.907689
ENSRNOG00000018007	Gtf2h5	1:46978355-46990128	3.556309	2.547597	3.398505	2.648144	2.544842	2.915389	3.497957	2.341057	3.049175	3.246351	2.332132	2.040391
XLOC_018447	XLOC_018447	1:46988820-47002073	0.253654	0.296197	0.098000	0.031696	0.207182	0.129674	0.069653	0.123313	0.169694	0.185127	0.145551	0.144028
ENSRNOG00000018012	Tulp4	1:47032113-47127035	41.667660	29.893621	40.381058	32.829079	39.846039	39.900192	43.218979	27.812733	37.945736	30.869980	28.751055	29.394283
ENSRNOG00000045491	RF00001	1:47041989-47042105	0.223952	0.511351	0.156645	0.331087	0.670916	0.743354	0.124692	0.490699	0.318205	0.756349	0.236739	0.745610
ENSRNOG00000018207	Dynlt1	1:47149173-47213749	3.290752	2.534091	2.876076	2.050196	3.407514	3.149775	3.364359	2.069694	2.054421	2.945639	2.011722	2.285954
ENSRNOG00000018321	Sytl3	1:47231093-47287371	0.065844	0.013991	0.031454	0.043606	0.062458	0.023906	0.040602	0.037174	0.053760	0.084367	0.000000	0.034301
ENSRNOG00000018524	Ezr	1:47287874-47331412	15.541625	17.709108	18.754770	17.846298	18.076681	18.376867	16.007050	15.566078	20.735294	19.500624	16.817509	18.927458
ENSRNOG00000018762	Rsph3	1:47426258-47477524	1.371024	1.081174	1.352357	0.925073	1.544484	1.123475	1.549642	1.039834	1.028408	1.653114	1.347008	1.030527
ENSRNOG00000018915	Tagap	1:47493994-47502952	0.389412	0.345344	0.536867	0.269697	0.551756	0.309263	0.608816	0.138015	0.709167	0.534110	0.281930	0.207532
ENSRNOG00000058258	AABR07001493.1	1:47513066-47537519	0.000000	0.318924	0.107273	0.339228	0.053830	0.060755	0.000000	0.396770	0.333321	0.237029	0.502477	0.201284
XLOC_002984	XLOC_002984	1:47557463-47559056	0.047667	0.052477	0.064565	0.216983	0.035553	0.122696	0.077137	0.075887	0.135678	0.282802	0.256535	0.315808
XLOC_002985	XLOC_002985	1:47559197-47571010	0.217316	0.455129	0.242337	0.411092	0.163288	0.108620	0.355545	0.474533	0.202326	0.128130	0.634681	0.310525
ENSRNOG00000030210	Fndc1	1:47605262-47687504	1.096121	0.673010	0.927813	0.581201	1.029131	1.158114	0.719576	0.366107	0.753448	0.847231	0.670679	0.613906
XLOC_018503	XLOC_018503	1:47837749-47839239	0.000000	0.345687	0.342058	0.000000	0.135925	0.000000	0.199627	0.0	0.0	0.0	0.0	0.000000
XLOC_018545	XLOC_018545	1:47906520-47908198	0.126436	0.213220	0.089979	0.294954	0.220233	0.222599	0.070104	0.197870	0.159024	0.107736	0.165921	0.284002
ENSRNOG00000019048	Sod2	1:47914759-47921587	75.780685	50.158581	66.171097	54.221497	63.000111	56.113514	70.254379	49.713284	62.896175	58.264294	49.195381	50.027409
ENSRNOG00000019091	Wtap	1:47942500-47967631	24.503666	15.057903	23.523912	15.179392	21.349714	22.983786	24.245646	16.459835	18.791363	18.541723	13.934517	14.361567
ENSRNOG00000014965	Mas1l	1:48069194-48070536	0.044510	0.068854	0.051155	0.026301	0.165537	0.067791	0.070336	0.044922	0.034556	0.083416	0.056818	0.024585
ENSRNOG00000023140	Pnldc1	1:48039909-48058400	0.082440	0.437568	0.172511	0.390430	0.360754	0.497903	0.123494	0.395624	0.303019	0.654629	0.197058	0.407726
ENSRNOG00000019189	Acat2	1:47972399-47992653	7.655879	6.078176	7.276249	6.803491	5.794530	6.290740	6.302246	6.844875	5.328241	7.402136	5.455525	7.205961
ENSRNOG00000014160	Tcp1	1:48025663-48033396	45.569782	31.867094	42.243664	33.440418	38.850048	34.837093	40.132599	30.545605	34.795723	39.764542	28.093874	27.926632
ENSRNOG00000058152	RF00401	1:48027142-48027271	0.000000	0.723196	0.000000	0.318809	0.350882	0.959594	0.146132	0.319829	0.126136	0.338185	0.461642	0.000000
ENSRNOG00000051969	RF00429	1:48030434-48030570	0.471480	0.201727	0.185692	0.406887	0.463243	0.201124	0.051342	0.146608	0.126495	0.207729	0.848760	0.361502
ENSRNOG00000014582	Mrpl18	1:48033768-48038726	16.386066	9.782335	9.856196	8.901674	9.537448	11.084572	15.052084	8.755194	10.291420	9.948002	9.086712	7.973791
ENSRNOG00000016337	Slc22a1	1:48273611-48300655	0.046714	0.0	0.0	0.0	0.0	0.0	0.0	0.034087	0.0	0.0	0.0	0.0
ENSRNOG00000016625	Slc22a2	1:48317995-48360261	0.102107	0.047092	0.043286	0.062131	0.193216	0.045117	0.169603	0.0	0.027814	0.623637	0.0	0.044747
ENSRNOG00000053944	AC114389.1	1:48318080-48333670	0.000000	0.000000	0.000000	0.000000	0.046811	0.000000	0.000000	0.0	0.000000	0.293820	0.0	0.000000
ENSRNOG00000017223	Plg	1:48521772-48563776	0.010705	0.053621	0.170236	0.158685	0.257080	0.167449	0.353706	0.301625	0.506028	0.183995	0.130640	0.172535
ENSRNOG00000017412	AABR07001512.1	1:48565160-48565711	0.448499	0.613958	0.271697	0.266984	0.624069	0.459602	0.573436	0.450083	0.468399	0.613333	0.601108	0.162841
ENSRNOG00000022946	Slc22a3	1:48433079-48521256	0.835900	0.913830	0.970676	1.216846	0.785901	0.803853	0.978013	1.576753	0.880202	0.338137	0.907575	1.749379
XLOC_018575	XLOC_018575	1:48120433-48134858	0.256054	0.314806	0.436074	0.230301	1.134486	0.540185	0.354242	0.291298	0.248822	0.893419	0.455875	0.243752
ENSRNOG00000051780	RF00561	1:48120433-48264389	1.263209	0.707314	1.155839	0.805261	2.209247	1.361643	0.919852	1.003784	0.807928	4.347372	1.350714	0.597535
XLOC_003027	XLOC_003027	1:48127970-48129665	0.000000	0.000000	0.000000	0.153545	0.426866	0.203961	0.000000	0.204289	0.032274	0.333666	0.054891	0.242121
ENSRNOG00000014997	Igf2r	1:48176106-48264477	12.140342	9.841080	10.062663	11.157507	11.077997	10.715621	10.591674	10.378983	9.589515	12.261111	9.497145	9.660030
ENSRNOG00000055981	AABR07001516.1	1:48595605-48712460	1.376756	0.956796	0.939886	0.906127	1.076982	1.001672	0.862484	0.893574	1.038576	1.015182	0.892660	0.853837
ENSRNOG00000017419	Map3k4	1:48625743-48711642	11.416396	7.200869	10.279146	9.557866	10.757769	10.405807	10.074029	7.555325	9.545126	8.900638	7.593071	8.017756
ENSRNOG00000059864	RF00560	1:48643706-48643840	0.000000	0.000000	0.000000	0.000000	0.000000	0.000000	0.000000	0.000000	0.000000	0.000000	0.000000	0.000000
ENSRNOG00000054620	AC135026.1	1:48852450-48891130	2.331563	1.159391	4.218639	2.198939	2.948264	2.524733	2.385916	2.526782	1.641223	3.503038	1.634063	1.515839
ENSRNOG00000017731	Agpat4	1:48719633-48825364	39.898438	36.644321	39.331837	36.414444	35.229572	38.371460	41.005409	32.949280	38.956551	33.236771	36.642990	34.506702
XLOC_003066	XLOC_003066	1:50070305-50491592	2.262029	0.976137	0.961739	0.513240	1.629454	2.053216	1.424353	0.906871	0.789120	0.997477	1.223041	0.533526
XLOC_018706	XLOC_018706	1:50070306-50491400	0.254078	0.099887	0.267945	0.041549	0.167598	0.086886	0.183844	0.052373	0.050061	0.080028	0.077771	0.080448
XLOC_018711	XLOC_018711	1:50144902-50146165	0.000000	0.000000	0.122954	0.068381	0.184197	0.031486	0.105190	0.053977	0.135976	0.000000	0.045360	0.000000
XLOC_018713	XLOC_018713	1:50162973-50239364	0.299201	0.357324	0.283329	0.000000	0.000000	0.165544	0.000000	0.063711	0.255751	0.321922	0.000000	0.000000
XLOC_003126	XLOC_003126	1:50207714-50208024	0.297400	0.107408	0.000000	0.000000	0.000000	0.000000	0.000000	0.077169	0.000000	0.000000	0.000000	0.000000
XLOC_018721	XLOC_018721	1:50293253-50294546	0.000000	0.000000	0.000000	0.601236	0.000000	0.000000	0.000000	0.000000	0.000000	0.116566	0.000000	0.000000
XLOC_018752	XLOC_018752	1:50471174-50472961	0.027675	0.282607	0.071849	0.104781	0.120557	0.094248	0.067194	0.104204	0.040775	0.048030	0.034321	0.091408
ENSRNOG00000055141	AABR07001518.1	1:48945164-50070028	1.229678	1.024209	0.890975	1.013833	0.695365	1.264809	0.840448	0.576321	1.015467	0.731394	0.573519	0.627349
XLOC_003090	XLOC_003090	1:49006246-49068450	0.505261	0.051920	0.000000	0.000000	0.000000	0.000000	0.074087	0.000000	0.000000	0.316046	0.089148	0.000000
XLOC_003120	XLOC_003120	1:49117827-49121067	0.000000	0.003475	0.000000	0.000000	0.305656	0.000000	0.000000	0.000000	0.000000	0.000000	0.000000	0.000000
XLOC_003122	XLOC_003122	1:49260114-49271458	0.074195	0.000000	0.000000	0.063400	0.000000	0.000000	0.000000	0.041518	0.339990	0.035863	0.000000	0.058229
ENSRNOG00000055547	AABR07001519.1	1:49290112-50070047	8.537407	6.238296	7.914498	5.425245	6.318337	9.301952	7.738419	9.530785	5.250351	8.497500	8.537928	6.110404
ENSRNOG00000044833	RF00001	1:49487970-49487998	0.000000	0.000000	0.000000	0.000000	0.000000	0.000000	0.000000	0.000000	0.000000	0.000000	0.000000	0.000000
XLOC_018698	XLOC_018698	1:49945375-49951018	0.121040	0.434217	0.115284	0.391909	0.377200	0.380749	0.061045	0.765128	0.317362	0.635563	0.736304	0.529661
XLOC_018699	XLOC_018699	1:49950619-49953687	0.077605	0.132099	0.405046	0.526005	0.755798	0.107033	0.182101	0.583085	0.083097	0.509908	0.851497	0.774374
XLOC_018700	XLOC_018700	1:49974584-49980447	0.158810	0.572325	0.060113	0.506817	0.478931	0.543445	0.129379	0.705385	0.365621	0.765035	0.937820	0.506044
XLOC_003124	XLOC_003124	1:49976964-49998483	0.000000	0.022646	0.033354	0.000000	0.039493	0.351496	0.000000	0.000000	0.000000	0.035344	0.031268	0.078015
XLOC_018701	XLOC_018701	1:49986809-49994097	0.172723	0.592064	0.139244	0.622867	0.636426	0.645404	0.084343	1.100875	0.428061	0.892502	1.246179	0.660900
XLOC_018702	XLOC_018702	1:49994904-50003075	0.148768	0.683607	0.100569	0.570436	0.547568	0.573189	0.177261	0.960600	0.325316	0.728074	0.963911	0.713660
XLOC_018703	XLOC_018703	1:50013347-50017400	0.129091	0.470118	0.059977	0.360545	0.399616	0.374257	0.135826	0.964712	0.236636	0.650389	0.643852	0.332652
XLOC_018704	XLOC_018704	1:50023535-50040421	0.247738	0.993167	0.197066	0.770555	0.700354	0.725131	0.184691	1.282899	0.493724	1.282628	1.193059	0.915788
XLOC_018705	XLOC_018705	1:50043254-50050223	0.271933	1.071777	0.139856	0.916680	0.806710	0.843762	0.183390	1.438653	0.499323	1.356615	1.446940	1.135703
XLOC_003246	XLOC_003246	1:51356760-51365091	0.108038	0.120686	0.193189	0.110371	0.399361	0.204837	0.081071	0.101091	0.086095	0.853290	0.090619	0.100352
ENSRNOG00000017367	Pabpc6	1:51619875-51622942	0.009742	0.0	0.0	0.0	0.010826	0.0	0.010263	0.0	0.0	0.009175	0.0	0.032394
ENSRNOG00000060475	AABR07001555.1	1:51487784-51525579	0.276561	0.651105	0.089616	0.959525	0.273267	0.349999	0.188559	0.495509	0.494017	0.405241	0.421642	0.453846
XLOC_018828	XLOC_018828	1:51498284-51509578	0.046448	0.310332	0.031845	0.228411	0.096705	0.177743	0.091076	0.395168	0.175099	0.103233	0.165164	0.323402
XLOC_018825	XLOC_018825	1:51513282-51518405	0.000000	0.000000	0.000000	0.000000	0.000000	0.000000	0.143422	0.000000	0.000000	0.000000	0.000000	0.000000
XLOC_018851	XLOC_018851	1:51776851-51800087	0.341704	0.052493	0.0	0.0	0.128840	0.128747	0.028175	0.000000	0.000000	0.000000	0.0	0.0
ENSRNOG00000049044	AABR07001561.1	1:51840126-51840208	0.000000	0.000000	0.0	0.0	0.000000	0.0	0.0	0.000000	0.059642	0.000000	0.0	0.0
XLOC_003272	XLOC_003272	1:51925426-52026517	0.205309	0.104029	0.710038	0.096394	1.025736	0.303408	0.155814	0.098019	0.073255	1.899530	0.074521	0.108881
XLOC_003273	XLOC_003273	1:51926648-51934013	0.022879	0.015818	0.041159	0.000000	0.356042	0.052032	0.000000	0.016491	0.000000	0.475021	0.000000	0.006511
XLOC_003280	XLOC_003280	1:51967470-51969053	0.000000	0.000000	0.026884	0.000000	0.091097	0.085107	0.000000	0.000000	0.000000	0.283290	0.000000	0.013849
ENSRNOG00000011243	MGC94891	1:52330443-52354175	0.046486	0.132137	0.017437	0.019155	0.066707	0.070278	0.050258	0.021421	0.020291	0.091954	0.096058	0.067488
XLOC_018869	XLOC_018869	1:52034365-52077393	0.304585	0.000000	0.174826	0.000000	0.000000	0.194556	0.000000	0.000000	0.000000	0.000000	0.064681	0.000000
XLOC_018909	XLOC_018909	1:52159270-52175150	0.212732	0.151011	0.094077	0.075530	0.305469	0.247276	0.111652	0.094145	0.126359	0.439388	0.122906	0.117645
XLOC_003295	XLOC_003295	1:52163458-52176388	1.064858	0.673803	0.933144	0.754495	1.304016	0.779440	0.967814	0.561131	0.747350	1.899858	0.723672	0.670131
ENSRNOG00000012229	Tbxt	1:52887067-52894832	0.000000	0.031195	0.016289	0.017894	0.045514	0.051450	0.031902	0.006935	0.000000	0.0	0.061148	0.0
ENSRNOG00000048297	LOC108348175	1:50826647-51146853	15.735092	29.584835	13.312505	11.842663	11.624548	29.990646	16.591328	19.658144	11.702460	26.768179	15.761116	16.572403
XLOC_003181	XLOC_003181	1:51091553-51111905	0.035815	0.213119	0.027665	0.458218	0.098922	0.083278	0.040638	0.536683	0.104471	0.139188	0.267047	0.456931
XLOC_003182	XLOC_003182	1:51112260-51114024	0.000000	0.276844	0.030843	0.577491	0.015984	0.048984	0.000000	0.253943	0.118840	0.134099	0.221895	0.310253
XLOC_018951	XLOC_018951	1:52965050-52973589	0.713719	0.000000	0.000000	0.000000	0.000000	0.298893	0.128781	0.000000	0.000000	0.000000	0.000000	0.000000
ENSRNOG00000011310	Pde10a	1:52360296-52544450	48.916119	21.144503	20.094109	18.088781	49.432587	33.027821	64.302376	16.162796	19.154890	24.749662	28.380928	23.925415
XLOC_018940	XLOC_018940	1:52544667-52807284	1.070432	7.273058	2.151608	6.062932	3.127811	3.865062	1.547398	8.638371	3.298034	4.407608	7.851706	5.013794
XLOC_018941	XLOC_018941	1:52673040-52676580	0.096167	0.779506	0.205003	0.637805	0.230491	0.686702	0.082927	1.203891	0.343629	0.654888	1.360847	0.990451
XLOC_018942	XLOC_018942	1:52726701-52746230	0.190903	1.363402	0.308020	1.136787	0.641663	1.400708	0.058858	1.902390	0.591376	1.116460	1.878215	1.124253
XLOC_018943	XLOC_018943	1:52751962-52791914	0.251311	1.514893	0.317986	1.622674	0.895071	1.912514	0.093822	1.720011	0.644455	1.087936	1.592569	0.999971
XLOC_003297	XLOC_003297	1:52804344-52810278	0.482364	0.638528	0.778179	0.523648	0.469907	0.418965	0.445602	0.787878	0.657245	0.405616	0.710036	0.405856
ENSRNOG00000024149	Prr18	1:52991287-52992213	15.556950	11.660862	12.193918	3.768508	11.942203	10.278749	12.174039	3.156952	5.456560	7.266148	12.062325	10.575854
ENSRNOG00000024140	Sft2d1	1:52998529-53014466	14.598026	12.367123	13.433773	13.490504	14.125098	14.585759	15.242279	6.360702	11.039242	13.203153	11.914502	11.791095
ENSRNOG00000012964	Ccr6	1:53065025-53087474	0.020919	0.021694	0.088808	0.0	0.026758	0.0	0.044223	0.068078	0.021727	0.0	0.028605	0.0
ENSRNOG00000012415	Mpc1	1:53026608-53038869	18.364868	16.446262	18.795425	15.602502	15.739964	15.653362	17.395355	16.960062	17.407507	32.114784	15.915754	17.243902
ENSRNOG00000055093	Fgfr1op	1:53120012-53152866	4.140716	3.386397	3.570911	2.565618	3.142131	2.778403	3.142533	2.921207	2.881756	4.036594	4.134458	2.975266
ENSRNOG00000013190	Rnaset2	1:53174879-53192048	15.406234	6.694277	11.176068	6.365921	12.351581	9.935132	12.693559	3.617371	10.438394	9.440159	7.361603	7.365264
ENSRNOG00000039255	Gpr31	1:53519829-53520788	0.706847	0.509186	0.484200	0.232663	0.501679	0.436606	0.438740	0.339974	0.841371	0.722241	0.424869	0.417087
ENSRNOG00000013374	Tcp10b	1:53531076-53554113	0.000000	0.000000	0.000000	0.0	0.0	0.000000	0.016956	0.0	0.0	0.0	0.0	0.000000
ENSRNOG00000047027	Unc93a	1:53573128-53589844	0.041058	0.099957	0.0	0.0	0.022773	0.035953	0.127446	0.0	0.0	0.0	0.094844	0.0
ENSRNOG00000053284	RF00003	1:53584248-53584410	0.000000	0.000000	0.0	0.0	0.000000	0.000000	0.000000	0.0	0.0	0.0	0.048313	0.0
XLOC_003382	XLOC_003382	1:53606553-53614394	0.028260	0.0	0.0	0.0	0.0	0.346638	0.0	0.0	0.0	0.0	0.0	0.0
ENSRNOG00000057484	AABR07001573.1	1:53220397-53295378	0.866700	0.307296	0.184223	0.295907	0.728402	0.884366	0.419551	0.707074	0.425395	0.452252	0.285173	0.260052
ENSRNOG00000052521	RF00565	1:53223789-53499540	1.664455	0.000000	1.201309	0.000000	0.000000	0.001483	0.000000	0.001121	0.086988	0.879064	0.000000	0.000000
XLOC_003341	XLOC_003341	1:53286101-53287176	0.091188	0.179005	0.071996	0.401174	0.089838	0.341339	0.029759	0.037853	0.080315	0.129948	0.162372	0.093405
XLOC_003357	XLOC_003357	1:53327965-53332601	0.063557	0.173791	0.030389	0.079304	0.229241	0.271120	0.061712	0.097980	0.097107	0.174875	0.478679	0.141898
ENSRNOG00000060227	RF00026	1:53360042-53499559	0.637340	1.643710	0.966376	1.105661	1.262600	1.800440	2.208609	0.974641	1.976408	0.381388	1.630779	1.077754
ENSRNOG00000013194	Rps6ka2	1:53360157-53499445	16.306074	15.232135	19.037458	14.986791	15.141929	18.510962	20.015368	10.649205	21.027082	11.676702	17.349350	12.962342
XLOC_003418	XLOC_003418	1:53925349-53932433	0.000000	0.000000	0.000000	0.108685	0.000000	0.000000	0.000000	0.0	0.000000	0.241002	0.000000	0.0
XLOC_003441	XLOC_003441	1:53993738-53994922	0.279334	0.0	0.0	0.0	0.139170	0.174404	0.0	0.0	0.000000	0.0	0.0	0.000000
XLOC_003457	XLOC_003457	1:54110756-54118990	0.223001	0.069892	0.278979	0.0	0.044250	0.051176	0.189808	0.020568	0.241280	0.105927	0.081917	0.184876
ENSRNOG00000051553	LOC103690980	1:54062186-54063901	3.078338	0.000000	1.949976	1.051510	1.810215	1.795229	1.776119	1.360540	1.320853	0.986682	0.182531	1.422359
XLOC_003473	XLOC_003473	1:54577106-54581288	0.000000	0.090412	0.000000	0.072105	0.199971	0.000000	0.000000	0.222305	0.195746	0.164479	0.060025	0.000000
ENSRNOG00000060438	AABR07001634.1	1:54418563-54456017	10.265514	6.173009	10.168085	8.460849	8.793255	7.711932	5.496321	8.164833	7.783154	8.778016	7.960279	9.102626
XLOC_003479	XLOC_003479	1:54754981-54755547	0.600761	0.702535	0.508686	0.000000	0.486045	0.571544	0.000000	0.000000	0.000000	0.000000	0.000000	0.466841
ENSRNOG00000046250	LOC100911027	1:54719971-54748763	11.409089	11.971992	18.635185	14.390696	8.861780	14.464456	14.591100	15.573165	18.283346	5.949630	6.719283	11.618180
ENSRNOG00000023753	Afdn	1:53704026-53841211	20.557247	18.187031	17.797832	20.152813	19.112909	18.776405	20.395861	20.022739	19.569117	22.166328	18.128355	17.313673
XLOC_003389	XLOC_003389	1:53840258-53841211	0.069136	0.189337	0.031056	0.000000	0.078477	0.283121	0.138726	0.625957	0.123450	0.121341	0.350563	0.226015
ENSRNOG00000051938	AABR07001591.1	1:53841653-53844518	0.498219	0.445718	0.495694	0.319666	0.336040	0.408761	0.406614	0.498175	0.476934	0.557111	0.564724	0.424982
XLOC_003481	XLOC_003481	1:55602581-55607558	2.469968	2.113131	2.456020	2.273454	1.983202	2.262674	2.274942	2.383388	2.263101	1.631134	1.793282	2.501738
XLOC_019065	XLOC_019065	1:55602908-55605212	1.589911	1.110553	1.399251	0.921049	0.904425	1.144608	1.431864	1.204391	1.235859	0.919743	1.069812	1.111830
ENSRNOG00000014166	Smoc2	1:56242300-56374120	0.711205	0.062060	0.275856	0.308175	0.523686	0.639918	0.384024	0.099263	0.320769	0.253980	0.156676	0.111919
XLOC_003500	XLOC_003500	1:56553194-56606551	0.075658	0.654525	0.162132	0.394104	0.027385	0.351268	0.323368	1.048252	0.420275	0.061781	1.003547	0.572638
ENSRNOG00000058989	AABR07001764.1	1:56732566-56746083	0.000000	0.000000	0.000000	0.0	0.0	0.0	0.0	0.0	0.0	0.0	0.000000	0.0
ENSRNOG00000010529	Thbs2	1:56653938-56683731	1.515211	0.544595	1.001430	0.898577	1.421907	0.903055	1.013600	0.340514	0.774907	1.432793	0.595971	0.482105
ENSRNOG00000059948	RF00105	1:56860067-56860144	0.592409	2.362806	0.981147	0.104068	1.459517	0.108386	0.071466	4.054572	0.113519	3.120972	3.384888	1.985947
ENSRNOG00000053938	RF00105	1:56864797-56864874	0.485372	3.469440	0.395735	4.987433	2.633037	1.837119	0.122001	4.191198	0.941395	2.652855	4.289159	4.950754
ENSRNOG00000058803	RF00105	1:56872995-56881213	1.396873	5.787870	1.198557	1.732509	3.190001	4.185229	1.343059	8.529945	1.982002	6.172322	6.138927	5.372209
ENSRNOG00000060933	RF00105	1:56873956-56881213	1.081398	6.285689	1.362924	7.033841	3.422878	3.196450	1.495210	10.893399	2.551411	6.253325	7.187563	8.111952
ENSRNOG00000051787	RF00105	1:56880544-56880620	0.040741	0.066327	0.060222	0.125362	0.065161	0.058397	0.050843	0.067522	0.054711	0.058625	0.082945	0.071369
ENSRNOG00000015293	Tcte3	1:56970654-56982642	0.138145	0.000000	0.204757	0.066219	0.190832	0.164086	0.030069	0.120670	0.080676	0.148679	0.117284	0.139711
XLOC_003561	XLOC_003561	1:57016807-57017893	0.000000	0.0	0.0	0.0	0.0	0.000000	0.000000	0.0	0.0	0.229248	0.000000	0.277219
XLOC_003563	XLOC_003563	1:57147191-57153327	0.000000	0.0	0.026817	0.0	0.000000	0.053505	0.024860	0.0	0.0	0.400199	0.0	0.0
ENSRNOG00000061312	Phf10	1:56949719-56967895	14.405665	11.256419	13.644030	13.333837	15.658780	14.574944	14.378386	11.864347	13.357861	15.216122	12.985890	12.883719
ENSRNOG00000015230	Ermard	1:56982740-57008126	2.003864	2.460206	2.189871	2.493542	2.268827	2.471141	1.962643	2.239766	2.112749	2.613478	2.901348	2.686346
ENSRNOG00000058790	Fam120b	1:57318768-57392113	17.285152	16.124058	18.345476	18.506954	19.806820	12.919488	14.156972	20.277641	16.434893	14.119919	17.643959	13.498941
ENSRNOG00000021493	Prdm9	1:57533577-57555048	0.245428	0.174804	0.124887	0.191357	0.124022	0.244698	0.110321	0.175749	0.170608	0.278130	0.183474	0.137966
XLOC_003647	XLOC_003647	1:57654549-57659016	0.059361	0.248772	0.025845	0.070956	0.080229	0.123115	0.000000	0.013009	0.123680	0.034109	0.035171	0.013336
XLOC_003608	XLOC_003608	1:57555231-57565963	2.980650	3.048745	1.930469	2.209747	2.670719	3.218571	3.151389	2.593508	2.775535	2.220175	2.792084	3.248898
XLOC_019129	XLOC_019129	1:57555269-57565140	0.398697	0.663781	0.501922	0.690796	0.467666	0.548804	0.221518	0.476671	0.225421	0.625380	0.000000	0.651894
ENSRNOG00000001488	Psmb1	1:57470632-57489727	97.815300	66.107071	94.143036	70.352982	79.483444	77.081192	88.495636	65.877571	73.280411	78.701668	60.865650	61.614460
ENSRNOG00000001489	Tbp	1:57491377-57521595	2.194150	1.657949	1.743569	1.734820	1.976181	2.072453	2.226642	1.697530	1.801741	1.602246	1.205392	1.734095
ENSRNOG00000001490	Pdcd2	1:57512968-57518458	11.556894	7.836071	9.073364	7.994924	8.464621	9.569973	9.933913	7.452610	8.072045	8.914299	7.977307	7.108834
ENSRNOG00000014434	Chd1	1:57671451-57760611	8.527864	7.569330	7.673026	7.518201	8.876003	9.327358	6.504147	7.688625	7.268263	9.814651	8.667613	7.319516
ENSRNOG00000052286	AABR07001799.1	1:57999495-58107651	0.000000	0.0	0.037312	0.010247	0.0	0.0	0.0	0.0	0.0	0.370011	0.0	0.0
ENSRNOG00000056478	AABR07001807.1	1:58339947-58345450	0.000000	0.000000	0.000000	0.000000	0.000000	0.000000	0.000000	0.063546	0.020392	0.040602	0.066824	0.066555
ENSRNOG00000048190	Rgmb	1:57796709-57815038	32.024517	16.182981	26.960096	29.082918	31.617367	27.703598	26.918159	20.126423	24.240891	28.125717	15.226074	18.982107
ENSRNOG00000012692	Riok2	1:59129951-59146776	6.480835	4.786044	6.361788	5.060408	6.319744	5.448681	5.800998	4.739984	5.623196	7.132490	5.546482	4.514735
ENSRNOG00000012988	Lix1	1:59156251-59214452	28.018627	20.605839	26.941900	21.616859	31.310318	24.809185	22.858120	19.489252	25.507116	31.247383	26.820780	32.899853
XLOC_003775	XLOC_003775	1:59446553-59456094	0.428552	0.188533	0.302009	0.140328	0.384613	0.311501	0.222418	0.128377	0.191804	0.175353	0.196653	0.011263
XLOC_003783	XLOC_003783	1:59483712-59509470	0.848820	0.602806	0.690274	0.351866	0.728133	0.740477	0.797199	0.398019	0.652201	0.717652	0.511141	0.396744
XLOC_019232	XLOC_019232	1:59483727-59505525	0.376619	0.000000	0.000000	0.000000	0.000000	0.251467	0.000000	0.000000	0.000000	0.000000	0.000000	0.000000
ENSRNOG00000047387	Lnpep	1:59297294-59347472	19.025715	18.177996	16.194754	18.788271	19.057507	20.159882	17.909185	15.310861	19.705969	24.049374	17.595661	17.542038
ENSRNOG00000042605	Fpr2	1:59800984-59802401	0.000000	0.021786	0.022373	0.006186	0.000000	0.023928	0.0	0.032968	0.000000	0.009959	0.014076	0.046102
ENSRNOG00000060169	RF00026	1:59770116-59770222	0.000000	0.000000	0.000000	0.000000	0.000000	0.000000	0.000000	0.000000	0.000000	0.000000	0.000000	0.000000
ENSRNOG00000011234	AC091336.1	1:60106034-60107039	0.712944	0.449991	0.619636	0.526467	0.789751	0.557570	0.649508	0.579902	0.395741	0.336219	0.384068	0.668126
XLOC_003831	XLOC_003831	1:60164545-60212338	0.075656	0.000000	0.000000	0.094668	0.000000	0.065031	0.000000	0.102273	0.025546	0.000000	0.392197	0.000000
XLOC_003833	XLOC_003833	1:60166010-60234078	0.049289	0.107852	0.062043	0.221952	0.069254	0.044314	0.000000	0.604793	0.288166	0.259820	0.534284	0.428592
ENSRNOG00000039076	Spaca6	1:59700614-59737170	0.495177	1.582558	0.744944	1.537279	1.405334	1.564729	0.598199	1.743339	1.388337	1.304123	2.098711	1.370033
ENSRNOG00000035453	Mir3596c	1:59701029-59716824	0.670106	0.696096	0.882777	0.609288	1.011294	0.561391	0.438978	0.884674	0.631436	0.956749	1.260979	0.527327
ENSRNOG00000035654	Mir99b	1:59704216-59704285	0.000035	0.066361	0.049812	0.000145	0.000222	0.060272	0.005517	0.052242	0.002021	0.071682	0.065256	0.000094
ENSRNOG00000035572	Mir125a	1:59704827-59704911	0.000063	0.055948	0.012889	0.000000	0.000055	0.049730	0.000135	0.041039	0.000075	0.043563	0.081757	0.000028
ENSRNOG00000010994	Has1	1:59720612-59732409	0.046149	0.191571	0.106565	0.227228	0.121571	0.192222	0.087935	0.344480	0.192211	0.158590	0.310161	0.115747
ENSRNOG00000050623	Vom1r-ps112	1:60826153-60830218	0.007152	0.110555	0.224075	0.270399	0.083106	0.008232	0.002989	0.015215	0.282010	0.046610	0.051990	0.229442
XLOC_019311	XLOC_019311	1:60830471-60831496	0.041570	0.114432	0.044720	0.000000	0.000000	0.130638	0.000000	0.085992	0.047779	0.383047	0.000000	0.162772
ENSRNOG00000060596	AABR07001880.1	1:60846652-60847587	0.142099	0.085549	0.0	0.075601	0.034303	0.162518	0.016708	0.011470	0.048149	0.077144	0.134432	0.133856
ENSRNOG00000060716	AABR07001888.1	1:61219351-61220289	0.007958	0.0	0.015866	0.007273	0.0	0.003854	0.013338	0.055176	0.003075	0.057848	0.011206	0.049744
ENSRNOG00000059492	LOC100365363	1:60871748-60896770	5.806089	4.045728	4.530386	4.151587	5.313457	5.206650	4.735447	4.157753	4.626445	5.406859	4.303985	4.252156
XLOC_003873	XLOC_003873	1:61069535-61070021	0.000000	0.000000	0.000000	0.035283	0.000000	0.000000	0.050181	0.000000	0.313558	0.000000	0.000000	0.103206
ENSRNOG00000032996	Vom1r19	1:61095171-61096112	0.263350	0.339531	0.238022	0.309313	0.000000	0.485649	0.298602	0.285475	0.723664	0.409545	0.129723	0.415445
ENSRNOG00000011282	Ppp2r1a	1:60717386-60736609	193.887360	144.572861	204.722610	186.198120	172.075180	172.528900	200.880081	163.413223	185.265472	176.402115	139.988724	140.194489
XLOC_003951	XLOC_003951	1:61699385-61723863	0.797982	0.430647	0.891060	1.898525	0.493447	0.306750	0.351226	0.751538	0.794542	0.587658	1.221208	0.689770
XLOC_003899	XLOC_003899	1:61245310-61253037	1.393742	1.289378	1.355308	1.364789	1.373139	1.390752	1.147229	1.591144	1.257722	1.781282	1.710272	1.588410
XLOC_019338	XLOC_019338	1:61245372-61268206	0.175856	0.178997	0.298964	0.308175	0.026424	0.187417	0.154516	0.050901	0.073840	0.297627	0.193566	0.105418
ENSRNOG00000052406	LOC102552527	1:61258089-61276755	1.381816	1.826103	1.485771	1.961487	2.197937	1.274621	1.166047	1.408354	1.282980	1.986706	1.986415	1.699524
XLOC_003902	XLOC_003902	1:61261683-61264852	0.114139	0.427252	0.239018	0.369353	0.377633	0.211564	0.123868	0.384931	0.196899	0.436265	0.521655	0.374996
XLOC_003923	XLOC_003923	1:61311071-61313013	0.000000	0.195132	0.0	0.125225	0.0	0.000000	0.044694	0.091737	0.000000	0.067281	0.230985	0.095632
ENSRNOG00000051578	Zfp54	1:61314070-61326280	0.412859	0.817227	0.525863	0.929865	1.137803	0.534154	0.387832	0.981218	0.628552	0.844111	1.169312	0.907972
ENSRNOG00000058436	LOC108348215	1:61336227-61592909	0.364282	0.573625	0.264925	0.683450	1.012516	1.197063	0.235189	0.933718	0.682017	0.928853	0.736631	0.246266
XLOC_019351	XLOC_019351	1:61348328-61367324	0.000000	0.000000	0.154647	0.000000	0.178314	0.094511	0.131561	0.268836	0.000000	0.101259	0.000000	0.000000
ENSRNOG00000042347	AABR07001896.1	1:61374379-61377590	2.320530	1.568976	1.500218	1.135270	2.907089	1.921173	1.495641	1.630239	1.637623	2.317364	1.691521	1.499831
ENSRNOG00000042826	Zfp52	1:61382118-61426320	1.263826	1.891662	0.900160	1.517713	1.567736	1.769232	1.025034	1.747165	1.123797	2.145112	2.316586	2.280023
ENSRNOG00000060256	RF00009	1:61398148-61398383	0.000000	0.325067	0.473219	0.424570	0.291800	0.768684	0.626625	0.512556	0.305021	0.877589	0.396975	0.175932
XLOC_003924	XLOC_003924	1:61429573-61434124	0.680432	1.264328	0.675825	0.798416	1.316783	1.001210	0.575883	1.426392	0.901802	0.954578	1.485451	1.020385
ENSRNOG00000043341	Zfp51	1:61522298-61533178	2.136809	2.753649	2.260765	2.148570	3.035705	2.621081	2.317958	2.515602	2.180469	3.416811	2.473837	2.397377
ENSRNOG00000042547	AABR07001902.1	1:61553449-61553970	0.245446	0.345615	0.092600	0.162403	0.486129	0.222080	0.458430	0.091206	0.000000	0.154017	0.110026	0.125445
XLOC_003956	XLOC_003956	1:61757646-61759135	0.120209	0.196510	0.219928	0.087534	0.185902	0.196645	0.086147	0.149329	0.042324	0.504706	0.167167	0.000000
ENSRNOG00000058030	AABR07001905.2	1:61733805-61740311	5.636278	3.557075	4.053813	3.070882	5.337796	4.972503	3.968768	2.741579	3.952500	5.685082	3.957387	3.434705
ENSRNOG00000057250	AABR07001905.1	1:61786900-61818159	1.078030	1.051199	0.978234	0.987235	0.790895	1.023590	0.980542	1.451215	1.129485	0.629888	1.498999	1.213048
ENSRNOG00000051570	AABR07001910.1	1:61870347-61872975	0.883094	1.184875	0.791533	1.063754	1.421780	0.838578	0.729225	0.803352	0.687548	0.485388	1.515248	1.035043
ENSRNOG00000047884	AABR07001923.1	1:61953166-62172816	1.683542	3.147756	1.559337	2.642796	2.631791	2.511524	1.595813	2.453864	2.151677	2.241340	3.121164	3.529711
ENSRNOG00000054919	RF00026	1:61974106-61974212	0.000000	0.181889	0.023038	0.000000	0.000000	0.000000	0.000000	0.131875	0.089637	0.000000	0.074868	0.000000
XLOC_019406	XLOC_019406	1:61997281-62007784	0.028446	0.058139	0.051128	0.142877	0.042357	0.078375	0.057281	0.292443	0.069296	0.126429	0.212081	0.303853
ENSRNOG00000055824	RF00026	1:62062165-62062271	0.000000	0.062554	0.000000	0.499578	0.087951	0.000000	0.000000	0.263749	0.103130	0.214677	0.229679	0.155834
XLOC_019435	XLOC_019435	1:62089334-62098079	0.152844	0.637409	0.202343	0.741514	0.303219	0.305684	0.162100	1.039421	0.395427	0.520456	0.876048	0.839499
ENSRNOG00000026569	LOC102555377	1:62117854-62202236	2.425181	3.659249	3.851437	3.081824	3.130050	1.866854	2.973923	4.170923	3.188778	1.409434	2.845548	3.250343
ENSRNOG00000028767	AABR07001926.1	1:62177883-62209320	0.355904	0.054372	0.151085	0.056753	0.138442	0.077272	0.212379	0.019218	0.015812	0.671784	0.067157	0.032250
ENSRNOG00000051875	AABR07001926.2	1:62177883-62229339	0.313562	0.205274	0.472215	0.213209	0.327947	0.657272	0.360037	0.605766	0.418324	0.297811	0.326215	0.387454
ENSRNOG00000058286	LOC682419	1:62753049-62935789	0.000000	0.000000	0.0	0.000000	0.000000	0.000000	0.000000	0.000000	0.000000	0.007997	0.000000	0.005287
ENSRNOG00000054736	Vom2r16	1:62803184-62915803	0.117083	0.000000	0.0	0.047468	0.060700	0.345681	0.182477	0.185355	0.173568	0.503285	0.146798	0.143824
ENSRNOG00000047616	AABR07001967.1	1:62964901-62979941	0.000000	0.000000	0.000000	0.000000	0.0	0.000000	0.000000	0.0	0.000000	0.000000	0.012069	0.000000
ENSRNOG00000053825	Vom1r28	1:63201271-63202203	0.000000	0.0	0.0	0.0	0.0	0.0	0.0	0.0	0.0	0.0	0.0	0.0
ENSRNOG00000054778	Vom1r29	1:63245803-63246720	0.000000	0.0	0.0	0.000000	0.000000	0.000000	0.000000	0.000000	0.000000	0.000000	0.0	0.000000
ENSRNOG00000056653	Vom1r109	1:63263722-63264582	0.000000	0.0	0.0	0.000000	0.000000	0.000000	0.000000	0.000000	0.000000	0.000000	0.0	0.000000
ENSRNOG00000055843	LOC100911224	1:63278580-63403759	3.062824	2.141064	0.000000	0.000000	3.006013	0.066528	0.000000	2.247197	0.000000	0.150546	2.490187	2.101411
ENSRNOG00000058214	AC098462.1	1:63299393-63315881	0.023365	0.000000	0.000000	0.000000	0.000000	0.000000	0.000000	0.000000	0.112786	0.000000	0.000000	0.000000
ENSRNOG00000057219	Vom1r30	1:63333283-63334176	0.000000	0.000000	0.000000	0.000000	0.000000	0.000000	0.000000	0.000000	0.000000	0.000000	0.000000	0.000000
XLOC_004033	XLOC_004033	1:63345009-63408104	0.000000	0.167478	0.090319	0.000000	0.000000	0.119134	0.000000	0.521931	0.086908	0.238394	0.171628	0.276064
XLOC_019521	XLOC_019521	1:63498394-63500767	0.000000	0.000000	0.000000	0.000000	0.000000	0.000000	0.000000	0.000000	0.212214	0.108586	0.434983	0.000000
XLOC_019529	XLOC_019529	1:63595669-63602030	0.000000	0.062817	0.000000	0.218511	0.024121	0.134576	0.000000	0.582456	0.276180	0.219663	0.137552	0.170312
XLOC_019451	XLOC_019451	1:62230591-62268048	1.071218	1.337751	1.335833	1.197526	2.286203	1.772359	0.975295	1.311321	1.526445	1.774170	1.455357	1.580773
XLOC_003984	XLOC_003984	1:62273911-62275524	0.000000	0.000000	0.000000	0.0	0.000000	0.360168	0.0	0.000000	0.000000	0.043607	0.000000	0.0
XLOC_003988	XLOC_003988	1:62283764-62284639	0.000000	0.061236	0.000000	0.0	0.0	0.067996	0.0	0.000000	0.000000	0.239192	0.078128	0.0
XLOC_019487	XLOC_019487	1:62426770-62441053	0.106148	0.214531	0.028162	0.113309	0.036010	0.303042	0.037559	0.454834	0.211571	0.224010	0.398452	0.319672
XLOC_019493	XLOC_019493	1:62458939-62497765	0.130050	0.543953	0.173576	0.353618	0.234575	0.455294	0.123703	0.686743	0.415295	0.399514	0.652840	0.621562
XLOC_003995	XLOC_003995	1:62472196-62487853	0.000000	0.001801	0.024026	0.000000	0.052805	0.000000	0.049892	0.102748	0.009674	0.317596	0.135776	0.000000
XLOC_019470	XLOC_019470	1:62472516-62577706	0.979390	2.621547	0.838973	1.297947	1.104195	1.767602	0.666923	3.652003	1.291915	1.154221	2.166993	2.300660
ENSRNOG00000058087	Lilrc2	1:63664328-63729178	0.028328	0.113017	0.000000	0.221325	0.115629	0.060265	0.000000	0.942949	0.000000	0.027879	0.070227	0.424109
ENSRNOG00000053260	Lilrb3a	1:63728730-64013289	0.117651	0.716434	0.452407	0.620759	0.231219	0.281494	0.191025	0.256864	0.561843	0.376194	0.471689	0.317812
ENSRNOG00000058538	AABR07002001.1	1:63964155-63967366	0.000000	0.000000	0.000000	0.000000	0.000000	0.000000	0.000000	0.000000	0.000000	0.000000	0.000000	0.000000
ENSRNOG00000058909	Rps9l1	1:64018125-64090021	101.051300	73.929909	111.387825	64.086166	84.414490	78.202492	92.930794	57.633045	71.072708	76.820587	61.842030	46.596386
ENSRNOG00000055179	Tsen34l1	1:64024240-64030175	19.849545	8.619515	12.925301	8.811531	11.974803	17.459421	16.883009	8.668760	11.172995	14.123440	11.807678	10.822019
ENSRNOG00000052600	Mboat7l1	1:64031859-64046135	32.723457	19.069685	27.211885	28.373692	25.165152	28.301910	34.585804	26.043673	27.612236	26.061609	20.768620	25.136240
ENSRNOG00000059741	Tmc4	1:64046377-64126611	0.039620	0.137359	0.044661	0.047905	0.146953	0.077162	0.052979	0.058537	0.039837	0.040446	0.022193	0.029956
ENSRNOG00000058422	Pirb	1:64074231-64081438	0.008837	0.034612	0.080738	0.067356	0.057383	0.013496	0.002922	0.006412	0.060220	0.003704	0.009280	0.011508
ENSRNOG00000059572	Tsen34	1:64091867-64114434	3.539095	3.234852	4.765575	3.635617	4.440902	2.588854	3.690864	2.397988	0.000000	4.565802	0.000000	2.543843
ENSRNOG00000054459	Mboat7	1:64101018-64113792	0.000000	16.666906	24.264256	0.000000	21.961514	0.000000	0.000000	0.000000	0.000000	0.000000	0.000000	0.000000
ENSRNOG00000061893	Leng1	1:64126882-64131814	1.910350	1.558727	2.381551	1.164165	1.980293	1.713565	1.817181	1.348181	1.867098	1.528700	2.087847	1.223955
ENSRNOG00000053234	Cnot3	1:64130908-64147251	7.940385	8.272884	8.704700	7.818219	9.625510	8.262069	8.226941	8.196358	7.522350	10.302503	7.640112	7.412881
ENSRNOG00000060004	Mir3572	1:64135964-64136071	0.004712	0.208317	0.170689	0.555155	0.345281	0.332957	0.004207	0.291022	0.108585	0.301287	0.420083	0.005155
ENSRNOG00000061039	Prpf31	1:64150786-64162461	7.091560	5.747346	7.534640	5.808494	6.601139	6.808962	6.974166	6.185091	6.768075	7.153980	5.451345	5.815702
ENSRNOG00000056098	Tfpt	1:64162672-64188658	8.821216	6.475918	7.937478	6.687283	8.868188	6.283116	7.105620	6.982265	7.925683	6.017281	5.444331	4.893108
ENSRNOG00000060293	Ndufa3	1:64172441-64175099	78.374031	48.643429	88.027420	56.255817	64.596375	46.863297	47.768948	44.206375	63.806870	46.491516	29.906219	30.607185
ENSRNOG00000055716	Oscar	1:64182422-64188658	0.014731	0.060165	0.116950	0.081454	0.147060	0.029881	0.000000	0.048875	0.011530	0.000000	0.046852	0.000000
ENSRNOG00000057852	Cacng6	1:64304556-64329702	3.502862	2.715649	3.384841	3.124557	0.662359	4.027728	2.915583	3.197784	3.185263	3.122086	2.624073	1.663650
ENSRNOG00000057848	Cacng8	1:64329825-64354156	62.324398	43.504444	61.331890	54.668625	55.316463	62.309608	54.045589	53.583111	54.885559	58.381924	43.859051	47.046734
ENSRNOG00000054831	Mir935	1:64330549-64330639	0.089482	0.088088	0.100734	0.109519	0.096941	0.097477	0.097325	0.095505	0.092288	0.084764	0.123472	0.093973
ENSRNOG00000056257	Cacng7	1:64374603-64405149	42.949108	37.091213	40.087872	32.246765	50.154594	39.649620	38.198627	27.793074	36.254982	56.301285	34.911396	34.126797
ENSRNOG00000054371	Prkcg	1:64407114-64433636	62.973499	52.472801	80.201759	84.650986	52.219639	73.644493	68.272026	81.413986	80.333015	54.763988	59.601696	57.685558
ENSRNOG00000056036	LOC103691005	1:64738477-64749705	1.481451	0.849809	0.778126	0.788426	1.336747	1.915083	0.980031	1.445077	1.387637	1.569520	0.755682	1.108829
XLOC_019573	XLOC_019573	1:64719271-64732312	0.354238	0.330975	0.485875	0.333979	0.128143	0.235522	0.494509	0.261354	0.214842	0.398760	0.287955	0.204715
XLOC_004086	XLOC_004086	1:64719938-64732441	5.234942	1.401916	1.878772	4.961353	1.045651	5.514473	2.916191	1.536134	1.559129	1.584331	5.146522	1.451226
ENSRNOG00000056327	AABR07002010.1	1:64816762-64831065	0.356302	0.711191	0.306147	0.568779	0.660486	0.557180	0.231092	0.920215	0.461983	0.924485	0.662562	0.904375
ENSRNOG00000048100	AABR07002044.1	1:65292386-65310440	0.011612	0.0	0.000000	0.000000	0.0	0.009859	0.000000	0.052031	0.000000	0.070062	0.023737	0.026404
ENSRNOG00000054417	AABR07002025.1	1:65057370-65058502	0.000000	0.007601	0.000000	0.000000	0.004745	0.000000	0.000000	0.000000	0.000000	0.000000	0.000000	0.000000
ENSRNOG00000027550	Mzf1	1:65522118-65533212	3.930243	4.773884	4.588881	5.052271	4.867509	4.698421	4.102417	5.585487	4.308502	4.330097	5.716632	4.545339
ENSRNOG00000019626	Slc27a5	1:65576535-65587186	0.065516	0.038724	0.094782	0.030426	0.091085	0.161016	0.087071	0.023626	0.082993	0.095495	0.024426	0.020548
XLOC_004128	XLOC_004128	1:65568841-65574145	1.115689	1.231111	1.585447	1.779648	1.309265	1.537605	1.370179	1.197942	0.898964	1.438980	1.254304	1.635867
ENSRNOG00000038445	Rnf225	1:65657276-65659945	0.000000	0.039832	0.074040	0.038386	0.033321	0.042511	0.065412	0.002087	0.017670	0.130970	0.062506	0.056336
ENSRNOG00000060429	AABR07002065.2	1:65590372-65612490	2.794297	2.235648	2.308275	2.277181	2.563786	2.911415	2.445197	1.937287	2.205669	2.705924	2.344099	2.065744
ENSRNOG00000019623	AABR07002065.1	1:65597103-65597899	1.628706	0.923440	0.970897	0.490542	1.495085	1.070267	1.361244	0.924120	1.043504	1.845243	0.661192	1.797756
ENSRNOG00000027436	Zfp324	1:65606520-65611815	4.147829	3.411453	4.478033	3.781942	4.840590	4.633341	3.766248	3.535976	3.647493	4.657045	3.743123	3.622816
ENSRNOG00000027514	Ube2m	1:65537640-65541177	56.719398	45.153553	61.528568	45.670860	47.735889	49.728710	56.225182	38.477684	53.224464	41.420818	41.255726	40.430614
ENSRNOG00000043328	Chmp2a	1:65541322-65543707	41.745461	26.462139	38.597340	28.291412	33.418152	33.595623	40.511723	27.126175	32.537495	32.165306	26.605993	23.081648
ENSRNOG00000027487	Trim28	1:65544373-65551043	43.466408	31.424887	38.515926	33.714897	41.124691	39.387939	41.788612	30.934559	35.053768	45.485867	31.917324	33.010471
ENSRNOG00000027459	Zbtb45	1:65564173-65568300	11.098108	9.685767	11.855458	11.381910	10.513417	9.798762	11.874358	8.849599	11.085263	11.603683	9.684908	9.005251
ENSRNOG00000019453	Rps5	1:65660470-65664767	103.570381	61.503838	98.499565	59.627270	86.028839	84.843666	94.216629	46.029427	65.586479	87.271439	55.022007	63.209713
ENSRNOG00000031459	Zfp128	1:65691947-65701867	5.006899	3.262096	4.622714	3.557199	4.910613	4.352469	4.600498	3.464860	4.250471	4.745066	3.703626	3.468328
ENSRNOG00000031328	Zfp110	1:65737833-65756528	6.572133	5.547675	5.665945	4.676783	7.675492	6.573630	5.115004	3.805704	6.162546	8.203656	6.096801	4.413981
ENSRNOG00000019376	Zfp329	1:65738967-65804149	5.313688	1.646721	4.232574	4.970417	5.871494	4.781157	3.228686	5.061557	5.343388	6.119804	1.942852	3.426632
ENSRNOG00000026861	AABR07002071.1	1:65851060-65857872	5.860983	3.958302	4.723002	5.086446	5.091719	4.735279	6.087308	4.660412	4.285208	4.549668	4.111302	3.444925
XLOC_019637	XLOC_019637	1:65870316-65892463	0.000000	0.286404	0.000000	0.306129	0.000000	0.000000	0.000000	0.196696	0.000000	0.000000	0.000000	0.000000
ENSRNOG00000019127	Zfp606	1:66197553-66256907	1.628527	1.746331	1.271485	1.862536	1.435899	1.816953	1.232701	1.877633	1.251904	2.369724	1.762873	1.787421
XLOC_004198	XLOC_004198	1:66753524-66754473	0.000000	0.000000	0.000000	0.114305	0.110779	0.155799	0.365066	0.000000	0.0	0.095051	0.000000	0.000000
ENSRNOG00000055247	LOC100365062	1:66637868-66639205	3.617071	2.892600	3.458531	2.725000	2.913601	3.916713	3.836711	3.054942	3.216286	3.317079	2.419797	2.811014
ENSRNOG00000047230	AABR07002134.1	1:66898946-66904539	5.439413	3.549479	4.567453	4.333684	3.975185	4.529518	4.259958	4.185609	4.397225	3.494465	3.837536	4.107648
XLOC_019666	XLOC_019666	1:66930106-66945596	0.137014	0.306522	0.170899	0.347821	0.096058	0.166383	0.082084	0.391385	0.186554	0.151924	0.407248	0.374219
XLOC_019678	XLOC_019678	1:66956287-66958714	0.012501	0.249662	0.017621	0.112621	0.066062	0.099333	0.000000	0.257641	0.180942	0.047208	0.170303	0.442350
ENSRNOG00000031210	Vmn1r83	1:66959610-66970140	0.000000	0.000000	0.000000	0.000000	0.0	0.034799	0.0	0.000000	0.000000	0.000000	0.000000	0.033751
ENSRNOG00000032062	AABR07002140.2	1:66963035-66963784	0.000000	0.000000	0.000000	0.000000	0.0	0.000000	0.0	0.000000	0.000000	0.000000	0.000000	0.000000
XLOC_004208	XLOC_004208	1:66974717-67023930	0.105422	0.392064	0.096967	0.483539	0.163409	0.237282	0.082878	0.588015	0.257750	0.199678	0.604736	0.551078
ENSRNOG00000034101	Vom1r47	1:67025240-67026154	0.064895	0.297219	0.0	0.592571	0.123057	0.181328	0.0	0.630748	0.235904	0.123464	0.694317	0.908267
ENSRNOG00000032817	Vom1r46	1:67064847-67065797	0.000000	0.032376	0.0	0.000000	0.0	0.000000	0.0	0.033979	0.0	0.000000	0.0	0.000000
ENSRNOG00000047429	AABR07071871.1	1:67092448-67094567	0.000000	0.000000	0.0	0.000000	0.0	0.000000	0.0	0.0	0.0	0.000000	0.0	0.000000
ENSRNOG00000052304	AC096201.1	1:67108474-67171433	0.068529	0.472069	0.036549	0.411179	0.095970	0.206892	0.017894	0.883595	0.139982	0.224610	0.685908	0.669854
XLOC_004221	XLOC_004221	1:67126104-67127786	0.082541	0.156956	0.000000	0.179351	0.223362	0.250197	0.000000	0.358213	0.261123	0.114393	0.478772	0.145911
ENSRNOG00000028882	Vom1r45	1:67133880-67134827	0.000000	0.032370	0.000000	0.000000	0.000000	0.000000	0.000000	0.064197	0.000000	0.000000	0.042967	0.000000
ENSRNOG00000033483	Vom1r44	1:67174732-67175736	0.000000	0.000000	0.0	0.000000	0.0	0.000000	0.0	0.064307	0.0	0.000000	0.038369	0.000000
ENSRNOG00000032226	Vom1r43	1:67205796-67206713	0.048838	0.061022	0.000000	0.038478	0.0	0.0	0.0	0.0	0.000000	0.000000	0.022186	0.072174
ENSRNOG00000028877	Vom1r42	1:67301831-67302751	0.000000	0.000000	0.000000	0.000000	0.000000	0.000000	0.000000	0.023508	0.000000	0.000000	0.000000	0.000000
XLOC_019708	XLOC_019708	1:67421156-67524292	0.519119	0.130565	0.0	0.000000	0.000000	0.0	0.0	0.0	0.0	0.0	0.000000	0.000000
XLOC_019725	XLOC_019725	1:68063488-68068915	0.000000	0.000000	0.0	0.000000	0.000000	0.052901	0.000000	0.000000	0.000000	0.241123	0.064822	0.000000
XLOC_004308	XLOC_004308	1:68066434-68101230	0.000000	0.147246	0.0	0.114831	0.139166	0.043814	0.070664	0.591663	0.146979	0.167039	0.122598	0.299947
ENSRNOG00000047242	LOC100911184	1:68239314-68240174	0.000000	0.000000	0.000000	0.000000	0.000000	0.000000	0.000000	0.000000	0.000000	0.000000	0.000000	0.000000
ENSRNOG00000019082	LOC103690016	1:67368384-67390141	11.432350	6.328352	10.210787	6.389393	10.767781	11.231081	9.737774	6.001845	8.015038	8.773022	6.500432	6.579177
ENSRNOG00000046455	Zik1	1:68262389-68269117	3.203282	0.000000	2.963584	2.160800	3.015368	2.852896	2.850709	2.333745	2.279286	2.648365	2.078303	1.888888
XLOC_019743	XLOC_019743	1:68892088-68893105	0.137706	0.302128	0.222686	0.133194	0.317375	0.073630	0.000000	0.124456	0.170150	0.245859	0.206893	0.302224
XLOC_019744	XLOC_019744	1:68893165-68895555	0.150756	0.276248	0.000000	0.116985	0.623715	0.315657	0.142366	0.068377	0.235789	0.442019	0.367319	0.135393
XLOC_004325	XLOC_004325	1:69131298-69137334	0.000000	0.000000	0.432625	0.000000	0.240924	0.000000	0.0	0.122526	0.000000	0.225659	0.000000	0.000000
XLOC_019753	XLOC_019753	1:69266387-69268147	0.870740	0.814883	0.737908	0.895432	0.662387	0.618977	1.022006	0.557814	0.736833	0.711708	0.732838	0.645406
ENSRNOG00000055229	LOC108348118	1:68436593-68488427	19.785856	14.070243	20.981358	20.810417	17.744942	18.710028	18.514366	17.384756	18.370037	13.429770	16.180916	16.376860
XLOC_019758	XLOC_019758	1:69471653-69472517	0.092732	0.162382	0.202402	0.158952	0.191197	0.204592	0.000000	0.322626	0.000000	0.289666	0.000000	0.523461
ENSRNOG00000047013	Prrg3	1:69285579-69287538	3.989616	3.056579	4.097209	4.457269	0.000000	3.235370	3.129942	3.881130	4.400798	2.287786	2.960287	3.091802
ENSRNOG00000015271	Zfp418	1:69615434-69629913	2.762908	2.438354	2.574972	2.150105	2.678855	2.625566	2.790895	1.890406	2.310411	2.640456	2.270752	1.927615
ENSRNOG00000056113	RF00100	1:69630339-69630619	0.299241	0.146216	0.156762	0.192326	0.048857	0.152944	0.395921	0.141447	0.091019	0.305541	0.124664	0.581602
ENSRNOG00000060875	RF00100	1:69687340-69687515	0.103025	0.402828	0.123011	0.291679	0.061648	0.273106	0.164293	0.390465	0.126276	0.056699	0.065574	0.069016
ENSRNOG00000015598	Zfp772	1:69736684-69743616	0.615679	0.900283	0.792361	0.706636	0.965221	0.850928	0.709489	0.693825	0.704100	0.904460	0.509942	0.560040
ENSRNOG00000050407	Mfsd14a	1:69788609-69820981	10.627947	9.657456	12.070602	13.087445	10.603567	10.996883	12.523566	11.091611	10.588138	10.218269	0.000000	0.000000
ENSRNOG00000046153	LOC108349745	1:69823107-69835185	0.276031	1.272116	0.749133	0.471240	0.964732	0.990501	0.694559	0.474599	0.571782	0.000000	0.741035	0.893989
ENSRNOG00000047061	Zfp773-ps1	1:69841998-69846125	1.556926	0.739389	1.085963	1.257018	1.547681	1.538434	1.402000	0.715658	1.229271	1.848654	1.170162	1.009995
ENSRNOG00000022742	Zfp954	1:69853553-69859391	4.289897	2.636401	3.956693	3.748579	4.282636	3.486112	3.869198	3.015569	3.998975	3.908201	2.363138	2.721170
ENSRNOG00000059513	LOC102547412	1:69866069-69879804	0.000000	0.0	0.0	0.0	0.000000	0.0	0.000000	0.0	0.0	0.0	0.0	0.0
ENSRNOG00000015071	Zim1	1:70253650-70266809	3.505631	0.374981	0.691675	0.407088	2.573293	1.623030	2.627045	0.356031	0.321439	1.678114	0.663067	0.410797
XLOC_004408	XLOC_004408	1:70595336-70603718	0.582473	1.047516	1.281922	1.077918	0.833258	1.431617	1.880994	1.348241	0.969308	0.490860	1.116630	0.981091
XLOC_004409	XLOC_004409	1:70596422-70604693	1.609636	1.853447	2.715281	2.278924	2.809947	4.227399	4.190672	2.816740	2.140078	1.137390	1.823056	2.435615
XLOC_019825	XLOC_019825	1:70596584-70604744	0.000000	0.044464	0.000000	0.349779	0.321617	0.000000	0.072643	0.179701	0.291628	0.352309	0.395331	0.485672
ENSRNOG00000042777	Zfp28	1:71167156-71173216	2.797312	1.795291	1.784576	2.226151	2.480827	2.714840	2.368185	1.995866	1.893036	3.158885	2.108192	1.869286
XLOC_019828	XLOC_019828	1:71173312-71175977	0.153800	0.249072	0.322020	0.121258	0.394139	0.295581	0.147506	0.132424	0.107640	0.211226	0.326525	0.345567
ENSRNOG00000015322	Zfp78	1:71183171-71190423	1.658357	1.315315	1.329976	1.548169	1.766847	1.591130	1.139076	1.807138	0.978444	1.490341	1.625907	1.533194
XLOC_004427	XLOC_004427	1:71293071-71296327	0.115599	0.323347	0.168434	0.394767	0.414001	0.266861	0.112703	0.083025	0.409277	0.047282	0.153677	0.073053
XLOC_004433	XLOC_004433	1:71302335-71313796	0.000000	0.437086	0.324998	0.221739	0.201748	0.342711	0.595980	0.000000	0.245133	0.296649	0.131644	0.125440
ENSRNOG00000049014	Zscan5b	1:71335129-71342633	0.021153	0.0	0.0	0.0	0.0	0.0	0.0	0.000000	0.0	0.000000	0.000000	0.0
ENSRNOG00000033906	Zfp667	1:71270107-71290337	10.241301	3.018079	6.651346	3.399845	6.432286	7.977231	7.513503	3.345144	4.337059	4.752606	4.309009	3.424669
ENSRNOG00000021913	Nlrp9	1:71859390-71909138	0.000000	0.334929	0.142339	0.000000	0.171326	0.134448	0.0	0.432085	0.078926	0.231223	0.233800	0.217377
ENSRNOG00000032913	Rasl2-9	1:72272032-72273210	0.049519	0.012490	0.094542	0.014980	0.027702	0.014389	0.013175	0.022658	0.051347	0.051742	0.0	0.000000
ENSRNOG00000015456	Zfp787	1:71416110-71447195	5.516930	4.235826	4.861140	3.760658	4.807613	4.424666	4.545235	4.074364	4.150178	5.239922	2.739447	3.709053
XLOC_019806	XLOC_019806	1:69938831-69957613	0.139066	0.514048	0.141746	0.392550	0.315635	0.318154	0.101133	0.624097	0.299417	0.297264	0.488581	0.343601
XLOC_004375	XLOC_004375	1:69943314-69944052	0.000000	0.299896	0.000000	0.000000	0.080979	0.000000	0.000000	0.000000	0.000000	0.000000	0.000000	0.000000
ENSRNOG00000015825	Aurkc	1:69957691-69978891	1.435453	1.171522	2.059442	1.301377	1.786965	2.215053	1.023553	1.257459	1.385012	2.375905	1.477854	1.233308
XLOC_019807	XLOC_019807	1:69966564-69979102	3.883127	4.811190	3.713710	4.235254	5.111341	4.256517	3.038859	4.113114	3.379843	4.772019	3.749122	3.642598
XLOC_004378	XLOC_004378	1:69966566-69985051	0.901339	0.363962	0.478564	0.704234	0.685664	0.285438	0.416994	0.575258	0.504558	0.432313	0.584668	0.318482
ENSRNOG00000055983	AABR07002258.1	1:69966566-70210674	3.590452	1.156090	2.702489	0.909051	2.096730	1.244954	2.451598	1.236152	1.754198	1.750750	1.087005	1.408920
ENSRNOG00000015956	Usp29	1:69985485-70210658	34.486919	13.172400	18.353245	14.953053	26.259266	20.216391	29.661774	13.751042	16.760790	24.774193	12.760344	12.972298
ENSRNOG00000046704	Mir3099	1:70037000-70210658	2.581432	1.292810	0.949276	1.154416	2.388671	2.011729	1.608800	0.797282	0.967945	2.074575	2.331563	1.369650
ENSRNOG00000057261	RF00017	1:70101606-70101912	0.000000	0.000000	0.000000	0.000000	0.069242	0.000000	0.000000	0.000000	0.000000	0.000000	0.000000	0.000000
ENSRNOG00000048353	Apeg3	1:70210774-70237446	15.863039	6.183314	8.360451	5.548555	7.542687	6.744435	11.367483	5.256205	6.727772	7.485398	5.520154	5.057845
ENSRNOG00000014791	Peg3	1:70222964-70237443	158.965958	72.163628	87.429314	76.951279	111.986183	89.155991	125.715614	71.613403	86.024017	95.509560	70.682747	65.712006
ENSRNOG00000015753	Epn1	1:72294153-72311856	95.130051	81.940910	106.248375	92.308846	93.167953	95.339851	102.551620	75.054588	99.700859	79.988762	80.644608	85.903618
ENSRNOG00000038625	Sbk2	1:72425707-72433488	0.012708	0.0	0.013671	0.0	0.014122	0.000000	0.0	0.027478	0.0	0.024016	0.017376	0.0
ENSRNOG00000016608	Zfp579	1:72399157-72402327	4.196271	3.552684	4.475477	4.470956	4.429232	4.125256	4.623224	4.085158	4.806988	4.894208	3.742831	4.292588
ENSRNOG00000015914	U2af2	1:72312727-72329856	45.669086	35.147518	45.385143	43.738983	47.855721	43.990135	48.917290	37.081707	40.076530	48.214264	36.046837	37.144417
ENSRNOG00000016274	Zfp580	1:72338031-72340702	15.897770	14.584690	15.198504	14.993069	9.710549	9.106026	8.774371	6.822159	6.938328	22.658697	12.376389	15.564730
ENSRNOG00000054623	RF00026	1:72342447-72342553	0.450658	0.000000	0.000000	0.009904	0.088986	0.000000	0.000000	0.279856	0.000000	0.000000	0.000000	0.000000
ENSRNOG00000016279	Zfp865	1:72356880-72361358	2.358813	2.072771	2.397409	1.557443	2.537787	2.928064	2.969103	1.659368	2.446247	2.458467	2.079961	2.078938
ENSRNOG00000046037	AABR07002384.1	1:72360757-72361101	1.630738	1.531182	1.494281	0.806448	2.187349	2.531758	2.270101	1.202343	0.884828	1.664255	2.350319	1.954055
ENSRNOG00000016574	Fiz1	1:72361806-72387301	6.228071	3.244770	4.809169	5.088579	5.625147	5.086204	5.493340	3.456665	4.533102	4.718301	3.838503	4.183885
ENSRNOG00000016565	Zfp524	1:72376386-72387288	5.006299	2.155713	4.658998	3.082996	5.037864	3.962722	4.961063	3.122991	3.988233	3.798444	3.580724	3.287788
ENSRNOG00000016687	Ssc5d	1:72443126-72462123	0.325698	0.530384	0.265801	0.340691	0.631898	0.445294	0.219956	0.416508	0.411454	0.500476	0.752989	0.563163
ENSRNOG00000042414	Nat14	1:72462405-72464492	14.625170	10.301561	16.151485	12.720986	11.360637	12.835591	15.503285	11.121467	11.654403	12.488914	11.535724	10.209837
ENSRNOG00000038622	Zfp628	1:72465341-72468738	4.182395	3.694105	3.873351	3.996737	4.181410	3.622821	3.964387	3.757654	3.560930	4.489902	3.521977	3.754100
ENSRNOG00000050348	LOC684270	1:72485765-72509431	6.923738	3.614112	6.918500	3.934104	3.710018	3.908762	4.542631	3.200158	4.589455	4.923789	3.464525	3.629363
ENSRNOG00000016829	Isoc2b	1:72524569-72545329	3.698749	2.948730	3.342038	1.956924	3.061713	3.083444	2.986763	2.576650	3.494543	3.614856	2.126245	3.091310
ENSRNOG00000016930	Ube2s	1:72580424-72584482	61.226734	36.586994	55.299698	40.621010	47.939198	48.535164	52.802841	33.594162	42.790791	42.904869	32.421844	33.975288
ENSRNOG00000017386	Il11	1:72635267-72643255	0.071181	0.064590	0.093914	0.040627	0.097086	0.032945	0.027524	0.000000	0.054769	0.090706	0.0	0.059369
ENSRNOG00000042528	Tmem190	1:72630238-72632185	0.000000	0.028602	0.000000	0.0	0.034242	0.000000	0.0	0.022555	0.030230	0.000000	0.0	0.000000
ENSRNOG00000017127	Rpl28	1:72619282-72622254	45.922874	30.504976	43.460663	30.384842	40.812103	37.364609	41.810833	24.947845	34.364559	37.328476	30.506033	27.749744
ENSRNOG00000033173	Fam71e2	1:72644333-72748072	0.154772	0.309069	0.206180	0.396334	0.264084	0.295236	0.071383	0.976433	0.315379	0.331941	0.270818	0.297688
ENSRNOG00000038616	Cox6b2	1:72661211-72662434	1.558875	1.009038	1.006335	0.613261	2.538443	1.932534	1.321334	0.688647	0.528378	2.584881	0.984527	1.173332
ENSRNOG00000017508	Kmt5c	1:72666498-72674271	2.044248	2.272668	1.624092	2.800389	3.155797	2.945616	1.912547	2.454662	1.847614	3.576244	2.607495	2.494886
ENSRNOG00000058451	RF00026	1:72675746-72675808	0.096466	0.000000	0.107178	0.000000	0.000000	0.000000	0.000000	0.000000	0.000000	0.000000	0.135777	0.000000
ENSRNOG00000028273	Tmem150b	1:72692105-72701593	0.394968	0.522358	0.605424	0.441360	0.349683	0.589432	0.355123	0.330235	0.523076	0.446861	0.465892	0.438526
ENSRNOG00000017673	Brsk1	1:72701610-72727112	117.089424	120.801247	146.103943	130.318619	119.683502	130.547653	132.403976	109.122345	166.209259	89.727890	126.040421	129.686981
ENSRNOG00000017795	Hspbp1	1:72732668-72756082	25.762907	18.874464	30.118893	26.162979	22.611521	23.709915	26.877516	22.638889	26.200756	21.151012	17.821007	20.584009
ENSRNOG00000018090	Ppp6r1	1:72756809-72784482	32.314663	31.824326	33.038754	34.141396	32.740353	31.615360	33.143364	29.744570	32.323956	32.859013	32.890583	34.680321
ENSRNOG00000038607	Tmem86b	1:72784966-72787367	0.585193	0.622476	0.374223	0.634751	0.702170	0.695951	0.429521	0.754160	0.480990	0.998091	0.893546	0.504627
ENSRNOG00000038600	Dnaaf3	1:72874404-72883002	1.204589	0.831852	0.585985	0.669292	0.822470	0.874376	1.221259	0.426881	0.833149	0.358149	0.789933	0.377131
ENSRNOG00000018250	Tnni3	1:72882806-72886488	0.272111	0.074962	0.000000	0.000000	0.363390	0.229300	0.667031	0.060438	0.000000	0.196637	0.120879	0.376990
ENSRNOG00000028041	Tnnt1	1:72889270-72899659	1.917615	0.880698	0.610122	0.529831	1.406667	0.826810	2.141912	0.362963	0.154589	0.945720	0.429951	0.494791
ENSRNOG00000058906	Ptprh	1:72810545-72859161	0.050175	0.008372	0.036949	0.077848	0.053765	0.071109	0.029623	0.024003	0.076757	0.253461	0.058612	0.041846
ENSRNOG00000018217	Syt5	1:72860218-72867930	67.901009	60.908009	93.812737	81.916824	51.812744	65.345863	88.831642	75.651718	82.950569	53.340488	53.394215	60.052643
XLOC_019935	XLOC_019935	1:72950671-72951436	0.108719	0.0	0.0	0.107701	0.0	0.121766	0.0	0.0	0.000000	0.0	0.0	0.361100
XLOC_004532	XLOC_004532	1:73009624-73015299	0.309021	0.557384	0.177699	0.376769	0.232643	0.244327	0.098018	0.291093	0.089278	0.391816	0.448940	0.157358
ENSRNOG00000047204	Gp6	1:73040901-73064641	0.017540	0.050450	0.100284	0.057569	0.051979	0.052541	0.092720	0.000000	0.040902	0.032891	0.031182	0.186639
ENSRNOG00000018458	Ncr1	1:73179013-73226777	0.003614	0.0	0.0	0.000000	0.0	0.011030	0.0	0.0	0.0	0.0	0.0	0.0
ENSRNOG00000053828	Ppp1r12c	1:72903257-72926108	33.608578	31.267353	34.207787	35.621788	32.633198	33.028965	34.975716	31.829214	33.773178	30.906849	30.557554	33.083221
ENSRNOG00000027942	Eps8l1	1:72927151-72941869	0.068916	0.080110	0.050341	0.018455	0.075486	0.087983	0.117114	0.008442	0.076384	0.056670	0.060047	0.017308
ENSRNOG00000027811	Lilrb4	1:73393850-73399579	0.011741	0.008708	0.007240	0.0	0.0	0.000000	0.000000	0.0	0.0	0.079818	0.0	0.018296
ENSRNOG00000027919	Rdh13	1:72956026-72984350	5.759197	3.364998	5.089676	4.231825	4.965469	3.993593	4.984932	3.896712	4.905207	4.652047	2.999138	3.760697
ENSRNOG00000053253	RF00100	1:72978028-72978324	0.000000	0.000000	0.106817	0.000000	0.000000	0.000000	0.000000	0.011243	0.000000	0.000000	0.000000	0.000000
XLOC_004554	XLOC_004554	1:73504891-73511614	0.000000	0.144844	0.052253	0.122998	0.125277	0.054954	0.000000	0.384027	0.182783	0.198649	0.096785	0.119335
ENSRNOG00000046683	Lilrb3	1:73610149-73619356	0.046781	0.036880	0.170801	0.069632	0.235916	0.072029	0.000000	0.000000	0.128225	0.167733	0.057152	0.167074
ENSRNOG00000027808	Lilra5	1:73656028-73682247	0.331296	0.115538	0.111428	0.117411	0.261231	0.247789	0.279449	0.054464	0.331169	0.161060	0.021786	0.149256
XLOC_004552	XLOC_004552	1:73469070-73503435	0.169363	0.485561	0.300366	0.386948	0.545007	0.302340	0.156884	0.772945	0.572163	0.539330	0.366314	0.250511
ENSRNOG00000048095	RGD1564801	1:75152883-75154325	0.043428	0.426027	0.077914	0.079148	0.074808	0.058822	0.124086	0.105288	0.356954	0.379338	0.111407	0.053874
ENSRNOG00000026764	Pla2g4c	1:75428027-75620911	0.000000	0.003792	0.000000	0.000000	0.000000	0.000000	0.000000	0.000000	0.000000	0.000000	0.000000	0.000000
ENSRNOG00000056949	RF00100	1:75450297-75450635	0.000000	0.000000	0.000000	0.000000	0.000000	0.000000	0.000000	0.000000	0.000000	0.000000	0.000000	0.000000
ENSRNOG00000056331	AC127640.1	1:75455599-75462453	0.001721	0.026963	0.012523	0.016890	0.000000	0.018754	0.010731	0.009125	0.006030	0.006549	0.026785	0.024460
ENSRNOG00000054798	RF00100	1:75508664-75509002	0.000000	0.000000	0.000000	0.000000	0.000000	0.000000	0.000000	0.000000	0.000000	0.000000	0.000000	0.000000
ENSRNOG00000047206	LOC100911727	1:75233703-75264293	3.479058	1.960871	1.689658	0.367840	2.240934	1.950672	1.009140	0.545993	1.711385	2.420265	1.310035	1.426056
ENSRNOG00000014181	Vom1r61	1:75298364-75299317	0.000000	0.000000	0.0	0.0	0.0	0.000000	0.0	0.0	0.0	0.000000	0.0	0.0
ENSRNOG00000032819	Vom1r62	1:75326217-75327164	0.000000	0.000000	0.0	0.0	0.0	0.000000	0.0	0.0	0.0	0.000000	0.0	0.0
ENSRNOG00000014186	Zswim9	1:75335894-75354820	3.229233	3.025946	2.896327	2.455907	3.053688	3.006290	3.118011	2.644370	3.133753	3.036408	2.626245	2.682845
ENSRNOG00000014193	Lig1	1:75356220-75394758	1.580509	1.078587	1.133287	1.184549	1.506378	2.038404	2.166490	1.246822	0.868034	1.883870	0.905524	0.724087
XLOC_020028	XLOC_020028	1:76997647-77003764	0.060997	0.292531	0.196858	0.103860	0.0	0.337909	0.000000	0.131895	0.0	0.0	0.100593	0.522832
ENSRNOG00000047986	Sult2a2	1:76252329-76780230	0.000000	0.000000	0.000000	0.000000	0.000000	0.000000	0.000000	0.000000	0.000000	0.000000	0.000000	0.000000
ENSRNOG00000054447	RF00026	1:76281359-76281465	0.000000	0.000000	0.000000	0.000000	0.000000	0.000000	0.000000	0.000000	0.000000	0.000000	0.000000	0.000000
ENSRNOG00000031005	AABR07002523.1	1:76336837-76346029	0.000000	0.000000	0.000000	0.000000	0.000000	0.000000	0.000000	0.000000	0.000000	0.000000	0.000000	0.000000
ENSRNOG00000048028	AABR07002546.1	1:76651142-76653153	2.733136	2.132340	2.363780	2.216851	2.337403	2.398135	2.794699	1.793671	2.024342	2.608913	1.690059	2.214497
ENSRNOG00000052468	RF00026	1:76751014-76751120	0.000000	0.000000	0.000000	0.000000	0.000000	0.000000	0.000000	0.000000	0.000000	0.000000	0.000000	0.000000
ENSRNOG00000018616	Cdc42ep5	1:73719005-73719529	1.870368	2.032418	2.937091	3.076925	3.092858	2.108364	1.180510	0.646082	2.154364	0.980598	1.491736	3.221066
ENSRNOG00000018621	Leng9	1:73721114-73722631	3.343550	3.384762	3.008349	2.368388	3.575778	3.144408	3.329499	2.377293	3.081186	3.042094	2.875521	2.862205
ENSRNOG00000018642	Leng8	1:73722088-73733788	8.572456	16.911160	8.275355	14.225360	13.947032	13.102586	8.077495	15.387012	11.142841	17.628801	22.055069	12.269831
ENSRNOG00000032699	Ttyh1	1:73734624-73753128	195.976135	160.316071	205.723114	173.619766	194.119110	195.128876	201.795578	135.937088	205.524628	168.014374	150.952591	161.423172
XLOC_004565	XLOC_004565	1:73761127-73765873	0.061265	1.515237	0.159422	1.235797	0.239811	1.808443	0.071470	0.333565	0.274054	0.329230	1.278390	1.122088
ENSRNOG00000027733	Lair1	1:73806282-73868695	0.902266	0.360570	0.726661	0.497218	1.116125	0.648802	0.780416	1.208113	0.893066	1.129972	0.738286	0.438625
ENSRNOG00000027705	Nlrp4b	1:73929674-73961432	0.000000	0.0	0.0	0.0	0.0	0.0	0.0	0.0	0.0	0.000000	0.0	0.0
XLOC_004612	XLOC_004612	1:74023160-74091022	0.044704	0.335157	0.000000	0.424449	0.134428	0.089623	0.000000	0.696035	0.105659	0.203853	0.220499	0.217692
ENSRNOG00000013548	Selenow	1:77530691-77535799	198.865448	168.097092	225.762375	210.323975	171.622162	254.672379	200.485046	135.104736	222.531601	158.657837	247.252365	117.020775
ENSRNOG00000051483	LOC103689961	1:77530691-77808996	72.736015	175.692001	200.917023	207.640503	143.678070	14.977035	167.595367	144.240067	150.912674	8.913223	67.039749	138.594193
ENSRNOG00000038251	AABR07002623.1	1:77530697-77808579	10.682861	11.254984	15.653992	12.953853	7.848348	7.621838	11.710342	5.130381	11.353748	5.063281	6.757512	6.855413
ENSRNOG00000033146	LOC103690015	1:77541359-77541814	3.373697	2.048922	1.657070	1.467687	1.628245	1.454526	2.134643	0.932982	0.980982	1.561401	3.186639	0.864775
XLOC_020039	XLOC_020039	1:77578557-77579537	0.000000	0.000000	0.029611	0.028372	0.000000	0.077125	0.000000	0.084965	0.032441	0.291838	0.041108	0.000000
ENSRNOG00000038276	AABR07002622.1	1:77721411-77721737	0.000000	0.000000	0.000000	0.000000	0.000000	0.000000	0.000000	0.000000	0.000000	0.000000	0.000000	0.000000
ENSRNOG00000013890	Crx	1:77745288-77750960	0.000000	0.000000	0.000000	0.000000	0.000000	0.000000	0.000000	0.000000	0.000000	0.000000	0.000000	0.000000
ENSRNOG00000028449	LOC100364457	1:77829711-77830399	24.174917	16.456610	21.979307	15.044518	20.226641	19.854050	22.819595	8.456686	17.309958	18.688076	15.128478	14.229177
ENSRNOG00000021390	Meis3	1:78068931-78079862	9.822997	7.215174	8.719150	5.828884	9.900575	9.342763	7.931910	5.953611	7.564107	8.989431	7.107290	5.884389
ENSRNOG00000047575	Dhx34	1:78090044-78112488	2.489641	1.656400	2.760408	2.202145	2.880261	2.407757	2.228802	1.742481	2.159487	2.670938	1.487289	1.709025
ENSRNOG00000060587	AABR07002627.1	1:78112559-78149053	0.068003	0.000000	0.000000	0.000000	0.010946	0.030764	0.013885	0.000000	0.000000	0.011893	0.000000	0.023824
ENSRNOG00000049028	C5ar2	1:78166810-78180216	1.511952	0.621725	1.243570	1.011343	0.968107	1.049131	0.865685	0.297448	0.880331	1.057723	0.935092	0.955781
XLOC_004755	XLOC_004755	1:78202668-78203705	0.000000	0.0	0.280168	0.0	0.000000	0.0	0.0	0.0	0.0	0.0	0.0	0.0
ENSRNOG00000047800	C5ar1	1:78186776-78195328	1.202803	0.395791	0.453006	0.253598	0.557835	0.347820	0.457718	0.165715	0.192774	0.435802	0.396469	0.466903
ENSRNOG00000013023	Nop53	1:77836196-77844189	28.164852	23.119148	26.358824	16.150688	23.932655	24.857038	27.153549	15.574891	20.834690	25.327337	22.258501	16.425425
ENSRNOG00000059444	RF00603	1:77837118-77837226	0.239475	0.000000	0.000000	0.000000	0.610458	0.099609	0.000000	0.000000	0.000000	0.328199	0.301450	0.182024
ENSRNOG00000011346	Ehd2	1:77847600-77865870	2.919910	3.908907	2.749937	2.653146	3.294832	2.645670	3.295124	2.293835	3.194775	3.759338	3.529330	2.613009
ENSRNOG00000011262	Bicra	1:77859674-77942899	3.499444	4.366225	3.851853	3.988544	5.283831	4.071285	3.811687	3.747150	4.118388	5.290639	4.459413	4.429984
XLOC_020054	XLOC_020054	1:77893781-77896641	0.366169	0.600055	0.387011	0.311637	0.790488	0.570086	0.249099	0.416861	0.485905	0.609472	0.614873	0.380629
ENSRNOG00000021800	Zfp541	1:77967755-77992232	0.212296	0.252126	0.432759	0.352260	0.302108	0.403417	0.212541	0.163923	0.310073	0.426491	0.291825	0.379072
ENSRNOG00000001494	Napa	1:77994203-78012845	70.745178	70.868904	95.152626	75.624321	64.800453	65.457657	86.049812	76.733910	92.718300	59.792660	68.178055	73.048233
ENSRNOG00000001493	Kptn	1:78015722-78023676	11.270430	9.519056	12.945780	9.621871	10.291927	10.163465	12.098172	10.098501	8.860479	9.967433	9.854424	9.398458
ENSRNOG00000001492	Slc8a2	1:78025995-78060111	58.326431	88.148819	109.353516	131.262161	51.163548	77.950089	83.210579	118.820839	110.235924	49.943939	78.896446	98.279396
ENSRNOG00000049661	Inafm1	1:78210867-78212350	4.376222	3.286086	3.832993	3.043362	3.771855	3.259496	2.966645	2.196461	2.959158	3.579274	4.213569	3.181214
ENSRNOG00000048848	Ccdc9	1:78213223-78226384	8.975917	11.078056	8.960724	10.331532	9.905725	9.405813	7.664296	9.782449	10.053561	9.300548	12.913243	10.245704
ENSRNOG00000015128	Sae1	1:78277515-78333321	26.309362	22.691280	32.455467	28.987856	26.537405	25.252659	26.890133	27.010143	27.969179	27.884012	20.014462	22.949968
ENSRNOG00000015229	Zc3h4	1:78354934-78390907	12.696947	9.474471	13.112679	9.368287	12.533898	12.389307	12.744043	9.039511	11.169857	12.023908	9.796976	9.603489
ENSRNOG00000015304	Tmem160	1:78417719-78441831	4.851500	3.822889	4.786462	3.929068	4.526746	4.089497	5.325984	3.972677	4.893850	4.218720	5.827109	3.580203
ENSRNOG00000015376	Npas1	1:78420652-78440738	2.355173	2.878065	3.693911	5.082622	2.144722	2.164001	3.095413	4.360791	4.240178	1.378344	2.807508	3.901428
XLOC_004787	XLOC_004787	1:78638309-78639577	0.062203	0.032484	0.0	0.000000	0.000000	0.150868	0.081912	0.267885	0.0	0.000000	0.335208	0.095833
ENSRNOG00000038205	LOC108349548	1:78456408-78581629	5.129553	3.360244	4.567782	2.623690	2.618630	2.619513	2.910446	2.175307	3.615165	3.677644	2.789763	4.521403
ENSRNOG00000028617	LOC108349752	1:78622590-78626284	0.103649	0.024924	0.000000	0.045628	0.000000	0.000000	0.000000	0.041252	0.000000	0.000000	0.0	0.000000
ENSRNOG00000034106	AC127887.1	1:78686608-78686952	0.310149	0.070739	0.200066	0.117401	0.171047	0.040650	0.116821	0.041525	0.258573	0.036292	0.0	0.030087
ENSRNOG00000015865	Ap2s1	1:78671121-78682871	73.717949	60.759487	82.655182	77.968460	61.621544	66.884140	78.455452	77.253761	74.360886	63.047462	59.330166	63.622257
ENSRNOG00000027288	Psgb1	1:79154120-79202693	0.064694	0.330469	0.092795	0.888783	0.214401	0.326401	0.000000	0.779648	0.430528	0.531158	0.967562	0.267061
XLOC_020152	XLOC_020152	1:79155461-79158402	0.000000	0.080929	0.000000	0.175485	0.254712	0.000000	0.000000	0.128543	0.000000	0.069236	0.000000	0.139382
XLOC_004850	XLOC_004850	1:79155848-79158427	0.011622	0.270350	0.055514	0.322273	0.289627	0.229164	0.096278	0.344815	0.260675	0.412176	0.467543	0.546618
ENSRNOG00000017699	Mill1	1:79631668-79657941	0.053941	0.011248	0.035594	0.0	0.258648	0.123714	0.060093	0.068949	0.034326	0.080106	0.049243	0.110960
ENSRNOG00000026891	AC093995.1	1:79727597-79728113	0.000000	0.383155	0.000000	0.000000	0.000000	0.061545	0.000000	0.0	0.088634	0.187527	0.000000	0.000000
ENSRNOG00000016907	Ppp5c	1:78944040-78968329	41.050362	30.988710	40.624756	36.784813	30.559240	31.958384	36.895123	33.631798	35.642956	32.601665	29.608929	27.227070
ENSRNOG00000017198	Hif3a	1:78976318-78997869	2.066613	1.267805	1.072184	0.328414	2.652047	2.598435	2.201866	0.370852	2.309619	1.588709	1.448276	0.312243
ENSRNOG00000057645	Micb	1:79754587-79785769	0.567683	0.440343	0.404903	0.251199	1.007443	0.880713	0.439458	0.232116	0.627743	0.938219	0.710363	0.450034
XLOC_004874	XLOC_004874	1:79781603-79785769	0.230901	0.436719	0.064565	0.152910	0.107879	0.129913	0.559364	0.566764	0.194737	0.431940	0.000000	0.230997
ENSRNOG00000013395	Pglyrp1	1:79781603-79796409	0.436943	0.304879	0.174544	0.290026	0.611316	0.554768	0.273430	0.287453	0.504005	0.378336	0.385310	0.207303
XLOC_020173	XLOC_020173	1:79782333-79785228	0.000000	0.239860	0.083935	0.567432	0.165315	0.154431	0.000000	0.126748	0.000000	0.137728	0.000000	0.000000
ENSRNOG00000013767	Ccdc61	1:79789769-79816450	1.736087	1.481746	1.462487	0.999167	1.791054	1.434549	1.786525	1.115268	1.308439	1.199271	1.560081	0.907305
ENSRNOG00000015948	Slc1a5	1:78710539-78724794	1.332443	0.597388	0.902478	0.572700	1.191111	1.025022	1.028090	0.254868	0.962371	0.717841	0.571091	0.427623
XLOC_020106	XLOC_020106	1:78725449-78726190	0.124464	0.230597	0.148015	0.000000	0.195277	0.274998	0.102663	0.145033	0.125705	0.264189	0.347675	0.330755
ENSRNOG00000016145	Strn4	1:78732997-78765692	53.237659	52.632854	62.765411	66.660828	49.856647	57.956776	58.717987	54.727055	68.821487	45.215038	52.906330	54.366451
ENSRNOG00000016055	Fkrp	1:78733508-78739107	18.866480	14.112563	18.088118	15.319730	15.393062	16.912161	18.278296	12.995873	15.902712	12.604602	13.310503	14.179998
ENSRNOG00000016434	Prkd2	1:78767911-78851828	71.042549	73.029236	90.631096	73.960350	54.335682	65.649559	70.257622	46.765045	84.609291	52.651711	38.327675	64.551765
ENSRNOG00000052256	Dact3	1:78800754-78812483	48.150349	48.561710	63.155968	61.000294	52.419857	54.036205	53.303707	46.315266	72.277069	41.954731	48.052448	58.504463
ENSRNOG00000016701	Gng8	1:78818404-78822224	3.347044	3.168765	3.053204	1.938869	3.720178	3.876475	3.242074	1.407909	2.343682	2.552197	4.160400	2.646034
ENSRNOG00000016756	Ptgir	1:78833157-78837623	0.099716	0.062299	0.097808	0.092333	0.159146	0.117434	0.045726	0.037542	0.071859	0.106637	0.112313	0.038487
ENSRNOG00000016770	Calm3	1:78843080-78851719	519.547180	563.311401	680.252319	694.603210	476.961182	529.413696	586.686218	597.543030	733.843140	452.465668	552.195129	622.013489
ENSRNOG00000016863	Pnma8b	1:78876205-78878779	160.365570	100.216339	144.469620	113.896034	136.455002	136.701767	156.902130	112.766647	124.007988	142.453033	106.511353	96.139511
XLOC_020125	XLOC_020125	1:78922818-78927614	2.574663	1.703172	0.888096	1.841075	1.702818	1.916460	2.270900	1.955688	2.310045	1.845337	1.541321	1.737557
XLOC_004823	XLOC_004823	1:78922905-78927639	12.465337	12.909046	14.103022	31.538927	11.116310	12.579202	10.090620	12.375886	15.563416	10.058698	10.788842	10.780187
XLOC_020197	XLOC_020197	1:80007958-80008596	0.000000	0.000000	0.000000	0.000000	0.071097	0.321553	0.067398	0.000000	0.000000	0.065068	0.000000	0.080654
XLOC_020198	XLOC_020198	1:80016954-80026689	0.000000	0.203745	0.185372	0.0	0.400643	0.192944	0.204808	0.021648	0.074879	0.022657	0.351330	0.000000
ENSRNOG00000060146	Six5	1:80000165-80003232	0.908867	0.606991	0.600604	0.539556	1.177892	0.785341	0.619160	0.326978	0.612107	1.098794	0.781141	0.665005
ENSRNOG00000015413	Qpctl	1:80047504-80056574	10.418110	8.964861	10.944885	10.391726	9.361266	10.635316	11.383062	8.781312	9.888997	9.943231	8.998509	9.365362
ENSRNOG00000013847	Nova2	1:79831534-79865807	32.157341	24.951426	33.888763	34.796574	31.592422	35.528595	31.048374	33.761852	33.188389	28.688057	27.113422	29.883726
ENSRNOG00000038088	Nanos2	1:79894450-79895910	0.020458	0.042289	0.039541	0.048354	0.081388	0.058059	0.0	0.088324	0.057883	0.0	0.000000	0.0
ENSRNOG00000038087	AC110846.1	1:79898419-79914183	6.651362	3.711240	5.154504	3.459242	4.225815	4.672019	4.437575	3.446450	4.065757	4.104324	3.635773	4.184137
ENSRNOG00000014132	Mypop	1:79898551-79911513	7.527235	5.859390	7.808921	6.749693	7.161758	7.312374	7.007872	5.889715	7.643575	5.857057	6.756941	7.057559
ENSRNOG00000014252	Irf2bp1	1:79911516-79914217	19.600580	11.609183	16.769104	13.504169	18.918753	15.814729	17.566954	12.074546	15.825729	18.002007	11.223910	12.927700
ENSRNOG00000014256	Foxa3	1:79920439-79999353	2.270147	1.662080	2.510334	1.562880	1.697381	1.535401	1.896395	1.501796	1.712183	1.714105	1.704691	1.330384
ENSRNOG00000014353	Sympk	1:79931156-79959461	23.575460	16.848759	22.722054	19.501581	21.969475	20.912462	22.973778	16.489584	21.130762	17.415823	15.454910	16.029659
ENSRNOG00000061526	Rsph6a	1:79959591-79979205	0.741654	0.620855	0.437880	0.571437	0.520306	0.512038	0.487615	0.492433	0.539890	0.504448	0.342950	0.593905
ENSRNOG00000014984	Dmwd	1:79981355-79987562	30.660580	25.557768	34.000809	31.609541	30.048365	30.925194	33.531178	27.275902	30.117506	29.605536	25.851353	26.768759
ENSRNOG00000015085	Dmpk	1:79989019-79999364	3.658491	4.387931	3.708963	4.528596	5.489018	4.067479	2.935038	3.623957	4.109107	4.930403	4.684158	4.334439
ENSRNOG00000047435	AC120692.1	1:79991920-79991984	0.573250	0.627351	0.461691	1.278860	1.234901	0.829966	0.174389	1.801318	0.763164	1.817652	1.827767	0.621782
ENSRNOG00000015844	Snrpd2	1:80056755-80059996	29.186140	21.702406	29.919678	22.008640	23.078478	21.909256	27.327871	21.463125	24.533354	25.749430	21.919134	19.509577
ENSRNOG00000030127	Eml2	1:80087684-80119012	46.542820	32.086060	41.105072	29.053415	34.250099	41.463333	41.430794	27.047546	34.172081	27.490494	30.258814	27.651239
ENSRNOG00000035565	Mir330	1:80092681-80092777	0.298887	0.347140	0.000000	0.011227	0.323015	0.020112	0.015666	0.217650	0.020644	0.146550	0.008399	0.018296
ENSRNOG00000025890	Opa3	1:80141630-80160145	15.480710	12.224705	15.174365	14.693867	14.945445	14.776116	15.625909	12.772654	15.887483	14.276503	11.936135	14.370779
ENSRNOG00000056238	RF00003	1:80155777-80155931	0.136910	0.529487	0.472276	0.492238	0.620720	0.696101	0.000000	0.198056	0.656042	0.050404	0.169940	0.311329
ENSRNOG00000016367	Vasp	1:80170619-80185882	6.076507	3.917892	4.638718	3.625077	4.830203	4.184771	3.797354	2.320801	3.186056	6.493974	2.764695	3.263849
ENSRNOG00000016603	Rtn2	1:80195532-80208448	31.904535	24.608597	33.077866	26.234514	30.344801	31.045399	33.258232	21.526340	29.864614	26.521227	25.811546	27.674696
XLOC_020221	XLOC_020221	1:80224277-80238439	0.280804	0.000000	0.000000	0.000000	0.183325	0.120457	0.053916	0.251026	0.061664	0.048360	0.117885	0.000000
XLOC_004917	XLOC_004917	1:80231312-80235970	0.116053	0.398966	0.131247	0.203967	0.157590	0.377790	0.158388	0.273360	0.241414	0.253072	0.553415	0.129598
XLOC_004918	XLOC_004918	1:80236518-80245742	0.095049	0.235765	0.134490	0.069502	0.125030	0.216308	0.046907	0.157201	0.176642	0.095162	0.191942	0.030363
ENSRNOG00000046667	Fosb	1:80214494-80221710	9.596903	6.860371	16.418268	2.463889	6.808939	14.112363	8.134370	2.263125	3.395211	6.996411	5.895843	2.115398
ENSRNOG00000025350	Ppp1r13l	1:80279706-80290408	1.213761	1.161120	1.180971	0.995724	1.029098	1.075847	0.984104	0.692171	1.363313	1.264526	1.120352	1.064931
ENSRNOG00000017839	Ercc1	1:80256973-80268198	14.337082	11.780213	14.165535	13.419179	11.798170	11.710360	13.139646	11.523738	12.961776	12.527610	10.684803	12.144766
ENSRNOG00000016825	Cd3eap	1:80267725-80271001	1.614331	1.241849	1.581771	1.464619	1.646999	1.106033	1.425298	1.280482	1.262992	1.342114	1.376539	1.362188
ENSRNOG00000016837	Ckm	1:80321585-80331841	0.000000	0.000000	0.000000	0.000000	0.000000	0.000000	0.000000	0.000000	0.000000	0.000000	0.000000	0.000000
ENSRNOG00000029745	AABR07002677.1	1:80330049-80331626	0.000000	0.000000	0.000000	0.144951	0.113044	0.000000	0.115218	0.031940	0.000000	0.236479	0.056952	0.096181
ENSRNOG00000017753	Ercc2	1:80293566-80307344	3.858703	3.764611	4.616482	4.877415	4.140436	4.549551	3.705750	4.122594	4.018038	3.778126	3.477684	4.081315
ENSRNOG00000036303	Mir343	1:80298686-80298778	0.425001	0.646571	0.395095	1.191915	1.100357	0.721700	0.376291	0.683640	0.934631	1.322617	0.808515	0.707421
ENSRNOG00000018101	Klc3	1:80306102-80315533	0.348174	0.194003	0.252459	0.143818	0.291365	0.209666	0.310982	0.274826	0.213125	0.318234	0.502773	0.238985
ENSRNOG00000060041	AABR07002677.2	1:80372505-80382703	0.443532	0.222574	0.329370	0.189421	0.165419	0.406687	0.288315	0.349406	0.168482	0.361639	0.235601	0.309524
ENSRNOG00000017448	Exoc3l2	1:80383050-80404290	0.643962	0.454651	0.647028	0.310803	0.463893	0.502789	0.447894	0.319108	0.606047	0.375084	0.440084	0.677952
ENSRNOG00000017463	Bloc1s3	1:80415686-80416273	8.054527	4.646999	6.458397	5.616977	4.363651	6.526991	7.339987	4.928471	5.669711	5.717326	4.511351	5.896884
ENSRNOG00000017468	Trappc6a	1:80417310-80424445	3.291989	1.779587	3.024202	2.573671	1.918415	2.734591	3.558131	1.970449	2.126354	2.342949	2.294138	2.155762
ENSRNOG00000017069	Mark4	1:80335526-80367328	26.155704	21.684509	29.394934	27.336397	21.227964	26.153095	25.091715	25.418655	26.098667	18.963005	22.817720	22.555075
ENSRNOG00000043378	Nkpd1	1:80426918-80432875	0.971589	0.874606	1.326669	0.814292	0.852134	1.190500	1.243055	0.850384	0.749253	0.612376	0.649785	0.934242
ENSRNOG00000049772	Gemin7	1:80473966-80483487	3.079436	2.191736	3.111559	2.200164	3.020100	2.988959	3.445679	2.479396	3.253641	3.031472	2.079785	2.684633
ENSRNOG00000049605	Zfp296	1:80487938-80491039	0.140926	0.148021	0.111422	0.258144	0.047912	0.089182	0.104801	0.023919	0.212037	0.131631	0.150752	0.055251
ENSRNOG00000017692	Ppp1r37	1:80439718-80471527	27.418226	29.011707	31.338531	31.779490	28.473223	27.660301	29.815264	27.396280	36.821308	25.916103	27.065489	28.709387
ENSRNOG00000033235	Relb	1:80517411-80545271	1.449186	1.094183	1.275727	1.306620	1.420182	1.300261	1.244712	0.993030	0.985757	2.323274	1.326046	1.532625
ENSRNOG00000046000	Clasrp	1:80491480-80515694	5.116015	8.174522	5.558148	7.001620	6.365212	6.960753	4.589805	6.910256	6.508148	7.477051	10.231462	6.206028
ENSRNOG00000018255	Clptm1	1:80549043-80580662	70.650009	48.662189	65.746902	58.794384	60.683701	60.814159	69.712898	47.481983	62.405903	57.183754	46.756977	48.493881
ENSRNOG00000031391	Ceacam16	1:80773819-80783898	0.084453	0.273408	0.159340	0.025774	0.040996	0.232678	0.065971	0.012286	0.0	0.031244	0.146960	0.126426
ENSRNOG00000054552	AABR07002680.2	1:80773904-80780167	0.000000	0.158741	0.081298	0.092587	0.000000	0.402081	0.000000	0.000000	0.0	0.000000	0.000000	0.029807
ENSRNOG00000047795	AABR07002680.1	1:80778692-80779984	0.000000	0.155059	0.000000	0.000000	0.112246	0.072487	0.000000	0.059355	0.0	0.313804	0.218329	0.019435
ENSRNOG00000043416	Bcl3	1:80730499-80744831	0.215186	0.101225	0.222969	0.310167	0.303365	0.163725	0.082058	0.014209	0.076158	0.237276	0.061395	0.217491
ENSRNOG00000029399	Bcam	1:80674444-80689171	5.836135	6.369285	5.397882	4.945943	4.879296	4.932745	4.499266	2.952495	4.737854	4.777528	5.326994	5.044641
ENSRNOG00000019202	PVR	1:80820050-80835701	1.767862	1.788154	1.886143	1.122788	1.324286	2.377150	0.869893	0.846953	1.213806	2.003766	1.102215	1.367207
ENSRNOG00000056832	AABR07002682.1	1:80944126-80951319	0.407698	0.229438	0.173115	0.347800	0.801538	0.289521	0.285124	0.386680	0.853320	0.306502	0.505566	0.182940
ENSRNOG00000029022	Zfp112	1:80953275-80958908	2.635225	1.780655	2.024292	1.733632	2.099209	2.314857	2.590368	1.444329	2.538176	2.039048	1.938256	1.709996
ENSRNOG00000018402	Apoc2	1:80589023-80594136	0.000000	0.0	0.000000	0.0	0.088662	0.000000	0.000000	0.000000	0.0	0.0	0.0	0.029450
ENSRNOG00000018405	Apoc4	1:80595326-80599572	0.440005	0.168029	0.443070	0.000000	1.098901	0.461716	0.334795	0.259334	0.176497	1.372042	0.439866	0.079076
ENSRNOG00000018426	NEWGENE_2134	1:80595326-80612314	7.196340	2.196169	4.031797	1.902022	12.650180	3.565500	9.076130	2.132102	4.262603	19.263050	3.374081	3.069195
ENSRNOG00000018454	Apoe	1:80612895-80617057	884.691101	780.201416	813.132690	659.217224	921.053406	791.480469	844.005859	504.099487	814.215576	988.105103	767.644836	757.944641
ENSRNOG00000018556	Tomm40	1:80618154-80630038	39.607525	29.285408	36.959763	34.066540	32.279274	29.124445	35.354889	30.772966	34.259068	36.386581	28.075720	25.943050
ENSRNOG00000018730	Nectin2	1:80631450-80666585	5.663671	3.038145	3.970047	4.079065	5.188921	4.356454	4.551236	2.120203	2.910722	4.950383	2.712799	3.934269
ENSRNOG00000019260	Ceacam20	1:80880856-80912082	0.000000	0.0	0.000000	0.0	0.000000	0.000000	0.0	0.000000	0.000000	0.0	0.000000	0.0
ENSRNOG00000029336	Zfp180	1:80920747-80940040	35.551712	28.084654	36.107151	31.550644	42.496536	28.439360	39.333122	26.516335	37.811310	35.801167	31.622784	31.511320
XLOC_004973	XLOC_004973	1:80966104-80969478	0.692969	0.812897	0.839605	0.757913	1.387475	0.812415	1.151734	0.560328	1.022092	0.894414	1.313376	0.876692
XLOC_020275	XLOC_020275	1:80966901-80969099	0.568140	0.000077	0.017875	0.069322	0.068885	0.110112	0.034044	0.025330	0.225446	0.000000	0.064106	0.289747
ENSRNOG00000019427	Tescl	1:81192869-81193729	0.104142	0.0	0.0	0.0	0.0	0.013267	0.146281	0.0	0.0	0.0	0.047624	0.0
ENSRNOG00000019432	Lypd5	1:81208212-81213937	0.525500	0.447104	1.196419	1.063583	1.307701	0.517657	0.575284	0.745459	0.655476	1.527009	0.776462	0.493513
ENSRNOG00000019440	Kcnn4	1:81230612-81245996	0.200195	0.102563	0.093424	0.075111	0.388471	0.222816	0.138206	0.047262	0.068730	0.898840	0.075572	0.059711
ENSRNOG00000019416	Zfp61	1:81122790-81152384	2.031934	2.009371	3.260356	3.681718	4.122974	2.239453	1.952288	2.616094	3.657672	3.388566	3.839062	2.930744
ENSRNOG00000055608	LOC102548695	1:81159107-81163689	9.624922	8.713651	10.703007	11.217517	9.156965	8.258733	10.920522	8.581620	10.638880	7.434250	8.273071	8.957727
ENSRNOG00000024257	Irgc	1:81291765-81295442	0.017520	0.162851	0.139972	0.041410	0.087417	0.089589	0.064090	0.046692	0.144800	0.057942	0.310393	0.191141
ENSRNOG00000037931	Plaur	1:81328183-81344708	0.482136	0.310297	1.470055	0.549847	0.741177	0.820486	0.449963	0.528555	0.453943	1.320134	0.308508	0.396899
ENSRNOG00000019596	Smg9	1:81260548-81282887	6.271054	8.221883	8.816776	7.582719	6.430694	7.749119	7.559133	7.404597	8.443742	6.179893	7.003720	7.451693
ENSRNOG00000024243	Cadm4	1:81365138-81370109	115.944305	105.688660	114.711006	91.188187	108.634415	101.310570	115.653412	78.015762	104.150459	95.512619	99.545731	100.523636
ENSRNOG00000050032	AABR07002689.1	1:81370324-81383550	1.344647	1.107428	0.999794	0.892462	1.155658	1.120943	1.026323	0.931659	0.960671	1.242082	0.829116	0.647533
ENSRNOG00000019802	Zfp428	1:81372650-81384389	11.649508	9.320835	9.258546	9.055993	12.455007	10.168827	11.285793	10.223076	10.024139	12.518524	9.568870	8.894566
ENSRNOG00000024065	Zfp575	1:81447987-81450094	4.276801	4.690216	5.860300	5.651066	4.936381	4.714955	6.000358	5.238044	5.087616	4.110089	5.510399	4.256980
ENSRNOG00000020057	Tex101	1:81529781-81534140	0.000000	0.0	0.0	0.033136	0.0	0.0	0.0	0.0	0.0	0.0	0.0	0.000000
ENSRNOG00000046500	Irgq	1:81395841-81399672	21.683994	19.303297	24.283638	24.113779	20.698790	21.340832	23.934177	22.421429	25.980623	20.217445	17.828611	19.989855
ENSRNOG00000019862	Pinlyp	1:81406576-81412251	0.000000	0.0	0.000000	0.036604	0.068839	0.0	0.063953	0.0	0.088977	0.029267	0.0	0.000000
ENSRNOG00000019915	Xrcc1	1:81413353-81441678	11.796085	10.270320	13.545741	9.868461	10.916675	11.729381	11.940339	10.250145	11.279119	12.079096	12.811223	7.675120
ENSRNOG00000019999	Lypd3	1:81499821-81504318	0.088506	0.172133	0.208947	0.083902	0.108480	0.060444	0.129617	0.084521	0.036684	0.184705	0.048377	0.059016
ENSRNOG00000048783	LOC100909700	1:81609433-81627710	0.000000	0.000000	0.000000	0.000000	0.000000	0.000000	0.000000	0.000000	0.000000	0.000000	0.0	0.0
ENSRNOG00000055259	Phldb3	1:81473836-81492936	0.116993	0.231427	0.187693	0.103149	0.203369	0.223563	0.085653	0.052711	0.189035	0.200168	0.125398	0.000000
ENSRNOG00000019982	Ethe1	1:81456984-81472097	6.253051	5.837798	5.989038	5.055743	5.379016	4.572433	6.429066	5.035207	6.095582	5.764943	5.251871	4.490898
ENSRNOG00000050105	Ceacam4	1:81643816-81650094	0.379881	0.404542	0.363916	0.388861	0.193629	0.149909	0.137417	0.301252	0.195299	0.175804	0.294850	0.242400
ENSRNOG00000037897	Rps19	1:81750890-81756676	80.919991	44.655975	114.598412	45.734863	66.496590	58.495346	50.030819	6.111467	31.247156	80.133148	7.942148	7.490751
XLOC_020349	XLOC_020349	1:82034111-82035168	0.000000	0.092216	0.023290	0.349946	0.276734	0.124668	0.031330	0.096461	0.232431	0.132396	0.240982	0.065926
XLOC_005030	XLOC_005030	1:82022379-82026309	0.256051	0.122194	0.106186	0.080753	0.273532	0.082065	0.327461	0.036562	0.115196	0.071869	0.090980	0.087582
ENSRNOG00000046112	Dedd2	1:82064752-82089052	6.097538	7.555449	5.556293	8.733285	10.337029	8.215034	8.423965	6.469408	9.932708	6.194676	6.479107	7.046253
ENSRNOG00000057603	RF00026	1:82072646-82089018	1.055195	1.499303	2.210831	1.057905	1.114115	0.895100	0.932471	1.254793	1.728201	1.062020	1.109557	1.203836
ENSRNOG00000020310	Grik5	1:81885521-81946714	50.970661	48.577415	59.098770	63.360428	51.000519	57.597752	54.250973	55.378998	55.610989	49.214397	51.605957	54.596340
ENSRNOG00000047526	Zfp526	1:82089922-82097526	3.619102	2.803616	3.566690	2.747371	3.447913	3.415409	3.456576	2.497082	3.635830	3.081350	3.455814	3.428937
ENSRNOG00000020417	Gsk3a	1:82097247-82108203	85.558479	82.229973	98.902473	91.684845	80.245102	88.651588	96.703079	75.233604	100.917168	70.024727	73.938843	79.731834
ENSRNOG00000020426	Erf	1:82112449-82120902	12.497460	8.428765	13.587862	9.744606	10.940751	13.378246	10.025925	9.032254	8.675424	9.836059	10.053897	8.433449
XLOC_005022	XLOC_005022	1:81771487-81775120	0.000000	0.313520	0.000000	0.501718	0.248988	0.000000	0.000000	0.133942	0.442678	0.718178	0.825067	0.000000
ENSRNOG00000020130	Arhgef1	1:81779380-81797236	6.284888	6.342052	6.391850	6.438663	7.433303	6.518806	5.110967	6.250047	6.054189	8.278543	7.667048	6.409786
ENSRNOG00000020233	Rabac1	1:81843649-81846804	105.217430	74.908279	105.043808	85.511887	81.414627	79.877815	106.639076	78.593697	88.444283	84.642433	67.615143	64.013870
ENSRNOG00000061682	AABR07071886.1	1:81843954-81844017	0.211712	0.102974	0.259572	0.207888	0.474000	0.148441	0.104956	0.156523	0.088628	0.391275	0.806176	0.067291
ENSRNOG00000020263	Atp1a3	1:81852429-81881549	664.459167	457.279816	554.680176	474.943329	553.663635	517.148987	568.019409	458.257141	500.557495	643.720886	395.832550	407.011627
ENSRNOG00000059450	AC114696.1	1:81862880-81862943	0.016129	0.416724	0.005024	0.737728	0.356365	0.113098	0.000000	0.664800	0.233655	1.163528	0.337321	0.119915
ENSRNOG00000043154	Prr19	1:82169620-82172636	0.000000	0.0	0.024906	0.0	0.025728	0.0	0.000000	0.0	0.000000	0.038862	0.0	0.0
ENSRNOG00000020481	Pafah1b3	1:82163595-82166363	5.017268	2.118818	3.227544	1.510746	4.688512	3.471573	4.440705	2.640338	2.336883	4.684742	2.559719	1.610483
ENSRNOG00000056118	Cic	1:82151669-82163005	27.527674	26.101440	30.328251	28.307226	32.241055	27.835217	29.065508	25.257925	29.428520	29.286493	27.740440	28.500862
ENSRNOG00000020489	Tmem145	1:82174451-82184068	7.678045	11.533431	9.268401	10.681134	7.553941	6.968364	8.000570	9.474977	11.197443	8.544391	11.476336	8.057305
ENSRNOG00000020606	B3gnt8	1:82419947-82422846	0.106681	0.058932	0.041700	0.066401	0.036416	0.037262	0.039677	0.060366	0.055532	0.079522	0.044959	0.011501
ENSRNOG00000020530	Cnfn	1:82184706-82236179	2.752114	3.283151	3.798773	3.515723	2.536694	2.907517	2.185116	1.835166	2.204716	1.986231	1.986189	1.850549
ENSRNOG00000052687	Megf8	1:82185034-82234045	19.735674	25.689198	29.801968	33.139721	23.896843	25.458689	19.824715	17.046068	18.998833	16.306971	18.196430	17.220377
ENSRNOG00000020538	AC121639.1	1:82245198-82408162	1.199568	2.500141	1.987492	2.900058	1.420787	2.575092	2.657344	1.629821	1.953226	1.637483	4.184799	3.980092
ENSRNOG00000020596	Dmac2	1:82245237-82419428	13.073691	12.514705	15.170383	15.487858	12.181581	13.240149	13.311992	10.522002	11.303131	9.743737	10.897470	11.378005
ENSRNOG00000020546	Lipe	1:82245254-82266727	3.285402	3.338082	2.976211	1.971787	3.298242	3.092518	3.146909	1.941708	2.527400	3.084603	3.446351	2.442180
ENSRNOG00000037814	Cxcl17	1:82267381-82279145	0.312994	0.234174	0.227913	0.083854	0.030778	0.374054	0.035142	0.126879	0.210714	0.109166	0.136383	0.011761
ENSRNOG00000020578	Ceacam1	1:82327955-82344345	0.373761	0.185459	0.254077	0.139150	0.468661	0.319571	0.233435	0.126167	0.103175	0.575315	0.477004	0.310338
XLOC_005060	XLOC_005060	1:82346468-82348614	0.188361	0.264049	0.131089	0.340864	0.228153	0.123367	0.122996	0.353939	0.084173	0.416935	0.239129	0.176035
XLOC_020381	XLOC_020381	1:82380811-82404633	0.045845	0.272116	0.161950	0.215669	0.021635	0.000000	0.094957	0.077303	0.052426	0.000000	0.043533	0.031723
ENSRNOG00000037798	Erich4	1:82407899-82419106	1.713382	1.791865	1.672081	1.315104	1.069497	1.461131	1.354452	1.057403	1.480273	1.187664	1.088719	0.752648
ENSRNOG00000020607	Bckdha	1:82423277-82452281	17.942541	12.678732	15.061646	9.427437	14.136346	13.987956	15.177374	9.642717	12.467750	14.064028	11.574484	10.392482
ENSRNOG00000020652	Tgfb1	1:82480195-82497199	6.208653	4.536617	5.211014	3.784912	5.223692	5.224471	5.218344	2.861707	4.308099	5.526009	3.849530	3.691883
ENSRNOG00000020635	Exosc5	1:82452469-82461606	11.995522	6.783542	11.005214	8.271983	9.723828	10.992584	10.900159	7.893631	7.799820	8.787889	7.648349	7.915263
ENSRNOG00000021302	Tmem91	1:82463191-82479709	6.591300	4.001426	3.971042	3.056644	6.023020	4.531944	6.570703	3.325394	3.455930	4.078259	3.633497	3.156296
ENSRNOG00000028753	B9d2	1:82473737-82479900	10.566176	7.173985	9.867898	7.667698	9.334407	9.058639	10.235528	6.891346	6.999233	9.836460	8.155124	6.483857
ENSRNOG00000020675	Ccdc97	1:82503571-82511327	13.102240	10.036498	13.226679	10.982202	12.700920	11.602421	12.898575	10.114955	12.576267	11.158761	10.309980	10.805515
ENSRNOG00000020683	Hnrnpul1	1:82512745-82546937	34.092045	23.135233	33.435719	23.468828	31.277258	32.913494	33.285995	21.702728	25.594528	31.090351	23.554604	21.802658
XLOC_005079	XLOC_005079	1:82584624-82585482	0.190429	0.216413	0.272032	0.205004	0.335909	0.181833	0.381899	0.143067	0.190102	0.220878	0.135505	0.264311
ENSRNOG00000022669	Cd177	1:82964683-82987253	0.000000	0.000000	0.000000	0.000000	0.000000	0.031266	0.030516	0.000000	0.000000	0.000000	0.0	0.0
ENSRNOG00000020743	Cyp2s1	1:82595211-82610350	1.529789	0.681696	0.835837	0.846786	1.073164	0.780879	1.038080	0.506446	0.592738	0.678519	0.589536	0.501783
ENSRNOG00000046222	LOC103689942	1:83003841-83010171	0.313334	0.376328	0.338029	0.313522	0.179856	0.139245	0.129221	0.279822	0.181407	0.163299	0.273876	0.000000
ENSRNOG00000033164	Cyp2b3	1:83163079-83248370	0.000000	0.000000	0.000000	0.447872	0.066381	0.000000	0.0	0.672239	0.098293	0.091174	0.279998	0.264881
ENSRNOG00000050758	AC142154.1	1:83435563-83437989	0.825131	0.506958	0.849856	0.707824	0.580879	0.873027	0.624102	0.581490	0.659235	0.558332	0.718801	0.563754
XLOC_020423	XLOC_020423	1:83643002-83647859	0.000000	0.000000	0.088577	0.0	0.106140	0.0	0.000000	0.000000	0.000000	0.000000	0.381522	0.000000
ENSRNOG00000020716	Axl	1:82549420-82580761	12.320947	8.497357	9.781624	8.704387	12.881283	11.093944	9.973308	5.925347	11.560514	13.143172	11.398909	10.225703
ENSRNOG00000055096	AABR07002768.1	1:83816569-83819689	2.475880	2.271686	2.351464	2.215180	2.039506	2.143048	2.610744	2.733311	2.570617	2.258427	2.582486	1.930345
ENSRNOG00000001499	Mia	1:83991578-83993270	0.187397	0.300699	0.140279	0.124559	2.705338	0.960540	0.107011	0.300242	0.530307	7.245333	0.301366	0.224726
ENSRNOG00000028891	Cyp2t1	1:83965608-83969559	1.769173	0.944610	1.132922	0.658634	1.197092	1.111802	1.674825	0.689156	1.559452	1.651486	1.587471	0.654138
ENSRNOG00000020947	Egln2	1:83969457-83977236	29.892185	22.738029	29.614433	23.948776	25.792013	26.432291	29.389467	19.424925	26.039152	21.605875	24.302515	21.481695
ENSRNOG00000001500	Rab4b	1:83979298-83990588	24.224337	22.987095	28.763908	21.855671	20.319719	22.536879	24.784061	20.459347	24.751654	20.640638	20.781601	18.876091
ENSRNOG00000001501	Snrpa	1:83999671-84008293	6.097205	3.814094	5.079779	5.168054	6.808362	5.206365	5.958499	5.761925	5.074461	6.826440	3.926859	5.197242
ENSRNOG00000037715	RGD1560854	1:83999758-84042549	1.501781	1.852050	1.803678	1.558838	1.676177	1.710096	1.998710	1.639502	1.912237	1.618540	1.632988	1.410823
ENSRNOG00000041608	AC123095.1	1:84017135-84017253	0.041823	0.049804	0.043778	0.044430	0.031757	0.048992	0.052663	0.046595	0.061112	0.034896	0.070309	0.034886
ENSRNOG00000013945	Itpkc	1:84018859-84040433	3.571657	3.197239	4.172752	3.125084	3.596211	3.234757	3.810546	2.440972	3.373529	2.954626	3.001656	2.459296
ENSRNOG00000020848	Coq8b	1:84044551-84067066	8.281499	9.689290	9.901999	10.672078	8.498852	9.493990	9.225098	9.536089	10.787441	8.186414	9.901256	8.411453
ENSRNOG00000020867	Numbl	1:84067938-84091671	25.187181	26.275434	30.926991	31.332626	23.855080	25.780764	28.803810	28.577164	36.338715	21.746939	28.509552	26.134762
ENSRNOG00000037690	Sertad3	1:84280945-84284663	2.160296	0.670978	1.439891	1.066040	1.252246	1.451081	1.267784	1.179367	0.934063	1.118305	1.066893	1.215692
ENSRNOG00000018369	Prx	1:84304228-84324560	0.522139	0.390750	0.394191	0.338091	0.482878	0.507517	0.316871	0.257739	0.421090	0.281223	0.447964	0.540948
ENSRNOG00000020871	Ltbp4	1:84118046-84150084	7.710138	7.817232	8.675399	9.540315	7.472147	8.712420	7.289451	7.437148	9.267675	8.667960	8.676254	7.693305
ENSRNOG00000020882	Shkbp1	1:84154703-84168074	2.070646	2.179242	2.018302	1.941168	2.029607	1.720465	1.708134	1.626721	1.611569	1.934494	2.388329	2.068427
ENSRNOG00000055371	Sptbn4	1:84168495-84254645	18.105453	20.807768	19.561834	21.053764	18.986935	18.362226	20.611149	19.968306	20.544865	18.255919	20.940004	19.965044
ENSRNOG00000024410	Blvrb	1:84246268-84278565	19.717764	12.833028	16.675550	14.744965	13.538877	14.569239	16.276810	16.056662	18.933178	14.446836	14.318411	15.581051
ENSRNOG00000020835	Hipk4	1:84328114-84338483	0.931896	1.322747	1.682336	1.491301	0.932597	0.892819	0.871183	0.899171	1.539843	0.700298	1.293526	1.413088
ENSRNOG00000018390	Pld3	1:84339261-84353725	110.465965	104.773575	142.941055	130.959122	85.942543	103.547173	126.562538	120.860184	136.408890	76.472679	95.201126	100.470940
ENSRNOG00000018408	RGD1307554	1:84361736-84386751	8.508876	6.799315	8.368683	7.109259	7.315291	8.232881	7.648988	6.183348	7.725554	7.493915	6.468498	6.561256
ENSRNOG00000018677	Akt2	1:84411726-84450162	15.606756	21.267563	20.573084	22.794199	19.451435	19.242163	19.096085	18.028803	19.687769	19.765997	17.809082	22.437416
XLOC_020480	XLOC_020480	1:84454500-84461532	0.260163	0.000000	0.000000	0.0	0.000000	0.000000	0.397562	0.000000	0.070978	0.000000	0.000000	0.179072
ENSRNOG00000018850	Ttc9b	1:84470829-84491698	68.217995	73.568176	88.552185	91.388718	50.520023	73.456993	76.373856	70.761848	84.619499	51.728065	59.026623	71.858315
ENSRNOG00000023521	Map3k10	1:84473071-84491466	47.288277	45.653446	56.181946	53.030106	46.863796	50.624294	52.082390	45.523537	57.709438	38.083256	49.386398	51.397209
ENSRNOG00000046338	LOC100909824	1:84526911-84642305	5.814246	4.086124	5.607841	5.445708	6.676179	6.027604	5.441429	4.415754	5.265915	5.299335	4.122742	4.314404
ENSRNOG00000055158	RF00026	1:84529079-84547999	0.239145	0.137777	0.172890	0.123397	0.059631	0.166246	0.116905	0.407385	0.100580	0.195888	0.444445	0.111467
XLOC_020495	XLOC_020495	1:84561659-84566086	0.000000	0.072594	0.000000	0.054849	0.406414	0.075513	0.063561	0.000000	0.048042	0.088294	0.131613	0.000000
ENSRNOG00000045741	AABR07071891.3	1:84576130-84695052	2.195951	2.335866	2.013349	2.763699	3.358804	2.601475	1.415414	2.657653	1.726604	2.512723	2.260366	1.967058
ENSRNOG00000018885	AABR07071891.1	1:84584596-84598186	4.721979	2.879892	4.080755	3.641677	4.368288	4.160664	4.347900	3.352321	4.060082	3.891158	3.254869	3.402895
ENSRNOG00000050995	AABR07002774.4	1:84652632-84653384	2.782345	2.213673	3.094859	2.863123	3.263161	2.851648	3.182013	2.484585	2.919423	2.662254	2.192446	3.034801
XLOC_020500	XLOC_020500	1:84669312-84678841	0.015096	0.033887	0.000000	0.005272	0.006016	0.129336	0.000000	0.150256	0.008685	0.108590	0.332132	0.007526
XLOC_020516	XLOC_020516	1:84675753-84678081	0.010732	0.000000	0.000000	0.000000	0.018128	0.000000	0.000000	0.000000	0.014310	0.207790	0.000000	0.000000
ENSRNOG00000018928	AABR07002774.1	1:84675753-84739689	2.361375	2.908802	2.683405	2.650654	2.872137	3.089831	1.738213	3.316166	2.321903	3.654391	3.201624	2.815433
ENSRNOG00000029805	AABR07002774.2	1:84685931-84698793	3.131701	3.447700	3.185405	3.163016	3.854922	3.800601	2.855732	3.657794	2.983325	4.003235	2.963145	3.197479
ENSRNOG00000048489	AABR07002775.1	1:84758233-84760071	5.700347	3.642447	4.933453	4.408091	4.973237	5.137965	4.615782	4.040796	4.824506	4.509051	3.914915	3.621773
ENSRNOG00000058145	RF00100	1:84797290-84797629	0.000000	0.000000	0.000000	0.000000	0.000000	0.000000	0.000000	0.000000	0.000000	0.000000	0.000000	0.000000
ENSRNOG00000018936	Zfp780b-ps1	1:84879973-84894805	5.703928	4.213695	4.434592	4.438505	6.200912	5.529531	5.369216	4.416169	4.692348	5.608978	4.450237	4.797223
XLOC_005212	XLOC_005212	1:84899308-84904031	0.422235	0.521495	0.435638	0.311584	0.551270	0.305170	0.362948	0.215746	0.360091	0.489067	0.523835	0.432905
ENSRNOG00000053366	AABR07002784.1	1:84937034-84950210	5.421569	3.853992	4.464417	4.374851	4.601094	5.214604	4.978052	4.307116	3.837690	4.398537	4.441422	4.171686
ENSRNOG00000056883	RF00066	1:84937060-84959197	0.345742	0.485370	0.110421	0.092567	0.050242	0.092631	0.207402	0.075424	0.106319	0.119388	0.067216	0.079934
ENSRNOG00000060634	AABR07002784.2	1:84953311-84959283	0.570442	0.593924	0.395042	0.298784	0.638083	0.255972	0.274466	0.633895	0.638176	0.376149	0.409434	0.275331
ENSRNOG00000059438	RF00004	1:84992289-84992468	0.131732	0.0	0.0	0.0	0.0	0.0	0.0	0.0	0.0	0.0	0.0	0.0
ENSRNOG00000042899	Fcgbpl1	1:85058548-85096346	0.003924	0.0	0.008444	0.000000	0.008420	0.000000	0.012389	0.000000	0.008125	0.003509	0.000000	0.000000
ENSRNOG00000019129	Fcgbp	1:85003280-85046840	0.878195	0.210175	0.570213	0.287609	0.651187	0.706341	0.642257	0.281769	0.300404	0.345565	0.402286	0.289017
ENSRNOG00000018994	Psmc4	1:84978206-84986581	40.526989	31.781755	38.556126	30.822660	36.032074	32.973206	39.521755	27.583115	35.442482	35.015495	25.760445	23.438503
ENSRNOG00000047901	Acp7	1:85143789-85153210	0.000000	0.025808	0.079152	0.0	0.000000	0.0	0.022973	0.0	0.000000	0.0	0.0	0.0
ENSRNOG00000054506	Nccrp1	1:85213652-85217258	0.264375	0.127009	0.074304	0.024684	0.058027	0.047421	0.022003	0.141896	0.040426	0.031902	0.073827	0.126322
ENSRNOG00000019879	Sycn	1:85218803-85220237	0.211227	0.0	0.054157	0.062407	0.117366	0.177840	0.0	0.0	0.081994	0.0	0.0	0.0
ENSRNOG00000019229	Fbl	1:85103519-85112619	14.940203	8.227777	11.156288	7.285562	10.603744	10.172446	13.383451	6.325895	9.793410	11.264669	7.891210	7.270215
ENSRNOG00000019254	Dyrk1b	1:85112247-85120839	15.950393	13.967731	15.031898	15.871701	16.126816	14.987510	16.474504	13.936495	15.610719	15.758368	16.340803	16.652847
ENSRNOG00000019883	Pak4	1:85162452-85201757	3.369357	2.410400	2.723696	2.313257	3.606997	2.560439	2.838680	1.630293	1.878796	2.835040	2.602851	2.326527
ENSRNOG00000055129	AC110862.2	1:85199612-85199672	0.000817	0.000000	0.000000	0.000000	0.000000	0.061184	0.000000	0.074164	0.000000	0.000000	0.000000	0.168354
ENSRNOG00000019869	Lrfn1	1:85288289-85300825	14.997062	17.880939	21.036135	23.109098	13.109419	16.114742	18.985645	22.110357	22.704206	12.577041	16.987757	19.017609
ENSRNOG00000030266	Plekhg2	1:85386470-85399699	1.580285	1.829733	1.555771	1.836544	2.010692	1.974328	1.190374	1.110608	1.330221	2.452904	1.769132	1.571219
ENSRNOG00000019831	Samd4b	1:85324043-85362241	19.105209	18.055454	20.484098	13.404980	20.942167	19.409958	20.627098	15.657410	20.686401	13.485956	18.036999	18.939743
ENSRNOG00000019746	Paf1	1:85362268-85368031	20.871256	16.880600	20.596729	15.698005	18.145399	17.436232	20.299013	15.846443	18.318850	20.040174	14.851022	14.292523
ENSRNOG00000019702	Med29	1:85368288-85373099	18.010832	14.798388	14.511733	16.058453	15.709999	15.585185	16.935591	14.684445	12.757237	15.289019	14.457725	13.879725
ENSRNOG00000058388	Zfp36	1:85380088-85382569	2.735783	2.640846	2.893693	1.851318	3.142616	2.258716	2.592748	1.558412	2.467102	2.182760	2.799388	1.525240
ENSRNOG00000062179	AABR07002792.1	1:85428558-85430659	0.011626	0.0	0.0	0.0	0.0	0.0	0.0	0.0	0.0	0.0	0.0	0.0
ENSRNOG00000062225	AABR07002792.2	1:85433213-85433367	0.257750	0.121576	0.102338	0.0	0.0	0.0	0.004063	0.017373	0.0	0.0	0.238267	0.0
ENSRNOG00000019578	Rps16	1:85403752-85408444	130.289078	102.145302	171.524506	57.807018	149.502411	170.176727	138.758972	53.068333	111.334602	74.579849	56.475380	93.190079
ENSRNOG00000055387	RF00561	1:85407511-85407636	0.093160	0.088189	0.044402	0.134874	0.099117	0.103045	0.076450	0.074374	0.061002	0.097402	0.099004	0.055839
ENSRNOG00000019338	Dll3	1:85485289-85493685	0.248524	0.129043	0.057255	0.068855	0.053850	0.110284	0.112350	0.036738	0.011764	0.086762	0.106288	0.121653
ENSRNOG00000037638	Timm50	1:85470831-85480407	16.772415	11.588307	15.142483	14.462050	14.658620	13.516030	16.446417	10.526255	15.590258	15.202096	10.458401	9.692514
ENSRNOG00000032034	Supt5h	1:85437780-85466854	60.602379	48.517693	63.107887	51.964119	50.520370	55.330814	60.900482	44.541660	54.522644	46.987427	46.863438	42.079071
ENSRNOG00000051208	Selenov	1:85496937-85504190	0.263710	0.764364	0.250954	0.384107	0.526531	0.550196	0.353371	0.213617	0.498218	0.736384	0.674861	0.746673
ENSRNOG00000045545	Eid2b	1:85504125-85510114	2.688693	2.528703	2.464559	2.150113	2.688154	2.766057	2.804487	2.358049	2.477678	3.285290	2.029003	2.236208
XLOC_020581	XLOC_020581	1:85518568-85520801	0.253540	0.429397	0.214408	0.237798	0.214282	0.017304	0.165096	0.234876	0.243901	0.080847	0.336097	0.474992
XLOC_005287	XLOC_005287	1:86505807-86516016	0.000000	0.094638	0.000000	0.178160	0.0	0.000000	0.000000	0.330794	0.0	0.000000	0.408973	0.117974
ENSRNOG00000019942	Fbxo17	1:86914137-86919236	0.205722	0.263565	0.192739	0.223112	0.117118	0.145408	0.124803	0.260331	0.174551	0.338120	0.086082	0.105130
ENSRNOG00000055681	AABR07002848.2	1:86857077-86858467	0.000000	0.000000	0.000000	0.000000	0.000000	0.000000	0.004076	0.000000	0.000000	0.000000	0.000000	0.007045
ENSRNOG00000046971	Ccer2	1:86936527-86941000	1.505262	0.483607	0.481129	0.362644	0.825167	0.529206	1.344545	0.264226	0.336510	0.754102	0.443698	0.199627
ENSRNOG00000019949	Mrps12	1:86920656-86935708	4.096791	2.102304	3.484949	3.291675	2.827051	2.450906	4.363936	1.685917	2.901701	2.965469	2.180085	2.007307
ENSRNOG00000019962	Sars2	1:86923591-86935904	3.647157	2.889665	3.712217	2.999448	3.502219	3.284861	3.772440	2.500878	3.351869	3.224505	2.567104	2.307739
XLOC_020591	XLOC_020591	1:85677378-85848313	0.289377	0.611321	0.547577	0.244267	0.284322	0.421851	0.170861	0.451804	0.608117	0.384553	0.228012	0.405536
XLOC_005262	XLOC_005262	1:85677751-85969809	3.038652	11.526177	3.093416	14.252457	11.249607	10.016036	1.861501	28.233053	7.080442	16.578566	23.723206	18.987368
XLOC_020613	XLOC_020613	1:85713107-85714374	0.016862	0.146976	0.012783	0.137593	0.044168	0.000000	0.000000	0.175466	0.049496	0.205600	0.549261	0.092255
XLOC_005263	XLOC_005263	1:85827830-85835496	0.690288	3.605093	0.646039	3.076797	2.687172	2.545468	0.540103	4.741217	1.595753	3.231057	4.324990	2.851772
XLOC_005268	XLOC_005268	1:85892818-85940807	0.649472	3.938548	0.623054	5.525154	2.969779	2.686144	0.793485	6.533446	1.672089	3.801707	5.907850	6.866475
XLOC_005270	XLOC_005270	1:85941556-85967143	0.427723	2.791492	0.333233	2.676387	2.136998	2.043729	0.387262	5.316903	1.195627	2.863404	4.559480	3.808868
ENSRNOG00000025354	Rinl	1:86972244-86983514	0.068382	0.015587	0.072026	0.018591	0.065752	0.041205	0.081351	0.0	0.045756	0.017249	0.072204	0.019984
ENSRNOG00000020063	Nfkbib	1:86941074-86948845	7.634230	5.554975	7.253771	4.901708	6.159470	5.852664	7.637192	3.437772	6.962622	5.439054	4.282850	4.655100
ENSRNOG00000020102	Sirt2	1:86948918-86971952	113.846016	101.333374	96.743401	64.419144	92.919701	92.762169	108.892227	54.196350	77.391731	78.364594	91.412781	96.024033
ENSRNOG00000020380	Lgals7	1:87045335-87047223	0.114480	0.574993	0.495259	0.061045	0.262863	0.261189	0.193452	0.123939	0.186403	0.000000	0.224272	0.433987
ENSRNOG00000020235	Hnrnpl	1:86996093-87006776	88.439232	74.193939	90.349983	76.372070	86.589302	87.122810	86.143578	62.075367	78.083862	84.040695	68.629555	71.748878
ENSRNOG00000020308	Ech1	1:87009730-87016005	27.027283	16.428736	20.758606	10.918469	20.728985	21.905626	25.289267	10.591665	15.438756	18.270037	17.389570	13.307995
ENSRNOG00000047624	AABR07002854.1	1:87153798-87155118	0.000000	0.000000	0.000000	0.000000	0.000000	0.000000	0.000000	0.000000	0.000000	0.000000	0.000000	0.000000
ENSRNOG00000020598	LOC100909725	1:87166109-87174821	0.414578	0.000000	0.371925	0.400392	0.431092	0.281781	0.264888	0.281131	0.401448	0.278727	0.450259	0.386158
ENSRNOG00000020433	Actn4	1:87078020-87147333	35.930439	44.834152	43.471027	51.888329	40.234634	37.779659	40.100842	43.068977	46.976902	44.859859	41.462463	43.641376
ENSRNOG00000020628	LOC100361913	1:87180434-87191588	0.760411	0.482025	0.680792	0.666322	0.534732	0.643894	0.515677	0.518270	0.727464	0.720778	0.441713	0.000000
ENSRNOG00000020616	Yif1b	1:87180624-87191185	5.788127	4.450033	5.258934	6.535515	5.062093	4.835392	5.523955	4.144091	7.051555	5.628875	4.368067	4.928659
ENSRNOG00000020636	Spint2	1:87199313-87221892	14.655208	6.536675	5.939148	4.253273	8.973798	8.061694	10.492476	2.924591	6.330144	8.411605	8.518681	2.864169
ENSRNOG00000020676	Ppp1r14a	1:87224677-87232848	13.273066	11.592699	9.064241	4.417779	10.221697	9.450675	10.677565	4.109034	6.215573	6.845715	10.878832	10.694930
ENSRNOG00000020687	Dpf1	1:87248489-87258070	28.060070	15.369304	27.402908	22.066431	29.967176	27.566883	32.977791	20.457317	23.749031	31.079504	17.222643	18.826296
ENSRNOG00000020703	Sipa1l3	1:87260835-87468288	9.889922	6.905042	9.293064	8.319388	10.098423	9.463966	10.049051	7.389265	9.132854	9.282739	7.349296	8.256627
XLOC_005365	XLOC_005365	1:88275528-88299225	0.000000	0.243998	0.000000	0.000000	0.136888	0.185024	0.000000	0.170149	0.250206	0.136304	0.218641	0.197087
ENSRNOG00000046652	Zfp84	1:88324339-88336407	0.460700	0.552802	0.427816	0.450496	0.477020	0.545358	0.402976	0.565671	0.505868	0.617425	0.659148	0.565714
ENSRNOG00000052023	AABR07002885.1	1:88374496-88387424	0.000000	0.265263	0.383082	0.384570	0.646481	0.484399	0.327424	0.272825	0.261928	0.513894	0.255412	0.306810
ENSRNOG00000030932	Zfp14	1:88347716-88367500	2.663563	1.575778	2.009873	2.026778	2.296339	2.508085	2.203041	1.745131	1.937412	1.991248	1.986227	1.633172
ENSRNOG00000048138	Zfp566	1:88409531-88428685	2.222619	1.564074	1.546482	1.867463	3.702376	3.112169	2.057898	1.617880	2.158120	3.446496	1.682772	2.075169
ENSRNOG00000055611	RF00392	1:88411666-88411787	0.049974	0.418303	0.360775	0.551186	0.720597	0.721749	0.271854	0.214602	0.127927	0.906725	0.367266	0.189850
ENSRNOG00000052127	RF00392	1:88419005-88419126	0.450916	0.501366	0.388594	0.832076	1.230573	1.498704	0.203030	0.330795	0.256417	1.013434	0.317184	0.274254
ENSRNOG00000057222	AABR07002868.2	1:87560077-87562987	0.261692	0.192535	0.257008	0.197716	0.485955	0.213581	0.349424	0.205900	0.238522	0.564462	0.614721	0.362395
ENSRNOG00000055519	AABR07002868.1	1:87563975-87568989	1.080223	0.856007	0.000000	0.766896	1.269373	0.893052	1.095941	0.858210	1.083983	0.953907	0.761536	0.926976
ENSRNOG00000045327	RF00001	1:87611917-87612029	0.000000	0.0	0.000000	0.0	0.000000	0.000000	0.0	0.0	0.000000	0.000000	0.0	0.083064
XLOC_005325	XLOC_005325	1:87622626-87625972	0.000000	0.0	0.000000	0.0	0.000000	0.290492	0.0	0.0	0.000000	0.000000	0.0	0.000000
ENSRNOG00000029043	Zfp84	1:87650207-87915794	7.329726	5.529624	8.335517	6.616601	6.848276	6.803462	7.139545	5.944763	6.754603	7.027685	5.542157	5.906639
ENSRNOG00000020774	LOC103690163	1:87790104-87801872	2.282731	1.742075	1.824338	1.296104	1.755244	1.816515	1.837309	1.434463	1.544968	2.091232	1.697851	1.556546
ENSRNOG00000046937	LOC103690038	1:87817893-87825333	2.700343	1.896732	2.610074	2.412766	2.755775	2.941887	2.829573	1.811365	2.174308	2.006928	1.804611	1.983564
ENSRNOG00000020495	Eif3k	1:87927141-87937516	32.612640	24.317307	33.975620	24.245541	23.939558	25.644773	33.965561	24.155237	26.602343	27.398935	24.252998	20.401535
ENSRNOG00000056770	RF00411	1:87931357-87931487	1.100482	0.815933	1.043965	1.788601	1.756232	0.524913	0.687424	0.824715	1.591041	1.782218	1.682183	0.547914
ENSRNOG00000020505	Map4k1	1:87938042-87965639	0.563627	0.563505	0.774332	0.644068	0.583557	0.456939	0.523545	0.807971	0.897038	0.433406	0.593895	0.588897
ENSRNOG00000033744	Rasgrp4	1:88078350-88094330	0.461129	0.592909	0.441414	0.672301	0.764414	0.209335	0.383387	0.338796	0.489093	0.420738	0.388610	0.362940
ENSRNOG00000024036	Fam98c	1:88095241-88098785	8.131891	8.767864	10.536739	10.199671	9.171440	6.854644	8.613621	9.572413	9.445279	10.373836	8.906391	7.758647
ENSRNOG00000051915	Spred3	1:88099921-88112683	9.038024	8.812878	8.853387	12.192808	7.480305	9.902187	10.129303	9.784788	11.870257	5.799689	7.565789	6.725575
ENSRNOG00000023931	Ggn	1:88113445-88116548	0.228519	0.065086	0.174188	0.342699	0.134873	0.248832	0.166651	0.274878	0.292878	0.216162	0.150681	0.146890
ENSRNOG00000037580	Psmd8	1:88116812-88123643	34.705715	25.866522	36.739067	31.536409	28.748087	28.863020	34.416443	25.407570	30.654095	27.379360	22.246132	22.606380
ENSRNOG00000060693	Catsperg	1:88131554-88162583	0.401275	0.970877	0.608102	0.812692	0.434106	0.592119	0.311530	0.930760	0.488608	0.396949	0.968603	0.672607
ENSRNOG00000049868	Kcnk6	1:88169378-88176610	0.501582	0.524600	0.296276	0.369725	0.430285	0.281785	0.271639	0.293299	0.466002	0.343086	0.400845	0.383970
ENSRNOG00000055286	LOC103689986	1:88182155-88192969	4.001256	3.456189	0.000000	0.000000	4.152281	3.888683	4.370336	3.276071	0.000000	4.070482	3.161374	3.665789
ENSRNOG00000056651	LOC103690068	1:88182390-88193346	0.719672	0.000000	0.558092	0.382602	0.519103	0.637309	0.000000	0.410125	0.559198	0.000000	0.382756	0.000000
ENSRNOG00000046305	LOC103690114	1:88206813-88216556	0.000000	1.807427	0.000000	1.365836	0.000000	1.907923	0.000000	1.520380	1.508486	0.000000	0.000000	0.000000
ENSRNOG00000048894	Zfp74	1:88232617-88240057	3.049949	2.154019	2.720526	2.654370	2.968155	3.243236	3.012182	1.901495	2.318755	2.963870	1.876016	2.023691
XLOC_020821	XLOC_020821	1:88249464-88251100	0.140495	0.272821	0.060761	0.303448	0.423572	0.145106	0.000000	0.167156	0.212321	0.285837	0.327418	0.247392
ENSRNOG00000055119	AABR07002882.1	1:88258899-88268984	0.548656	0.496859	0.586558	0.349694	0.442485	0.416469	0.640561	0.542361	0.544833	0.263631	0.179926	0.229185
XLOC_005363	XLOC_005363	1:88259015-88262362	0.263412	0.242112	0.070750	0.200676	0.129091	0.175826	0.079747	0.361565	0.394808	0.203735	0.487061	0.343725
ENSRNOG00000046867	AABR07002890.1	1:88451958-88453578	9.800369	7.962493	10.241286	9.063279	9.590012	9.689044	10.748931	8.179281	9.721005	8.688267	7.927940	7.124766
ENSRNOG00000056062	AABR07002893.1	1:88510895-88516129	1.403803	1.037101	1.243077	1.107472	1.225550	1.372850	1.353847	1.117294	1.091851	0.841468	1.150162	0.952776
XLOC_005382	XLOC_005382	1:88531940-88539430	0.790160	0.950239	0.809309	0.708863	0.742652	0.803962	0.803871	0.817615	0.724018	1.198363	1.030203	0.795728
XLOC_020831	XLOC_020831	1:88531971-88535666	0.271050	0.239181	0.157665	0.153693	0.280119	0.289870	0.227552	0.073358	0.245768	0.276226	0.127069	0.000000
ENSRNOG00000047627	AABR07002896.1	1:88546839-88623567	28.282158	19.784561	26.471033	16.915552	21.458069	19.891970	24.879038	16.038412	17.526506	19.256769	17.995100	18.638597
ENSRNOG00000054776	AABR07002898.1	1:88611956-88614236	0.219166	0.438220	0.134107	0.475501	0.426924	0.363808	0.146384	0.332940	0.286827	0.384959	0.355699	0.320494
ENSRNOG00000056429	AABR07002902.1	1:88631903-88646454	0.767190	0.658410	0.558508	0.474171	0.503425	0.000000	0.548575	0.375565	0.015446	0.000000	0.399559	0.327623
ENSRNOG00000048194	LOC100912380	1:88652446-88657845	49.719444	32.375008	39.136272	31.698092	33.609074	36.318951	11.282069	28.489912	6.491186	32.686882	22.946201	30.173643
ENSRNOG00000045655	Tbcb	1:88680856-88686615	17.165495	10.860166	18.651194	19.235165	17.373783	14.873261	18.492170	16.265078	17.197874	16.241451	14.042107	15.396697
ENSRNOG00000020799	LOC103690054	1:88686731-88688258	3.359211	2.121107	3.385004	2.273819	2.910722	2.353770	2.963832	2.095979	4.460975	3.293544	3.921062	3.822917
ENSRNOG00000047959	Ovol3	1:88688299-88690534	0.000000	0.000000	0.000000	0.000000	0.000000	0.000000	0.000000	0.000000	0.000000	0.000000	0.0	0.000000
ENSRNOG00000020807	NEWGENE_1306714	1:88694824-88734223	0.055273	0.278536	0.045811	0.020754	0.121258	0.235629	0.113932	0.090163	0.097346	0.062232	0.146209	0.066888
XLOC_005398	XLOC_005398	1:88743772-88746979	0.212650	0.000000	0.000000	0.000000	0.000000	0.374527	0.268064	0.286830	0.000000	0.210178	0.398929	0.000000
XLOC_005410	XLOC_005410	1:88853385-88854683	0.000000	0.138461	0.392437	0.0	0.0	0.000000	0.000000	0.000000	0.000000	0.086610	0.000000	0.000000
XLOC_020861	XLOC_020861	1:88853753-88854380	0.084306	0.176698	0.000000	0.0	0.0	0.000000	0.000000	0.078707	0.000000	0.000000	0.354201	0.184043
ENSRNOG00000020839	Lrfn3	1:88819445-88826302	8.122149	6.364744	9.961887	9.500790	7.407215	7.430790	9.168344	8.628584	8.116008	7.278680	6.615224	8.303762
ENSRNOG00000057115	RF00004	1:88820687-88820867	0.000000	0.113784	0.000000	0.660917	0.426957	0.373036	0.014497	0.226736	0.450696	0.319873	0.572364	0.151912
ENSRNOG00000020849	Hcst	1:88879428-88881460	0.160867	0.068163	0.076013	0.128598	0.000000	0.080211	0.000000	0.0	0.055771	0.000000	0.0	0.0
ENSRNOG00000020845	Tyrobp	1:88875375-88879303	5.377403	4.396899	4.547164	3.382399	5.538886	3.479408	4.043171	1.554536	5.017211	5.049833	4.456434	4.966320
XLOC_005420	XLOC_005420	1:88884187-88885620	0.498707	0.113523	0.141830	0.392332	0.438491	0.245131	0.040969	0.264832	0.045783	0.358162	0.125644	0.388981
ENSRNOG00000025111	Nfkbid	1:88885937-88892615	0.307822	0.568466	0.551640	0.462187	0.483065	0.605949	0.415089	0.385188	0.357668	0.445319	0.536457	0.337491
ENSRNOG00000020821	Clip3	1:88750462-88765220	58.823841	62.911827	74.412819	68.826683	55.610790	57.638737	66.189545	67.737526	61.459129	58.425705	71.205017	55.675484
ENSRNOG00000047045	Sdhaf1	1:88756533-88780425	12.956704	9.770659	12.118767	12.901325	10.723042	9.912249	12.264567	10.223330	12.930504	10.853763	10.955038	11.677172
ENSRNOG00000052697	RF00100	1:88769417-88769725	0.031275	0.090644	0.026014	0.058938	0.149180	0.050510	0.000000	0.074424	0.027941	0.131158	0.000000	0.074332
ENSRNOG00000048447	AABR07002906.1	1:88779989-88780415	3.239924	2.159445	3.349130	2.280666	1.564404	1.913662	2.410925	1.398144	2.719790	2.065047	1.309278	2.264503
ENSRNOG00000020873	Nphs1	1:88922433-88950559	0.063707	0.039489	0.128136	0.023117	0.042772	0.031832	0.043379	0.005569	0.026645	0.343378	0.023636	0.011381
ENSRNOG00000057578	Prodh2	1:88955135-88968504	1.045246	0.273734	1.385989	0.786160	0.522204	1.309665	0.372827	0.833767	0.828099	0.123261	0.574145	0.935071
ENSRNOG00000061774	AABR07002910.1	1:88970768-88977882	0.144048	0.175245	0.116877	0.054342	0.162154	0.184671	0.160746	0.129516	0.155495	0.087018	0.134285	0.119093
ENSRNOG00000024677	Arhgap33	1:88978344-88989552	23.550037	21.925407	30.267467	30.149763	26.051907	28.565964	27.894377	28.410988	24.556879	23.569469	27.831347	27.408352
ENSRNOG00000024625	Proser3	1:88994562-89007041	1.591148	1.437048	1.742102	1.581958	1.879300	1.651348	1.590717	1.358024	1.374358	1.908270	1.833182	1.093999
ENSRNOG00000020922	Hspb6	1:89007008-89014355	5.469131	7.842541	7.052573	4.341492	5.483922	4.904785	6.809256	3.962434	5.444086	5.110400	7.182015	5.838963
ENSRNOG00000060188	AC141526.2	1:89007624-89007700	1.308115	1.081898	0.746072	0.896063	0.887160	1.423273	1.068647	1.379305	0.796916	1.412120	1.648720	1.099955
ENSRNOG00000020929	Lin37	1:89010257-89014189	10.536013	7.575984	9.213189	8.580009	9.684777	8.509329	10.136551	8.087437	8.356757	9.436774	7.631807	7.485992
ENSRNOG00000020851	Aplp1	1:88897532-88908750	397.969116	322.068207	397.718567	330.269592	343.890900	360.010986	428.465210	268.357269	354.514282	270.688141	306.275238	315.453094
ENSRNOG00000024497	U2af1l4	1:89016087-89042509	17.155195	14.743423	15.023550	11.551954	12.473946	13.601316	16.548149	11.180840	13.767955	15.826354	12.450080	11.144207
ENSRNOG00000020941	Psenen	1:89016096-89019863	45.932240	34.528160	41.501240	12.966166	36.391125	33.304588	20.004782	28.927174	15.950285	37.638866	31.385399	35.355236
ENSRNOG00000020957	Igflr1	1:89020341-89022219	0.003137	0.000000	0.078172	0.049170	0.000000	0.113091	0.000000	0.000000	0.000000	0.000000	0.000000	0.000000
ENSRNOG00000055525	Kmt2b	1:89023200-89042176	8.035173	6.925439	7.725795	7.703327	8.969552	8.573004	7.395252	6.623892	7.616148	8.542124	8.089395	6.708695
ENSRNOG00000050364	Mir3569	1:89042806-89042881	0.242518	0.308923	0.107178	0.235484	0.477824	0.0	0.000000	0.0	0.241542	0.398862	0.328723	0.633495
ENSRNOG00000042465	Zbtb32	1:89043086-89045586	0.000000	0.000000	0.008971	0.018105	0.009061	0.005377	0.000000	0.016563	0.031716	0.017731	0.0	0.000000
ENSRNOG00000037485	LOC688924	1:89149998-89150862	0.000000	0.0	0.0	0.0	0.0	0.0	0.0	0.0	0.000000	0.0	0.0	0.0
ENSRNOG00000024309	Cox6b1	1:89075975-89084859	88.022079	68.066628	97.236847	70.968750	61.786884	70.324532	99.743622	63.978546	76.660637	73.137360	58.327148	54.230820
ENSRNOG00000024288	Etv2	1:89091239-89094530	0.000000	0.0	0.0	0.0	0.000000	0.000000	0.004493	0.016863	0.000000	0.0	0.0	0.0
ENSRNOG00000024278	Rbm42	1:89099277-89109230	22.313618	16.931877	22.756939	18.242908	20.805191	18.674452	23.429306	15.254221	20.608606	20.961443	16.236866	15.099880
ENSRNOG00000021021	Ffar2	1:89268938-89269930	0.060199	0.015555	0.129520	0.035572	0.167244	0.205012	0.156853	0.0	0.0	0.0	0.020510	0.033361
ENSRNOG00000037467	Ffar3	1:89302039-89303968	0.052683	0.0	0.0	0.041507	0.0	0.019935	0.017020	0.000000	0.027267	0.000000	0.0	0.0
ENSRNOG00000055934	Dmkn	1:89215211-89229696	0.985538	0.220717	0.775807	0.727307	1.399860	0.878558	1.621019	0.727840	0.594128	0.634540	0.276095	0.879080
ENSRNOG00000024000	Cd22	1:89314558-89329418	0.184499	0.094077	0.072719	0.093744	0.152215	0.150532	0.070360	0.082228	0.105784	0.151450	0.024314	0.070456
ENSRNOG00000020985	Atp4a	1:89162639-89175811	0.022750	0.005668	0.008309	0.024082	0.000000	0.019048	0.008874	0.000000	0.010803	0.004578	0.031117	0.009080
ENSRNOG00000021015	Sbsn	1:89177963-89208424	1.671375	1.489203	1.470022	1.747263	1.408688	1.718669	1.912835	1.266746	1.704223	1.593582	1.678992	1.339452
ENSRNOG00000021006	Tmem147	1:89177992-89179825	32.325481	18.506897	28.133379	18.674107	25.627977	24.173607	26.999674	14.242481	22.576355	25.866482	18.272554	19.741318
ENSRNOG00000021029	Hamp	1:89368021-89369960	0.000000	0.000000	0.035589	0.0	0.000000	0.000000	0.0	0.033946	0.0	0.000000	0.0	0.000000
XLOC_005455	XLOC_005455	1:89362661-89367445	1.972895	1.283758	1.073244	0.344258	1.291879	1.305158	1.377886	0.174032	0.928306	0.674884	1.470863	0.732766
XLOC_020905	XLOC_020905	1:89362786-89366025	0.277733	0.143946	0.104776	0.021994	0.039295	0.103450	0.227819	0.020121	0.060377	0.052757	0.055866	0.123283
ENSRNOG00000021023	Mag	1:89345429-89360733	106.880836	116.259979	77.689140	42.169563	78.900612	89.166969	107.852417	34.038445	53.371937	53.044353	103.280777	102.018974
ENSRNOG00000053725	Usf2	1:89371794-89382463	34.723259	25.227497	34.740681	28.471104	35.041100	34.574425	35.555016	21.464218	33.633480	30.232573	24.848196	25.522148
ENSRNOG00000021060	Fam187b	1:89408935-89416745	0.034302	0.020354	0.000000	0.067564	0.037406	0.051746	0.024091	0.0	0.0	0.0	0.0	0.000000
ENSRNOG00000021053	Lsr	1:89383519-89399041	5.191399	3.882517	3.668677	3.112675	3.175103	5.668272	2.902565	2.439730	3.817116	4.238002	4.498959	3.725162
ENSRNOG00000021062	Fxyd5	1:89464860-89474252	4.318283	3.780636	4.400140	2.319294	2.892637	2.424709	3.539195	2.149536	2.578647	3.649163	3.403183	3.569532
ENSRNOG00000021067	Fxyd7	1:89474601-89483988	17.006069	0.378044	20.928629	0.742735	8.074320	17.505917	17.956964	1.323523	0.531610	12.908050	17.815512	24.612158
ENSRNOG00000021079	Fxyd1	1:89474601-89488223	16.010605	24.056404	17.294868	21.948643	12.714458	17.972174	12.890286	21.809584	21.493193	12.866804	13.911991	10.627406
XLOC_005473	XLOC_005473	1:89518911-89532005	0.161450	0.097879	0.225428	0.181476	0.119151	0.361900	0.497696	0.044427	0.123635	0.120327	0.488101	0.292330
ENSRNOG00000021097	Hpn	1:89534106-89543967	0.093432	0.058133	0.000000	0.147492	0.162169	0.058869	0.043854	0.144965	0.051286	0.151604	0.045252	0.153050
ENSRNOG00000021095	Fxyd3	1:89491636-89510153	1.553318	1.065595	1.891532	1.089934	1.450080	1.665809	1.278818	0.751502	1.394329	1.933311	1.028008	1.210136
ENSRNOG00000021087	Lgi4	1:89491654-89502974	12.551421	11.946752	14.460681	12.558573	16.129807	14.119151	11.434595	8.583272	13.685282	16.999151	11.777614	12.091686
ENSRNOG00000021102	Scn1b	1:89550738-89560719	69.003853	135.615356	92.272766	94.289383	64.534813	71.101341	78.111687	80.178238	131.139069	69.878578	128.965958	128.214081
ENSRNOG00000056095	AABR07071898.1	1:89551123-89551427	0.008705	1.049021	0.010223	0.915717	0.011153	0.007843	0.011156	0.010891	0.009806	0.006312	0.588385	0.532057
ENSRNOG00000028984	RGD1563307	1:89645769-89646590	0.576078	0.120638	0.293501	0.144957	0.172403	0.344798	0.198294	0.156592	0.338749	0.051537	0.148661	0.377624
ENSRNOG00000061315	AABR07002928.2	1:89649636-89689038	0.671843	0.456842	0.464787	0.768083	0.566282	0.595077	0.498894	0.804130	0.363826	0.594320	0.703044	0.684815
ENSRNOG00000023314	Scgb2b24	1:89778890-89944752	0.000000	0.000000	0.000000	0.000000	0.000000	0.000000	0.000000	0.000000	0.000000	0.000000	0.000000	0.000000
ENSRNOG00000037415	AABR07002938.1	1:89869772-89871299	1.699494	1.118221	1.413868	1.503215	1.446107	1.520977	1.880164	1.660551	1.606785	1.582152	1.534422	1.079168
ENSRNOG00000021106	Gramd1a	1:89563976-89590490	15.159906	15.672400	17.583626	15.596373	14.003913	16.368740	14.669556	14.814099	14.777704	16.667450	15.312698	12.862542
XLOC_005525	XLOC_005525	1:90498080-90499420	0.213745	0.092051	0.000000	0.105157	0.177928	0.274725	0.272490	0.0	0.375030	0.251792	0.145649	0.197424
ENSRNOG00000032733	AABR07002966.1	1:90729274-90729660	0.028318	0.0	0.101639	0.0	0.0	0.0	0.0	0.0	0.0	0.0	0.0	0.0
ENSRNOG00000021133	Lsm14a	1:90200876-90246297	32.632927	24.723463	35.038319	25.527721	36.552956	34.310017	35.135727	26.179897	29.059597	35.271614	26.470549	26.423729
ENSRNOG00000059099	RF00560	1:90798007-90798138	0.000000	0.000000	0.000000	0.000000	0.000000	0.000000	0.000000	0.000000	0.009896	0.000000	0.000000	0.000000
ENSRNOG00000021137	Kctd15	1:90506697-90520344	6.079259	4.455509	7.428060	5.255761	7.762145	6.920325	5.487101	3.952785	6.768244	10.571171	5.013690	4.937799
ENSRNOG00000023296	AABR07002945.1	1:89967031-90000386	0.966341	0.577520	0.812552	1.517749	1.194906	1.010972	0.790698	0.705105	1.050011	1.415078	1.225749	0.811540
ENSRNOG00000061556	RF00614	1:89994409-89994535	0.335757	0.012973	0.021942	0.000000	0.058409	0.572615	0.374372	0.806586	0.144545	0.382496	0.817869	0.333886
ENSRNOG00000021113	Uba2	1:90011306-90035522	25.698919	20.027414	22.554480	23.593428	23.411068	21.621944	25.839462	21.165871	21.853724	22.640587	19.632463	18.628967
ENSRNOG00000021119	Pdcd2l	1:90045509-90057923	4.101333	2.957355	3.412059	3.248323	3.325433	3.961181	3.220008	3.337352	3.332776	3.393731	2.835119	2.848968
ENSRNOG00000023150	Gpi	1:90063411-90091287	209.939972	177.252350	237.496277	216.283661	177.648804	190.776764	241.039444	203.575821	211.751770	183.038147	171.090836	168.829971
XLOC_020943	XLOC_020943	1:90092193-90096264	0.272486	0.538834	0.190216	0.388737	0.432373	0.292881	0.236478	0.329410	0.242624	0.350396	0.408483	0.297681
ENSRNOG00000021129	RGD1308428	1:90097334-90176105	12.303598	10.627284	11.048851	9.216446	12.287683	12.024203	10.441166	9.569328	9.488685	12.236030	11.448174	11.404182
ENSRNOG00000051350	AABR07002945.3	1:90123234-90123470	0.104673	0.822925	0.359522	0.614047	0.313927	0.667136	0.278112	0.987610	0.342027	0.801592	0.461756	0.487364
ENSRNOG00000051284	AABR07002945.2	1:90127187-90135647	1.839333	1.987327	1.590379	2.863509	2.577252	2.149631	1.564194	2.816566	2.130606	2.193562	3.907583	2.000882
XLOC_005564	XLOC_005564	1:91330119-91331291	0.151966	0.063816	0.173827	0.062269	0.234471	0.364468	0.268668	0.036920	0.250737	0.099797	0.239014	0.000000
XLOC_021023	XLOC_021023	1:91428025-91431555	0.247503	0.051060	0.056669	0.058578	0.150826	0.168616	0.052217	0.107179	0.230205	0.079652	0.135101	0.160786
ENSRNOG00000010918	Cebpa	1:91363492-91366164	3.899731	2.444993	3.661260	2.485445	3.708743	3.072985	3.528625	2.556859	3.317030	3.618719	2.472990	3.248657
ENSRNOG00000052945	AABR07002969.1	1:90820595-90848674	7.813112	7.634361	8.874549	7.241774	7.919857	8.587985	8.306382	7.979957	9.145233	9.628568	6.287549	7.350194
ENSRNOG00000056960	RF00416	1:90858278-90858410	0.000000	0.000000	0.000000	0.000000	0.000000	0.000000	0.000000	0.000000	0.000000	0.000000	0.000000	0.000000
ENSRNOG00000053019	RF00560	1:90858279-90858410	0.000000	0.000000	0.000000	0.000000	0.000000	0.000000	0.000000	0.000000	0.019793	0.000000	0.000000	0.000000
ENSRNOG00000060312	LOC108348197	1:90919076-90921047	4.538795	1.004758	6.175488	1.073950	4.139313	1.038821	6.277750	0.863392	3.984659	5.295271	4.640098	0.377720
ENSRNOG00000050148	AABR07002973.1	1:90948960-90949386	3.213792	2.187660	3.349130	2.280666	1.564923	1.913662	2.441158	1.398144	2.863013	2.095913	1.309278	2.380877
ENSRNOG00000037541	LOC108348111	1:90948976-90949332	10.618299	8.630223	10.186582	9.975259	9.444604	8.735006	10.435666	8.303217	10.041626	8.642017	9.060925	9.801289
ENSRNOG00000020830	LOC108348128	1:90951771-90962466	0.446389	0.022292	0.589569	0.061477	0.420846	0.521643	0.627021	0.339294	0.036021	0.283727	0.096428	0.007795
ENSRNOG00000047943	LOC108348106	1:90957133-90962466	5.067739	3.709866	7.922173	6.833718	2.998338	3.284581	1.635532	1.892734	4.316985	3.382555	4.032386	0.116946
ENSRNOG00000055219	RF00100	1:90959650-90959958	0.000000	0.049988	0.026014	0.058938	0.154428	0.050510	0.000000	0.074424	0.027941	0.131158	0.000000	0.000000
ENSRNOG00000050104	LOC108348122	1:90962707-90978907	47.795692	51.955070	59.631508	53.199997	44.265945	46.734566	54.174519	54.312782	53.994881	47.055523	40.850510	49.102814
XLOC_021004	XLOC_021004	1:90982355-90995129	0.679705	0.651715	0.677307	0.000000	0.544282	0.787414	0.663933	0.494112	0.558201	0.276470	0.000000	0.520674
ENSRNOG00000049708	Wdr62	1:90995545-91034588	0.000000	0.000000	0.032457	0.000000	0.000000	0.000000	0.064734	0.000000	0.068056	0.000000	0.178483	0.031223
ENSRNOG00000024880	Ovol3	1:91038886-91041121	0.000000	0.000000	0.000000	0.000000	0.000000	0.000000	0.000000	0.000000	0.000000	0.000000	0.000000	0.000000
ENSRNOG00000050560	Polr2i	1:91041214-91042230	7.277395	4.707735	7.007483	4.766295	6.187741	4.854586	6.041242	4.247954	0.000000	6.985624	0.000000	0.038055
ENSRNOG00000020781	LOC103690005	1:91042635-91048483	18.201994	15.363423	17.026814	17.707325	15.963518	13.325186	16.755169	14.686406	15.845417	15.097601	12.970693	14.077879
ENSRNOG00000045747	Capns1	1:91058529-91063928	49.664494	32.023998	38.350544	31.679028	33.353760	27.969858	74.601875	27.737267	54.572411	40.624722	34.816143	29.623327
ENSRNOG00000050015	Cox7a1	1:91071120-91094841	0.562312	0.454020	0.937159	0.394977	0.369721	0.459397	0.323319	0.420502	0.337877	0.524528	0.322865	0.151905
XLOC_021007	XLOC_021007	1:91079720-91094806	0.577504	0.636444	0.664965	0.552308	0.702976	0.909217	0.658213	0.485603	0.774448	1.206353	0.500247	0.679099
XLOC_021008	XLOC_021008	1:91085769-91086817	0.249106	0.224959	0.199316	0.115186	0.308553	0.250415	0.287375	0.112559	0.171098	0.030743	0.093456	0.203404
ENSRNOG00000048407	LOC100912070	1:91152635-91156060	0.000000	0.000000	0.000000	0.000000	0.000000	0.000000	0.000000	0.000000	0.000000	0.000000	0.000000	0.000000
XLOC_005546	XLOC_005546	1:91168411-91171832	2.044735	2.482748	2.689055	3.685101	2.288279	2.946197	2.339018	3.412303	3.529776	2.367911	3.389207	2.658785
XLOC_021009	XLOC_021009	1:91168476-91171972	0.202410	0.222552	0.318498	0.205632	0.167275	0.290168	0.132583	0.240400	0.289671	0.000000	0.008134	0.175805
ENSRNOG00000013250	NEWGENE_1310561	1:91172867-91178801	0.260190	3.602400	3.416272	2.398481	0.384927	0.660031	2.992674	0.782115	0.000000	0.259525	0.614131	0.040452
XLOC_021011	XLOC_021011	1:91205385-91211722	1.749425	1.719200	0.000000	1.949622	0.186663	1.745557	1.886682	1.389283	1.633490	1.898188	1.420861	1.584044
ENSRNOG00000056667	RF00560	1:91464515-91464629	0.090966	0.254302	0.0	0.135147	0.000000	0.0	0.0	0.077742	0.090575	0.0	0.0	0.0
XLOC_021026	XLOC_021026	1:91465045-91465699	0.000000	0.0	0.050835	0.000000	0.000000	0.0	0.0	0.000000	0.501510	0.0	0.100245	0.047812
ENSRNOG00000032232	Snrpg	1:91588228-91588609	6.358519	2.036841	1.299606	1.013753	7.556754	2.412365	2.615393	6.634873	2.257528	4.743294	1.118205	2.584598
ENSRNOG00000037393	Wdr88	1:91488066-91526570	0.000000	0.0	0.000000	0.000000	0.000000	0.022755	0.000000	0.0	0.0	0.0	0.0	0.0
ENSRNOG00000011584	Gpatch1	1:91529112-91578048	5.109273	4.389583	4.337643	4.095059	4.905894	4.406015	5.227327	4.321052	4.728210	4.458614	4.733675	3.490858
ENSRNOG00000010938	Slc7a10	1:91433030-91464103	11.484438	6.579144	8.584410	8.541552	13.049262	5.403229	7.960626	6.217691	9.454903	10.746288	7.838041	4.615590
ENSRNOG00000011451	Lrp3	1:91448361-91462603	19.753489	13.092744	19.765276	17.458006	17.419649	17.562933	18.194782	14.756522	19.298918	15.159691	14.397765	16.748837
ENSRNOG00000012719	Tdrd12	1:91740933-91811547	0.027914	0.014209	0.007507	0.049169	0.023213	0.007922	0.021981	0.011989	0.000000	0.049829	0.009510	0.000000
ENSRNOG00000037380	AC136661.1	1:91746486-91747174	2.157942	1.301234	1.795654	0.932837	1.327652	1.872424	1.655373	0.948146	1.312312	1.471844	0.823539	0.844694
ENSRNOG00000022393	Faap24	1:91596333-91663467	1.351889	1.052233	0.693428	0.618248	1.472758	0.996422	1.002960	0.880346	0.581142	1.283988	1.310227	1.534810
ENSRNOG00000011885	Rhpn2	1:91596397-91657395	3.341972	1.629217	2.918793	1.797152	2.530216	3.057728	2.548544	1.479267	1.571290	2.273377	1.772099	1.877019
ENSRNOG00000012140	Cep89	1:91638244-91706868	3.685266	3.911452	2.655193	3.723632	3.985117	3.436480	2.674211	3.333119	2.760651	4.403717	3.820082	3.290220
ENSRNOG00000012877	Rgs9bp	1:91855270-91855983	0.080512	0.142924	0.184184	0.293366	0.216934	0.267064	0.154348	0.216334	0.196005	0.154793	0.436806	0.203375
ENSRNOG00000059386	Nudt19	1:91820342-91832058	9.811752	6.123348	8.425803	7.062432	7.857240	8.499606	8.316517	6.124385	7.318768	7.704381	5.457931	6.999384
ENSRNOG00000050827	Pdcd5	1:91960463-91966438	4.978606	4.192798	3.483140	2.451233	3.937723	5.893978	2.988432	3.766363	4.084136	4.883523	4.657579	5.108358
ENSRNOG00000052814	Ankrd27	1:91857057-91958763	5.143606	6.269719	5.993810	8.004482	5.930790	6.178067	4.895474	6.863019	6.401189	5.768308	5.859966	7.594248
ENSRNOG00000052011	AABR07003001.1	1:92231224-92238216	0.000000	0.187873	0.099239	0.279749	0.205047	0.143362	0.173567	0.680501	0.374517	0.029056	0.172165	0.319916
ENSRNOG00000059068	AABR07003001.2	1:92334361-92351131	0.000000	0.025353	0.0	0.000000	0.000000	0.0	0.0	0.0	0.000000	0.000000	0.085387	0.0
XLOC_021100	XLOC_021100	1:93105344-93126902	0.034434	0.155406	0.085142	0.189212	0.046049	0.045277	0.024184	0.118241	0.085762	0.065075	0.062570	0.115020
XLOC_005696	XLOC_005696	1:93105881-93113389	0.000000	0.000000	0.000000	0.305810	0.000000	0.000000	0.000000	0.000000	0.000000	0.000000	0.000000	0.000000
XLOC_005700	XLOC_005700	1:93126172-93126955	0.000000	0.000000	0.000000	0.000000	0.000000	0.000000	0.000000	0.000000	0.126891	0.000000	0.000000	0.811954
XLOC_005669	XLOC_005669	1:92775987-92821787	0.323630	0.924957	0.883765	0.921713	0.405665	0.747637	0.784991	0.916471	1.073830	0.372184	0.888898	1.223823
ENSRNOG00000013938	Tshz3	1:92703080-92774975	3.318228	11.503287	9.400937	13.048953	4.502074	6.096953	6.978749	11.759809	12.063976	5.218581	8.681188	10.815860
ENSRNOG00000054448	RF00100	1:92703107-92775040	0.484380	1.562229	1.256708	1.080146	0.373118	0.688856	0.824860	1.120978	1.256104	0.507542	0.945110	1.087009
ENSRNOG00000021573	Dpy19l3	1:92002927-92069160	21.483740	14.902478	21.209303	19.373688	21.394312	21.407560	27.443848	15.917564	19.122414	15.216123	16.760298	16.184509
ENSRNOG00000057350	AABR07002997.1	1:92088190-92088447	9.893388	7.573396	6.814123	6.054589	8.355573	8.892666	9.593342	3.337896	6.365298	8.169864	4.282237	6.748382
ENSRNOG00000057563	AABR07002997.2	1:92090250-92090556	0.068135	0.109974	0.092060	0.086883	0.084794	0.076651	0.077581	0.096282	0.077148	0.076209	0.102968	0.075384
XLOC_021052	XLOC_021052	1:92193460-92200479	0.000000	0.435805	0.229843	0.410020	0.033823	0.155136	0.191174	0.505025	0.298784	0.030965	0.451424	0.345672
XLOC_005640	XLOC_005640	1:92198933-92200139	0.000000	0.000000	0.000000	0.244903	0.000000	0.000000	0.000000	0.128842	0.000000	0.000000	0.000000	0.327451
XLOC_005603	XLOC_005603	1:92227005-92229725	0.109524	0.227852	0.148235	0.030562	0.107963	0.122687	0.184274	0.430546	0.224076	0.119745	0.152368	0.352524
XLOC_021159	XLOC_021159	1:94270175-94332393	0.231843	0.567812	0.215336	0.306875	0.458900	0.352672	0.276594	0.597608	0.399273	0.425086	0.631604	0.494925
ENSRNOG00000014163	Zfp536	1:93851454-93949187	14.211499	7.313537	9.978491	5.178847	10.669881	12.356013	9.885315	4.482662	6.054818	8.992170	7.412558	6.175538
ENSRNOG00000054000	AABR07003030.1	1:94022752-94022882	0.000000	0.287699	0.000000	0.214812	0.534138	0.139862	0.000000	0.060846	0.139344	0.137978	0.431170	0.062378
ENSRNOG00000055070	AABR07003030.2	1:94027897-94152068	0.541342	0.856264	0.279777	0.669599	0.540251	0.819197	0.256337	0.395033	0.468008	0.599762	0.246912	0.723325
ENSRNOG00000014463	Uri1	1:94346514-94404211	12.845543	10.946259	13.849037	12.905932	11.042778	12.553765	13.417221	12.062737	13.959048	10.786863	12.738949	11.675450
ENSRNOG00000056351	RF00066	1:94561902-94561963	0.125340	0.000000	0.0	0.0	0.0	0.0	0.0	0.0	0.206261	0.0	0.000000	0.000000
ENSRNOG00000014786	Ccne1	1:94485832-94494980	5.069777	3.265780	3.988154	4.801543	3.031317	4.186887	4.509097	4.363389	3.825268	4.014312	3.038316	3.614634
ENSRNOG00000014966	LOC690000	1:94579080-94587219	11.835752	7.024101	9.425086	7.975406	9.336329	10.806678	9.949012	7.410369	9.367470	8.349497	7.911556	8.647989
ENSRNOG00000052041	RF00026	1:94591079-94591185	0.000000	0.000000	0.0	0.0	0.0	0.0	0.0	0.000000	0.000000	0.000000	0.402255	0.000000
ENSRNOG00000027646	Pop4	1:94661128-94669461	13.280591	10.461020	13.950499	10.435316	11.599356	12.224195	12.442058	11.096742	10.770638	11.232057	10.265222	8.117370
ENSRNOG00000027370	AC120712.1	1:94757662-94761374	0.011903	0.012303	0.025610	0.0	0.0	0.013512	0.025037	0.0	0.000000	0.0	0.032444	0.0
ENSRNOG00000054492	RF00026	1:94762522-94762628	0.000000	0.0	0.0	0.0	0.0	0.0	0.0	0.0	0.0	0.0	0.0	0.0
ENSRNOG00000015168	LOC365238	1:94780650-94784451	0.000000	0.065119	0.013103	0.010526	0.038711	0.027333	0.000000	0.038194	0.0	0.061869	0.032471	0.026732
ENSRNOG00000051237	AC120712.3	1:94687356-94727737	0.159193	0.395155	0.168141	0.544833	0.177065	0.286464	0.079181	0.589628	0.193295	0.198489	0.543260	0.604575
ENSRNOG00000046335	AC120712.2	1:94712021-94712086	0.000000	0.032140	0.179110	0.172827	0.034389	0.050551	0.000000	0.007888	0.000000	0.000000	0.061203	0.308217
ENSRNOG00000032204	Uqcrb	1:94718402-94718876	54.516132	48.379253	52.719936	38.382797	42.053822	43.123470	52.142235	48.505791	43.452126	47.426331	41.185585	38.174995
ENSRNOG00000059938	AC120712.4	1:94788461-94810667	4.381003	3.655134	3.867539	4.167822	4.486829	3.321109	3.597269	3.480050	3.940292	4.595937	4.128685	3.868544
ENSRNOG00000061879	AABR07071904.2	1:94834180-94836776	0.128668	0.502792	0.000000	0.104948	0.218414	0.136683	0.202203	0.195137	0.140032	0.442487	0.057483	0.127434
ENSRNOG00000052237	AABR07071904.1	1:94836296-94840706	0.959930	0.658964	0.939695	0.670945	0.895980	0.857187	1.023890	0.608868	0.944423	0.919697	0.758728	0.467573
XLOC_021241	XLOC_021241	1:94847053-94861919	0.216414	0.060516	0.240797	0.062963	0.179531	0.112278	0.349543	0.147515	0.114098	0.292909	0.064349	0.337645
XLOC_005785	XLOC_005785	1:94847297-94868026	1.960865	1.016805	1.429346	0.862900	1.789561	1.033302	0.746005	1.157963	0.617808	1.377251	1.450660	1.489901
ENSRNOG00000037364	AABR07003049.1	1:94988512-94988766	0.371167	0.395744	0.928037	0.954865	0.863579	1.011230	0.348208	0.786527	0.379762	1.016357	0.597419	0.594567
ENSRNOG00000053564	AABR07003049.2	1:95060810-95061421	0.119284	0.0	0.000000	0.0	0.200342	0.0	0.0	0.0	0.079979	0.0	0.000000	0.000000
XLOC_005789	XLOC_005789	1:94871355-94895877	6.722806	5.912911	6.286334	5.297357	8.192012	6.993449	5.929292	5.054832	7.402485	7.497182	6.656237	5.629627
XLOC_021243	XLOC_021243	1:94880140-94895877	0.354925	0.181159	0.212140	0.158555	0.200176	0.158198	0.301564	0.122790	0.241860	0.259737	0.283194	0.155090
XLOC_021269	XLOC_021269	1:95451127-95453984	0.136408	0.396255	0.324663	0.415423	0.289502	0.177600	0.070436	0.443009	0.000000	0.164113	0.295707	0.540859
ENSRNOG00000059987	AABR07003056.3	1:95452431-95456403	0.554352	0.429129	0.896479	1.043278	0.713485	1.139712	0.324183	0.800447	0.401834	0.878296	0.799002	0.335678
ENSRNOG00000037366	AABR07003056.1	1:95397991-95405285	0.000000	0.000000	0.000000	0.000000	0.000000	0.000000	0.000000	0.000000	0.000000	0.000000	0.000000	0.000000
XLOC_005871	XLOC_005871	1:95423869-95426496	0.080054	0.179849	0.017170	0.089365	0.043729	0.290231	0.060190	0.076927	0.201192	0.397236	0.132557	0.042143
ENSRNOG00000055248	AABR07003056.2	1:95423998-95443220	0.845908	0.759313	0.704435	0.763174	0.953751	0.724434	0.778953	0.619399	0.657255	0.688906	0.835235	0.628923
XLOC_021320	XLOC_021320	1:97498238-97510629	0.259160	0.147916	0.266689	0.325640	0.155695	0.398453	0.086205	0.274474	0.179933	0.201418	0.148303	0.169885
ENSRNOG00000017456	Vstm2b	1:97632473-97662650	17.507406	11.187250	15.889772	15.138654	11.593365	15.263839	15.760045	14.262301	15.985592	12.283260	10.881543	12.896787
ENSRNOG00000027112	MGC114499	1:97712177-97719005	0.027685	0.011446	0.083233	0.026175	0.049061	0.025142	0.046665	0.023945	0.067629	0.052320	0.026492	0.024548
ENSRNOG00000037360	AABR07003173.1	1:98045770-98046770	0.557763	0.581635	0.651635	0.282181	0.756094	0.617689	0.939155	0.234153	0.316912	0.338006	0.461723	0.648103
XLOC_021366	XLOC_021366	1:97916243-97948275	0.912632	0.771892	0.678774	0.705551	0.988092	1.204809	0.603043	0.844093	0.422822	0.959011	0.815229	0.579461
XLOC_005940	XLOC_005940	1:98048172-98074932	0.631105	0.537078	0.554431	0.428747	0.776751	0.628335	0.558033	0.550338	0.522395	0.774283	0.672868	0.554954
XLOC_005944	XLOC_005944	1:98052141-98052990	0.097168	0.241820	0.071664	0.183174	0.113693	0.226790	0.170028	0.137583	0.117634	0.411848	0.363148	0.156031
ENSRNOG00000032990	LOC690483	1:98425903-98438776	0.000000	0.000000	0.015650	0.034386	0.0	0.016487	0.007637	0.006349	0.007530	0.013747	0.044543	0.000000
ENSRNOG00000037331	Cd33	1:98398660-98405822	1.907683	3.199402	2.332855	1.861782	1.943650	1.776244	2.326531	1.123747	1.813305	1.568198	2.506577	2.954412
XLOC_005976	XLOC_005976	1:98168458-98207839	1.927636	1.870480	1.874984	1.775457	2.117399	1.533388	1.167366	1.839679	1.339334	1.828670	2.235647	1.836055
XLOC_021399	XLOC_021399	1:98168461-98200611	0.263789	0.166256	0.275942	0.092624	0.187572	0.062311	0.111142	0.145966	0.035065	0.188045	0.231852	0.086772
ENSRNOG00000014380	AABR07003176.1	1:98219593-98231855	5.310416	4.784813	7.678774	4.113938	5.772799	4.208764	6.142249	5.137654	4.129842	6.279052	6.601933	5.132248
ENSRNOG00000017918	Iglon5	1:98440186-98455920	8.406083	6.628955	6.476754	8.031151	9.052044	6.951952	7.464518	6.477998	7.150010	10.401735	6.294625	7.221964
ENSRNOG00000017749	Nkg7	1:98492828-98493978	0.084136	0.0	0.071454	0.0	0.037701	0.113483	0.035740	0.000000	0.000000	0.064114	0.0	0.037602
ENSRNOG00000037339	Siglec10	1:98512625-98521706	0.029838	0.110767	0.032352	0.011437	0.009650	0.018673	0.058479	0.0	0.0	0.018765	0.036696	0.022346
ENSRNOG00000017851	Etfb	1:98472745-98486976	17.442530	15.703800	15.273184	13.043758	15.512520	11.880906	13.108282	11.240030	9.750640	17.266644	14.073475	12.708933
ENSRNOG00000060684	AABR07003186.2	1:98472990-98473061	0.329329	0.024313	0.331955	0.174978	0.278326	0.392702	0.180758	0.496683	0.103130	0.489012	0.271554	0.269930
ENSRNOG00000021474	Siglec5	1:98562346-98570949	1.897112	0.646587	1.146668	0.849270	0.870333	1.833025	1.680564	1.422468	1.236153	1.950814	0.758210	0.895515
XLOC_006014	XLOC_006014	1:98592081-98598384	0.190035	0.163064	0.277123	0.105252	0.159342	0.262576	0.249881	0.220381	0.316978	0.368531	0.219414	0.200021
ENSRNOG00000037348	AABR07003187.1	1:98644050-98645156	0.578019	0.570606	0.445220	0.532516	0.516705	0.855404	0.673652	0.499197	0.872928	0.730736	0.522298	0.315417
ENSRNOG00000043280	Vom2r37	1:98863855-99146038	0.104070	0.485245	0.045453	0.084402	0.053435	0.068908	0.064076	0.020375	0.037651	0.000000	0.247208	0.036057
ENSRNOG00000049637	AABR07003233.1	1:99414961-99415040	0.087798	0.007723	0.035503	0.026492	0.067121	0.097547	0.030831	0.067995	0.087016	0.188283	0.039884	0.178062
ENSRNOG00000022640	AABR07003235.1	1:99578372-99587205	0.110281	0.019093	0.019674	0.024798	0.0	0.0	0.023155	0.193335	0.031997	0.180949	0.107833	0.004022
ENSRNOG00000023233	LOC102546648	1:99486253-99496209	3.994795	3.283450	4.509930	3.752962	4.050210	4.089677	3.862135	3.905280	3.765461	3.473468	4.031121	3.605388
ENSRNOG00000033729	LOC102556967	1:99505677-99512489	4.838592	3.675869	3.927406	4.507012	4.296342	4.279760	4.085952	4.603855	4.336468	6.137471	3.720775	3.192662
ENSRNOG00000030160	Zfp819	1:99532568-99539227	0.915123	0.961330	0.847181	0.746112	1.194445	0.979904	0.902131	0.892176	0.862612	1.031370	1.128569	0.582408
ENSRNOG00000022701	Ceacam18	1:99561523-99576304	0.568600	0.834313	0.548245	0.707539	0.611310	0.949020	0.523528	0.616918	0.336841	0.669183	0.653184	0.459178
ENSRNOG00000022353	Klk13	1:99648658-99660277	0.028794	0.0	0.0	0.0	0.0	0.032687	0.0	0.0	0.0	0.0	0.0	0.0
ENSRNOG00000030281	Klk10	1:99718907-99722284	0.000000	0.0	0.0	0.0	0.0	0.0	0.0	0.000000	0.000000	0.0	0.000000	0.0
ENSRNOG00000022313	Klk9	1:99729704-99733996	0.000000	0.0	0.0	0.0	0.0	0.0	0.0	0.000000	0.000000	0.0	0.000000	0.0
ENSRNOG00000018580	Klk8	1:99734993-99742009	0.019926	0.040910	0.065324	0.117902	0.000000	0.0	0.0	0.020645	0.083903	0.0	0.075716	0.0
ENSRNOG00000018334	Ctu1	1:99599620-99605412	3.557753	2.284407	3.504607	2.819621	3.462257	2.981558	3.272209	2.288729	3.028402	3.700112	2.174911	3.006482
ENSRNOG00000032170	AABR07003250.1	1:100204022-100205147	0.035245	0.0	0.000000	0.026546	0.0	0.039828	0.000000	0.060605	0.0	0.049875	0.0	0.0
ENSRNOG00000032857	Klk1c9	1:100059967-100203329	0.029505	0.0	0.000000	0.000000	0.0	0.0	0.0	0.0	0.000000	0.039500	0.0	0.0
ENSRNOG00000033414	Klk1c3	1:100161872-100163896	0.000000	0.0	0.000000	0.000000	0.0	0.0	0.0	0.0	0.000000	0.000000	0.0	0.0
ENSRNOG00000054979	LOC108348116	1:100164400-100165425	0.000000	0.0	0.000000	0.000000	0.0	0.0	0.0	0.0	0.000000	0.000000	0.0	0.0
ENSRNOG00000033805	Klk15	1:100189515-100196281	0.000000	0.0	0.000000	0.000000	0.0	0.0	0.0	0.0	0.000000	0.000000	0.0	0.0
ENSRNOG00000031927	Klk6	1:99762253-99769488	18.560659	9.985816	8.758859	4.928648	12.772557	11.557339	14.011773	2.939619	5.040593	7.862053	14.140722	15.249284
ENSRNOG00000057316	RF00604	1:100222088-100222178	1.734201	2.205459	0.435779	1.482774	1.728862	1.249050	1.057638	1.510370	1.067569	1.035555	1.833735	1.412479
ENSRNOG00000053819	RF00604	1:100224234-100224323	0.410693	0.621278	1.027720	0.168764	0.228812	0.236982	0.000000	0.140029	0.242929	1.512538	1.249148	0.319008
ENSRNOG00000019132	Fv1	1:100224401-100226725	16.336952	10.578594	15.159925	13.544032	13.511368	15.188058	14.506988	11.851791	11.412755	14.965492	11.356959	10.117883
ENSRNOG00000060695	RF00604	1:100224539-100224628	0.474898	0.350112	0.067139	0.330986	0.243574	0.586853	0.000000	0.850944	0.412521	0.723842	0.905180	0.543540
ENSRNOG00000054326	RF00604	1:100224872-100224962	0.476248	0.259133	0.481713	0.820313	0.680108	0.725816	0.519015	0.666409	0.247059	0.469672	1.292119	0.413793
ENSRNOG00000021659	Acp4	1:100227157-100234040	0.079311	0.036009	0.000000	0.049400	0.056288	0.062273	0.040529	0.013577	0.039785	0.060178	0.000000	0.000000
ENSRNOG00000019318	Syt3	1:100379186-100408083	14.576667	9.181205	11.799453	11.570421	10.819737	12.023730	13.059431	9.715433	11.519995	8.932273	9.570036	9.330215
ENSRNOG00000019138	Clec11a	1:100287401-100345355	13.149675	21.807650	22.098246	21.453375	14.699045	18.859316	16.659086	20.096102	26.816414	14.751101	20.961758	20.838774
ENSRNOG00000019207	Shank1	1:100297152-100344377	97.081543	147.411591	152.718857	159.350311	112.910744	133.591461	107.818703	134.757523	184.426804	106.965462	156.312469	152.323730
ENSRNOG00000062061	AABR07003250.2	1:100320372-100320853	1.018820	4.439643	1.543855	3.880358	2.870099	1.690371	0.972480	3.165733	2.067313	2.454316	4.476132	2.016988
XLOC_006120	XLOC_006120	1:100489859-100490371	0.098891	0.0	0.079391	0.087216	0.388734	0.000000	0.000000	0.0	0.114843	0.139469	0.401967	0.097884
ENSRNOG00000019442	Josd2	1:100473643-100477351	9.810967	12.027558	9.907027	7.210550	9.611895	9.868850	10.600228	7.001681	8.758897	9.220066	10.377379	11.225586
XLOC_021500	XLOC_021500	1:100427645-100436118	1.090763	2.491286	2.795500	3.132287	1.830072	2.737079	2.140671	3.171786	2.838557	1.295139	2.601320	2.612421
ENSRNOG00000019418	Lrrc4b	1:100447998-100468868	83.361595	60.424053	83.737190	71.406097	81.927887	77.337494	82.768082	59.116768	80.888351	73.345711	65.660088	66.696281
ENSRNOG00000019424	Aspdh	1:100470722-100473459	1.512421	1.192487	1.039771	1.289313	1.541939	1.388722	1.240334	1.139165	1.118895	1.634382	1.213474	1.438037
ENSRNOG00000019660	Spib	1:100531457-100537377	0.042620	0.000000	0.000000	0.000000	0.060531	0.005381	0.000000	0.020472	0.025346	0.0	0.015406	0.025059
ENSRNOG00000019681	Pold1	1:100537900-100554488	0.978761	0.638565	0.881412	0.622738	1.079967	0.894899	0.752736	0.532966	0.607169	0.935121	0.548939	0.711858
ENSRNOG00000031739	Fam71e1	1:100494718-100513925	2.014655	1.551137	1.941805	1.707365	1.943322	2.478681	1.983817	1.723319	2.419569	1.839287	2.234154	1.059055
ENSRNOG00000019532	Emc10	1:100495119-100501437	26.509493	24.419157	27.408068	22.798370	25.384666	23.625219	24.404530	22.000834	26.275599	22.865952	21.012424	22.499216
ENSRNOG00000019627	Mybpc2	1:100506704-100530183	0.329280	0.098665	0.046728	0.021888	0.361603	0.193798	0.367896	0.008530	0.028334	0.126436	0.020116	0.086205
ENSRNOG00000019812	Nr1h2	1:100554544-100559942	13.681216	10.850530	13.152267	10.856506	13.027169	12.091848	12.969796	9.333596	13.207891	12.618210	11.317507	12.308087
ENSRNOG00000019959	Kcnc3	1:100590032-100607874	12.648786	18.507221	17.473297	18.048630	15.092452	13.889359	15.254781	14.765067	17.939222	18.151808	21.399965	16.108288
ENSRNOG00000049382	AABR07071905.1	1:100675838-100676425	0.000000	0.000000	0.000000	0.000000	0.000000	0.000000	0.000000	0.000000	0.000000	0.000000	0.000000	0.000000
ENSRNOG00000050880	AABR07071905.2	1:100676091-100676170	0.087798	0.009654	0.054259	0.026492	0.056050	0.077755	0.015087	0.067995	0.087016	0.188283	0.039884	0.151835
ENSRNOG00000026572	Zfp473	1:100736243-100746021	0.396359	0.323285	0.353982	0.223754	0.279749	0.414928	0.383141	0.268259	0.424695	0.431696	0.329868	0.235215
ENSRNOG00000020014	Myh14	1:100608966-100671074	4.387095	4.254445	3.838791	2.152848	5.062884	4.224637	3.769941	1.637950	3.232486	6.284321	4.719903	3.638309
ENSRNOG00000026517	Vrk3	1:100755682-100783004	13.652353	11.157811	13.590178	12.726989	12.384034	12.317340	12.985671	10.312414	12.643573	11.727371	12.601283	12.250714
ENSRNOG00000020060	Atf5	1:100808241-100810522	24.892538	20.062784	22.761629	13.074512	33.626492	20.691130	21.342327	11.828723	22.585636	51.206310	20.193594	19.669611
ENSRNOG00000020148	Il4i1	1:100830064-100836677	0.201801	0.268887	0.313216	0.212824	0.491862	0.206692	0.278697	0.129795	0.157594	0.568589	0.413333	0.254063
ENSRNOG00000020191	Tbc1d17	1:100836990-100845392	13.705124	13.015567	14.971795	10.835267	14.626251	13.678529	15.841216	9.719041	12.735861	14.866623	12.886965	10.599917
ENSRNOG00000020289	Akt1s1	1:100845563-100851960	17.140373	15.580701	17.888487	15.404101	16.835775	17.196993	18.806982	13.559692	16.911674	16.496353	15.804061	16.024515
ENSRNOG00000020318	Pnkp	1:100853902-100859084	5.765357	5.067744	5.415280	4.261088	3.890304	5.915976	5.602222	4.786148	4.661676	5.668581	4.759427	3.734595
ENSRNOG00000020358	Ptov1	1:100859349-100865894	64.241806	40.497440	58.825188	49.743019	59.819427	54.271393	60.003632	40.787254	49.753468	58.614445	41.535488	46.543453
ENSRNOG00000020363	Med25	1:100874976-100887853	21.174059	17.773746	20.545099	17.347298	18.367256	17.860733	21.073933	15.618907	19.428625	17.159958	18.813717	16.906897
ENSRNOG00000053084	Fuz	1:100891866-100896807	10.217582	5.954788	9.433176	6.718826	8.456129	9.657939	10.225134	6.962443	6.830810	8.445673	7.300837	6.231776
ENSRNOG00000026243	Ap2a1	1:100896947-100926335	65.406425	54.039009	73.395012	73.622864	55.920776	60.151279	70.784607	64.797226	69.163734	58.474915	49.555492	55.748825
ENSRNOG00000020443	Tsks	1:100939740-100953975	0.141078	0.007762	0.033089	0.000000	0.049728	0.042792	0.114837	0.016683	0.092743	0.102289	0.053602	0.000000
ENSRNOG00000026163	Cpt1c	1:100955095-100969560	14.207531	11.985148	16.539394	13.711229	11.761174	14.292987	14.369883	13.274887	14.245409	10.575576	12.428672	10.661402
ENSRNOG00000026109	Prmt1	1:100971273-100980340	36.935516	23.317659	31.423521	24.711922	30.391714	27.124214	34.042267	22.385696	26.456366	34.496689	21.734795	21.528650
ENSRNOG00000020486	Bcl2l12	1:100984479-100995125	1.017613	1.053030	1.144591	1.010916	0.912163	1.151220	0.799800	1.060387	0.901236	1.554374	1.177675	1.392308
ENSRNOG00000043388	Irf3	1:100992213-100997198	4.888456	8.427094	5.296980	7.730850	5.962346	7.034155	3.165630	7.372441	6.693951	9.291828	8.924633	7.583974
ENSRNOG00000056946	Scaf1	1:100997745-101008266	50.502403	43.364891	51.929684	48.451702	45.936722	47.183784	50.356087	44.347141	50.611076	41.852947	44.745930	47.184616
ENSRNOG00000037247	Rras	1:101012822-101016720	4.909016	3.744903	3.388974	2.866585	3.942222	4.122604	3.790473	3.386543	4.096118	3.663882	4.063018	3.917498
ENSRNOG00000020634	Pih1d1	1:101137993-101158959	2.692303	2.525283	2.411775	2.319015	2.989978	1.993830	2.547432	2.026086	1.929039	2.642943	1.963977	1.926624
ENSRNOG00000020623	Aldh16a1	1:101138248-101151320	7.225235	5.179454	4.562991	5.309590	5.679489	5.746184	5.983257	4.784318	5.799882	6.265622	5.069077	4.816182
ENSRNOG00000059408	Prr12	1:101023106-101046208	16.034256	13.160995	15.065552	14.239895	16.746983	15.994383	15.382417	13.913511	13.456193	17.231281	15.551334	14.614530
ENSRNOG00000020517	Prrg2	1:101046563-101054851	1.068313	1.241562	1.023507	0.906440	1.147282	0.986339	0.948976	0.506044	1.460009	0.645594	1.020220	0.640381
ENSRNOG00000020543	Nosip	1:101055622-101072938	10.281049	10.642556	7.756966	8.272141	8.546380	8.934548	11.011656	8.962836	9.790843	9.833382	9.970071	7.538107
ENSRNOG00000043007	Rcn3	1:101076898-101086198	3.469030	2.227054	3.012250	2.093812	3.487719	2.919003	2.338665	2.157735	2.614421	4.234730	2.603733	2.981343
ENSRNOG00000020583	Fcgrt	1:101086877-101095594	11.740373	7.446998	10.045881	6.784448	12.760404	11.206269	9.749367	4.961573	10.732502	12.264399	8.666337	8.386016
ENSRNOG00000035560	Mir150	1:101115880-101119864	5.783835	3.696925	5.557267	2.193813	2.754123	3.798418	5.312067	2.632284	3.006474	3.747851	3.105247	2.942663
ENSRNOG00000020595	Rps11	1:101116635-101118825	160.058807	105.529602	171.145493	96.818672	141.285156	125.036766	154.280045	90.045219	108.435081	135.071014	102.740402	95.465286
ENSRNOG00000052300	RF00211	1:101117461-101117547	0.897806	1.645221	0.574081	0.596830	0.413592	1.410476	0.961497	0.794859	1.277867	1.451075	0.822465	0.865636
ENSRNOG00000020618	AC099450.1	1:101120325-101137218	10.603270	17.994017	30.563507	19.321133	29.450615	26.380621	25.673897	6.127365	11.410982	26.271517	12.050503	14.482730
ENSRNOG00000060031	RF00211	1:101121136-101121215	0.038229	0.030665	0.024470	0.047704	0.032469	0.029547	0.039727	0.056226	0.045851	0.041048	0.040063	0.056483
ENSRNOG00000060311	RF00147	1:101121383-101121449	0.094846	0.574613	0.115228	0.014487	0.407276	0.810584	0.002477	1.613787	0.012589	1.041153	0.003778	1.272036
ENSRNOG00000053764	RF00133	1:101121650-101121734	0.009092	0.786113	0.224089	0.836589	0.722134	0.009536	0.063435	0.009414	0.011041	0.841826	0.014319	0.011179
ENSRNOG00000055560	RF00133	1:101122173-101122255	0.004384	0.006348	0.005738	0.007422	0.007015	0.007316	0.006876	0.005679	0.019386	0.005954	0.006714	0.018860
ENSRNOG00000056212	Flt3lg	1:101124479-101131413	1.055846	0.705171	0.425747	0.681244	0.722265	0.463494	0.404562	0.556330	0.635059	0.877272	0.803586	0.510001
ENSRNOG00000020686	Dkkl1	1:101205426-101210675	0.000000	0.0	0.0	0.0	0.058077	0.0	0.0	0.0	0.0	0.0	0.0	0.029059
ENSRNOG00000025378	Ccdc155	1:101180657-101198801	0.295036	0.467406	0.157633	0.105114	0.252447	0.561185	0.348538	0.231487	0.215955	0.151550	0.183335	0.292199
ENSRNOG00000025220	Slc6a16	1:101249522-101261233	0.018951	0.0	0.006856	0.0	0.000000	0.017364	0.0	0.0	0.0	0.059844	0.0	0.0
ENSRNOG00000037219	RGD1562492	1:101265272-101277204	0.013683	0.000000	0.010089	0.006038	0.0	0.010646	0.0	0.030418	0.000000	0.0	0.009295	0.020166
ENSRNOG00000020695	Tead2	1:101213788-101230477	0.416605	0.302231	0.216795	0.495036	0.537117	0.636936	0.471739	0.270329	0.152880	0.797337	0.379252	0.456495
ENSRNOG00000020699	Cd37	1:101230533-101236065	1.439373	0.882122	1.242163	0.845267	1.303919	1.084897	1.530866	1.090465	1.534127	1.244892	1.493257	1.049554
ENSRNOG00000020714	Trpm4	1:101293409-101323960	0.684016	1.442930	1.093979	1.435758	0.592931	0.771242	0.762977	1.285996	1.335651	0.630053	1.383604	1.237258
ENSRNOG00000020650	Slc17a7	1:101161252-101173174	268.366028	281.673096	522.740540	555.485229	258.868927	379.101898	368.778168	468.026886	517.245911	257.741577	343.976349	415.622040
ENSRNOG00000020938	Ppp1r15a	1:101511901-101514974	5.539608	3.490559	5.306495	3.229894	5.674407	5.906019	5.381122	3.165164	2.632974	3.696558	4.217985	3.298685
ENSRNOG00000020949	Hsd17b14	1:101541266-101551059	0.522542	0.448428	0.260558	0.036175	0.336894	0.134235	0.339922	0.053696	0.354610	0.411480	0.533152	0.297643
ENSRNOG00000020942	Plekha4	1:101517714-101540802	0.508492	0.397906	0.621848	0.283449	1.006434	0.626075	0.538847	0.297595	0.596965	1.687480	0.534647	0.361242
ENSRNOG00000020990	Fgf21	1:101595579-101596822	0.204343	0.147810	0.055783	0.000000	0.164853	0.054114	0.000000	0.021369	0.040181	0.095342	0.000000	0.090877
ENSRNOG00000020995	Fut1	1:101599018-101602436	0.010993	0.113541	0.047302	0.051964	0.048863	0.024957	0.046321	0.047380	0.022649	0.020774	0.044943	0.060553
ENSRNOG00000020956	Bcat2	1:101554642-101572080	4.982692	3.178052	3.946180	2.700403	5.033761	3.855300	4.449297	2.374569	3.963871	4.596834	2.590921	2.768339
ENSRNOG00000024580	Mamstr	1:101623308-101627609	1.295071	1.330302	1.249097	0.962361	0.729716	1.567369	1.434556	0.526587	1.382518	0.712927	1.438790	1.044626
ENSRNOG00000021011	Fut2	1:101631635-101651668	0.260472	0.160093	0.335004	0.106299	0.227070	0.335390	0.304423	0.124190	0.295359	0.191512	0.293758	0.253787
ENSRNOG00000021014	Sec1	1:101663205-101664436	0.387114	0.615589	0.433758	0.426624	0.344997	0.447802	0.367603	0.429372	0.464756	0.175140	0.440614	0.292467
ENSRNOG00000024678	Izumo1	1:101603222-101608976	0.000000	0.056942	0.021407	0.000000	0.022488	0.018528	0.020403	0.063520	0.000000	0.084837	0.000000	0.123861
ENSRNOG00000021004	Rasip1	1:101610773-101621646	5.711547	4.816081	5.154253	5.194170	4.563550	4.625297	3.852068	4.129656	4.844835	5.184602	5.427832	4.981538
ENSRNOG00000021017	Car11	1:101682172-101687293	58.538021	47.287704	57.234081	47.856396	49.382652	58.196243	60.350620	41.011749	59.292866	39.662285	53.454475	39.705830
ENSRNOG00000020719	Hrc	1:101324652-101328435	0.238185	0.184924	0.138902	0.207206	0.068028	0.160044	0.141468	0.215830	0.210344	0.248897	0.246613	0.203163
ENSRNOG00000020731	Ppfia3	1:101327998-101351879	26.807249	34.946686	35.279102	36.605938	23.338917	27.777222	31.511919	32.842396	38.366913	18.659544	35.790100	36.269520
ENSRNOG00000020763	Snrnp70	1:101340354-101388129	23.627296	31.881178	23.684523	23.622278	29.919140	25.965319	22.914150	27.237051	19.375738	27.949894	30.923143	25.645784
ENSRNOG00000020746	Lin7b	1:101358396-101360971	35.163433	33.725193	39.196129	45.232758	26.511877	30.998486	36.798325	41.303932	36.652248	24.332445	32.692543	36.123280
ENSRNOG00000020779	Kcna7	1:101397828-101403320	0.033284	0.017201	0.080563	0.029501	0.018494	0.075441	0.026298	0.053722	0.047116	0.015725	0.011340	0.018445
ENSRNOG00000020783	Ntf4	1:101405314-101408145	0.129612	0.094945	0.163295	0.130972	0.099527	0.194809	0.094983	0.136030	0.200486	0.031470	0.000000	0.119138
ENSRNOG00000047040	Lhb	1:101410003-101426951	1.310461	0.965607	0.847127	0.650038	1.006657	1.245362	0.954351	0.494627	0.560921	0.854755	0.750109	0.799890
ENSRNOG00000020793	Ruvbl2	1:101413766-101426852	10.710726	9.252654	10.756783	9.623484	10.914457	10.861288	11.349942	8.396071	9.519873	11.429594	9.348362	9.487346
ENSRNOG00000020812	Gys1	1:101427195-101447092	6.377846	5.133480	5.973246	4.358737	5.991449	5.885529	6.314974	4.334085	5.897427	5.883312	5.897249	4.905852
ENSRNOG00000036301	AC128792.1	1:101448331-101448436	0.006015	0.006142	0.006388	0.006604	0.006505	0.006019	0.006240	0.006881	0.006022	0.005444	0.007618	0.006897
ENSRNOG00000020843	Ftl1	1:101448331-101450081	211.678070	143.444855	207.549072	136.412918	211.077789	218.597885	210.098328	92.052696	168.857040	185.914917	164.042480	150.236694
ENSRNOG00000057558	AC128792.2	1:101449902-101450071	7.404974	4.648786	7.692410	3.493707	4.846725	5.108541	5.921512	2.343899	4.054890	5.041084	4.982145	3.989781
ENSRNOG00000020876	Bax	1:101451802-101457207	12.309861	11.614102	11.447775	12.633784	12.787959	11.181324	13.019261	13.097669	12.049282	14.950240	12.447488	11.844658
ENSRNOG00000020883	Dhdh	1:101466677-101477099	3.076138	3.328701	2.295077	2.336503	2.845730	3.159313	2.926987	2.704139	2.632192	3.234838	2.924443	2.655305
ENSRNOG00000020927	Tulp2	1:101472057-101511412	0.748282	0.409972	0.856659	0.430912	0.492807	0.489367	0.629315	0.802296	0.336820	0.360217	0.626991	0.838120
ENSRNOG00000020889	Nucb1	1:101480145-101500850	82.275940	63.597713	77.199028	65.067184	65.135117	64.971687	79.534821	57.277699	73.265373	58.396385	59.512611	60.502937
ENSRNOG00000021032	Sphk2	1:101687673-101700731	13.060747	9.554074	11.812580	9.726049	12.776472	10.623880	10.507478	8.758508	10.800939	11.090962	9.924598	9.452005
ENSRNOG00000021027	Dbp	1:101687855-101692846	45.752014	39.627888	45.496765	39.431831	40.698166	46.092747	44.498741	37.154316	59.646328	36.335129	57.014999	48.800262
ENSRNOG00000021035	Rpl18	1:101701975-101703550	95.407219	56.775646	79.795265	50.624569	77.713654	69.193657	86.520164	43.722324	58.957893	79.300392	53.997921	47.837757
ENSRNOG00000021039	Fam83e	1:101704746-101711379	0.037276	0.000000	0.000000	0.084543	0.046603	0.069318	0.000000	0.009437	0.000000	0.013818	0.029846	0.022065
ENSRNOG00000021037	Spaca4	1:101707613-101708286	0.000000	0.000000	0.000000	0.000000	0.000000	0.000000	0.059797	0.000000	0.091807	0.000000	0.000000	0.000000
ENSRNOG00000021046	Sult2b1	1:101710959-101773508	1.237552	1.216238	1.475451	1.186077	0.835707	1.011545	1.182699	1.102150	1.233888	0.887225	1.236953	1.301166
ENSRNOG00000021048	AC095693.1	1:101783621-101792496	47.278309	44.847519	52.622452	52.716915	49.170807	52.381275	49.724472	48.570656	49.891109	42.462509	48.260620	45.622608
ENSRNOG00000021051	Cyth2	1:101796349-101803200	26.450726	26.093584	34.702255	25.211824	26.990637	28.548759	27.641911	23.426922	29.889633	26.604603	23.545406	20.897360
ENSRNOG00000021109	Ccdc114	1:101906903-101932998	0.457899	0.419205	0.427985	0.286785	0.564860	0.710368	0.649312	0.188390	0.240106	0.410185	0.703404	0.192930
ENSRNOG00000021056	Kcnj14	1:101805531-101809544	1.880793	2.014658	2.071261	2.217856	3.099096	2.186660	2.025747	1.799136	2.302462	3.029185	2.052426	2.778690
ENSRNOG00000021058	Grwd1	1:101813684-101819478	5.118422	4.606793	5.252664	5.435826	5.243816	4.646456	5.049724	4.986854	4.843894	5.893029	4.512627	4.634753
ENSRNOG00000021063	Grin2d	1:101820461-101857352	4.510082	2.424209	2.937562	2.908172	3.335077	2.467165	3.767328	2.934681	2.907564	4.624957	2.826177	2.642884
ENSRNOG00000021082	Kdelr1	1:101859346-101870232	37.951485	23.251053	32.761086	27.390505	31.160194	33.900074	33.587566	25.294365	30.622984	27.928741	22.630983	25.226191
ENSRNOG00000028781	Abcc6	1:101959540-102013243	0.379551	0.412782	0.253994	0.383379	0.373931	0.458617	0.290041	0.252453	0.411802	0.433689	0.427518	0.369050
ENSRNOG00000021093	Syngr4	1:101872543-101900332	0.520830	0.549366	0.611803	0.451064	0.453637	0.588568	0.547134	0.495329	0.517118	0.462104	0.520008	0.544028
ENSRNOG00000021096	Tmem143	1:101884019-101900070	5.500124	5.093200	6.149601	6.083268	5.514478	6.009206	6.530010	5.684158	6.298415	4.797459	5.043023	5.359767
ENSRNOG00000021104	Emp3	1:101900733-101903910	3.134964	1.688410	2.015729	1.709279	2.376050	2.467912	2.037076	0.795521	3.144413	3.686558	1.418860	1.673427
ENSRNOG00000021118	Nomo1	1:102017263-102068870	37.052090	31.249594	41.457302	37.771317	35.496151	36.266457	39.706989	31.911983	39.820824	32.643326	29.211292	31.872286
ENSRNOG00000021149	Ush1c	1:102207096-102255459	0.088346	0.0	0.000000	0.064577	0.075478	0.0	0.099830	0.000000	0.043251	0.108267	0.000000	0.011841
ENSRNOG00000050026	AC128786.1	1:102284292-102284499	0.000000	0.000000	0.000000	0.000000	0.000000	0.000000	0.000000	0.000000	0.000000	0.000000	0.000000	0.000000
ENSRNOG00000021130	Abcc8	1:102110708-102191287	3.889946	6.431417	5.125687	6.591657	3.622820	4.384737	4.667682	5.901479	6.090611	3.904355	5.717913	5.344398
XLOC_021652	XLOC_021652	1:102403734-102408357	0.254751	0.337635	0.322048	0.360313	0.709303	0.435396	0.156750	0.624246	0.535986	0.292026	0.372133	0.449903
ENSRNOG00000055401	Kcnc1	1:102414625-102456411	29.225431	31.127922	27.140446	33.232719	31.011003	24.545120	27.813013	32.573246	33.062630	37.784927	31.590628	33.603516
XLOC_006252	XLOC_006252	1:102764959-102770237	0.228326	0.299725	0.236326	0.183310	0.185539	0.261103	0.398121	0.116396	0.213228	0.161007	0.394325	0.376293
ENSRNOG00000011488	Sergef	1:102461329-102664951	11.608915	15.515590	16.555294	18.074915	13.802932	11.365434	15.325898	13.558719	12.929479	7.929241	16.674782	13.188498
ENSRNOG00000011672	Tph1	1:102669868-102699442	0.015339	0.031629	0.020572	0.063237	0.059662	0.000000	0.020119	0.0	0.031307	0.050731	0.020905	0.034003
ENSRNOG00000011895	LOC691143	1:102716649-102741581	1.542388	1.264441	1.122765	1.225204	1.850953	1.339196	1.526833	0.965214	1.081745	1.781557	1.387541	1.348411
ENSRNOG00000055531	Saa4	1:102776082-102849430	2.293249	2.209212	1.938562	1.820039	2.650386	2.294039	1.648873	2.259559	1.926643	2.474527	2.228497	2.432290
ENSRNOG00000012360	Gtf2h1	1:102849889-102877944	14.313194	11.062591	14.352575	14.017255	13.087142	12.881175	14.345220	12.610641	13.902995	13.410087	11.402073	12.261538
ENSRNOG00000013103	Ldhc	1:102915191-102931839	0.029476	0.037194	0.0	0.000000	0.027987	0.0	0.0	0.022239	0.039502	0.000000	0.000000	0.056774
ENSRNOG00000052397	AC099150.1	1:102924059-102931774	0.000000	0.000000	0.0	0.000000	0.000000	0.0	0.0	0.000000	0.000000	0.000000	0.000000	0.000000
ENSRNOG00000013009	Ldha	1:102900286-102909707	147.865494	129.718781	188.680038	190.763992	114.350945	142.663635	176.192307	180.507172	169.781952	125.465141	112.943405	129.623260
ENSRNOG00000013381	Tsg101	1:102941231-102970950	34.980526	26.552179	33.970490	28.694983	31.476240	29.463409	35.189312	28.099026	31.358486	30.658749	27.662600	24.576654
ENSRNOG00000013624	Uevld	1:102982123-103014388	1.400080	1.577789	1.300431	1.324551	1.793666	1.517923	1.216585	1.654946	1.090428	2.023363	1.625667	1.614260
ENSRNOG00000047591	Vom1r70	1:103061980-103139691	0.000000	0.000000	0.650844	0.000000	0.002505	0.607465	0.000000	0.000000	0.000000	0.000000	0.427114	0.000000
ENSRNOG00000050257	AABR07003273.1	1:103061980-103157537	0.699761	0.496035	0.029238	0.422183	0.518765	0.043866	0.507196	0.269157	0.512545	0.375501	0.018710	0.319582
ENSRNOG00000050806	Spty2d1	1:103115216-103128743	2.923331	2.512903	3.402536	2.124343	2.866386	3.451325	2.743634	1.991385	2.394476	2.645275	2.258779	2.224343
ENSRNOG00000013663	Tmem86a	1:103172987-103177417	3.599736	2.602730	3.784083	2.867939	4.128317	2.882534	3.678575	1.905434	2.954504	3.706238	3.279490	3.016556
ENSRNOG00000014227	Mrgprx3	1:103298174-103323476	0.293425	0.048081	0.249137	0.219174	0.131738	0.144783	0.195864	0.251809	0.167015	0.145772	0.155642	0.393322
XLOC_021699	XLOC_021699	1:103423379-103424306	0.000000	0.594869	0.826074	0.785347	0.985809	0.857930	0.767252	0.677099	0.517125	0.652970	1.006828	0.722175
XLOC_021708	XLOC_021708	1:103724025-103731757	0.138718	0.000000	0.0	0.0	0.0	0.632592	0.0	0.000000	0.0	0.000000	0.000000	0.125364
ENSRNOG00000028982	Mrgprb3	1:103863706-103943393	0.000000	0.113398	0.0	0.095498	0.071250	0.114346	0.051837	0.463887	0.052105	0.058736	0.185713	0.092985
ENSRNOG00000013981	Ptpn5	1:103197915-103256823	37.229919	26.237719	22.442200	22.866055	35.043221	32.569447	46.357536	21.716051	20.723701	17.574736	29.741880	25.519594
ENSRNOG00000058890	AABR07003274.1	1:103203719-103203774	0.284654	0.741047	0.191390	0.313278	2.154994	1.474315	0.000000	1.017517	0.600366	0.579978	2.034230	1.120032
ENSRNOG00000022537	E2f8	1:104187100-104202591	0.100916	0.046066	0.033674	0.013426	0.075073	0.070584	0.105387	0.024564	0.000000	0.038792	0.027961	0.053090
ENSRNOG00000014277	Zdhhc13	1:104106245-104145044	8.112247	7.813048	9.927468	8.864911	7.494156	8.109179	9.177153	8.874242	9.670035	7.889013	6.761420	8.402887
ENSRNOG00000058637	AABR07003304.2	1:104282029-104537126	0.989724	1.083372	0.483564	0.798862	1.346355	0.785886	0.126982	0.991498	0.734218	1.612553	1.013355	0.675608
XLOC_006370	XLOC_006370	1:104384745-104385320	0.000000	0.162068	0.041923	0.127299	0.195795	0.083653	0.455947	0.322554	0.075339	0.215401	0.239502	0.154883
ENSRNOG00000059104	RF00100	1:104408440-104566069	0.022121	0.736437	0.509117	0.606917	0.952245	0.799838	0.169839	1.167530	0.579695	1.553049	0.601786	0.640153
ENSRNOG00000053281	AABR07003304.1	1:104423818-104425447	0.000000	0.000000	0.000000	0.000000	0.000000	0.000000	0.000000	0.150252	0.000000	0.000000	0.000000	0.000000
XLOC_006417	XLOC_006417	1:104481997-104486829	0.036093	0.296046	0.124607	0.272732	0.374775	0.325974	0.026190	0.518453	0.172185	0.826463	0.332684	0.381763
XLOC_006421	XLOC_006421	1:104491846-104496716	0.019618	0.188949	0.042469	0.196383	0.360296	0.253594	0.027718	0.289079	0.132052	0.405921	0.303120	0.264179
XLOC_006431	XLOC_006431	1:104522581-104524129	0.000000	0.188944	0.032544	0.213477	0.329235	0.200894	0.021246	0.150068	0.138895	0.305889	0.221991	0.177074
XLOC_006450	XLOC_006450	1:104557665-104559830	0.012994	0.388307	0.151343	0.213979	0.325277	0.127335	0.014845	0.333902	0.159742	0.442566	0.444972	0.218144
ENSRNOG00000022189	Htatip2	1:105094411-105109461	2.806816	3.283011	4.020228	3.835375	2.793760	2.786769	3.661492	3.960490	3.870787	2.286070	3.582007	3.355496
ENSRNOG00000014530	Nav2	1:104576589-104941552	7.501956	8.280961	7.538814	8.403788	11.088285	10.117085	6.491261	7.898372	8.752282	14.301907	7.862829	8.087504
XLOC_021745	XLOC_021745	1:105238095-105248185	0.081264	0.474620	0.087114	0.480781	0.227700	0.283809	0.075561	0.632638	0.336579	0.230795	0.470850	0.474923
ENSRNOG00000031662	Slc6a5	1:105284753-105336363	0.729927	0.299031	0.531986	0.273475	0.467452	0.694960	0.676227	0.287147	0.393819	0.517063	0.241153	0.246131
ENSRNOG00000014829	Prmt3	1:105113595-105203402	10.505399	6.953057	11.189628	10.835307	11.182655	9.556013	10.276891	9.109371	10.063547	12.086979	7.094624	8.052757
ENSRNOG00000059537	RF00015	1:105178672-105178788	0.131136	0.573839	0.000000	1.053640	0.573448	0.135331	0.094192	0.277112	0.512126	0.068393	0.507133	0.000000
ENSRNOG00000052081	AABR07003354.1	1:107144545-107166382	0.000000	0.0	0.0	0.0	0.000000	0.0	0.000000	0.0	0.0	0.0	0.0	0.0
ENSRNOG00000015675	Nell1	1:105349069-106218958	22.504570	14.247949	17.476784	14.388841	16.392183	16.210478	17.457912	15.338649	15.038735	17.394657	14.458343	15.249716
ENSRNOG00000045720	LOC103690168	1:106405002-106406469	0.040630	0.108411	0.032854	0.129399	0.060310	0.123011	0.016206	0.397558	0.058427	0.301118	0.213069	0.094679
XLOC_021768	XLOC_021768	1:106829759-106850497	0.026768	0.081873	0.037327	0.046261	0.281086	0.130131	0.000000	0.115423	0.060916	0.253415	0.269872	0.219886
ENSRNOG00000055821	AABR07003349.1	1:106829759-106874959	0.609686	0.163792	0.000000	0.000000	0.235507	0.423147	0.397291	0.000000	0.171884	0.249902	0.023122	0.000000
ENSRNOG00000016147	Slc17a6	1:106998623-107038704	12.332645	3.148887	7.057026	2.760936	8.902028	7.771523	7.114245	2.550833	2.590872	12.093760	3.965987	3.213659
XLOC_006584	XLOC_006584	1:107535184-107560676	0.053487	0.121658	0.000000	0.072830	0.068027	0.0	0.000000	0.066628	0.127584	0.000000	0.123110	0.373171
XLOC_006587	XLOC_006587	1:107561486-107564090	0.000000	0.310932	0.000000	0.000000	0.000000	0.000000	0.503625	0.160232	0.000000	0.000000	0.000000	0.000000
XLOC_021882	XLOC_021882	1:110810211-110815030	0.000000	0.000000	0.0	0.000000	0.000000	0.000000	0.132346	0.0	0.0	0.071037	0.000000	0.412223
XLOC_006659	XLOC_006659	1:111103478-111115812	0.000000	0.000000	0.000000	0.000000	0.121226	0.311805	0.066183	0.597432	0.000000	0.000000	0.000000	0.433091
ENSRNOG00000016717	Gas2	1:107231078-107363890	1.045430	1.003375	1.149917	0.981739	2.022467	1.205834	0.892554	0.816523	1.149904	1.932591	0.666524	0.982696
ENSRNOG00000023968	Fancf	1:107231292-107232305	2.010068	1.324956	1.635577	1.165228	1.986870	1.410046	1.621649	1.714827	1.936795	2.383522	1.427800	1.255085
ENSRNOG00000037137	Svip	1:107254628-107373807	16.601902	8.651657	11.961802	8.728155	12.947851	9.315402	13.110927	2.875187	9.037218	9.670324	11.500119	9.606357
ENSRNOG00000049297	Ccdc179	1:107381357-107385257	0.000000	0.0	0.0	0.0	0.000000	0.0	0.000000	0.0	0.000000	0.000000	0.000000	0.0
XLOC_006538	XLOC_006538	1:107407962-107409546	0.000000	0.071987	0.0	0.189333	0.033993	0.019635	0.026562	0.242560	0.000000	0.261504	0.000000	0.0
XLOC_006546	XLOC_006546	1:107424281-107430660	0.000000	0.076089	0.0	0.000000	0.163619	0.0	0.000000	0.158653	0.0	0.000000	0.000000	0.0
XLOC_006709	XLOC_006709	1:113900317-113910104	0.000000	0.201253	0.0	0.287643	0.000000	0.0	0.000000	0.364896	0.0	0.000000	0.138348	0.655720
ENSRNOG00000056932	RF00100	1:114173100-114241362	0.184797	1.477688	0.136443	1.033026	1.094266	0.732960	0.316435	1.813115	1.071113	1.186988	1.578024	1.827711
ENSRNOG00000021484	AABR07003537.1	1:114174742-114175353	1.600494	1.151982	2.099694	0.684809	1.654199	1.972102	1.989713	1.393776	0.548175	2.956838	1.480568	1.457006
ENSRNOG00000011480	Tubgcp5	1:114186853-114222516	9.418343	8.980573	9.491761	7.752493	9.783415	9.190033	9.583791	8.658360	9.398673	9.854073	8.221118	7.859228
ENSRNOG00000062283	AABR07003492.2	1:112074735-112076013	0.067341	0.193689	0.172499	0.099975	0.099635	0.183309	0.034903	0.199166	0.097486	0.200648	0.125480	0.098770
ENSRNOG00000062222	AABR07003492.1	1:112085630-112086398	0.000000	0.080344	0.000000	0.000000	0.039593	0.000000	0.000000	0.049865	0.000000	0.000000	0.158907	0.000000
ENSRNOG00000062215	AABR07003495.1	1:112139502-112140291	0.000000	0.000000	0.000000	0.000000	0.000000	0.000000	0.000000	0.000000	0.000000	0.000000	0.000000	0.000000
ENSRNOG00000062187	AABR07003500.3	1:112829891-112947434	1.253440	1.074525	1.706557	1.632293	1.344880	1.107253	1.334429	1.370608	1.163831	1.348771	0.919543	1.103297
ENSRNOG00000010803	Gabra5	1:112833944-112947451	14.842648	10.547117	23.054245	19.240591	16.891678	18.219162	15.558044	16.464901	19.354589	19.942051	12.181613	11.938482
ENSRNOG00000046226	AABR07003500.2	1:112946563-112946656	1.562032	0.104322	0.125059	0.147088	1.864430	0.232747	0.183217	0.235482	0.135365	0.161242	0.142999	0.201272
ENSRNOG00000060599	Gabrb3	1:112976770-113265364	88.638901	66.051727	97.974770	101.716415	87.595291	79.982414	97.712921	87.201118	93.021805	93.546104	73.694710	62.751720
ENSRNOG00000014898	AABR07003500.1	1:113023947-113024556	0.000000	0.025322	0.026355	0.000000	0.000000	0.000000	0.000000	0.000000	0.000000	0.000000	0.000000	0.000000
ENSRNOG00000028324	AABR07003504.1	1:113346441-113347422	0.000000	0.000000	0.000000	0.000000	0.000000	0.000000	0.000000	0.000000	0.000000	0.000000	0.000000	0.000000
ENSRNOG00000062246	AABR07003509.1	1:113419689-113531166	1.919627	1.113716	1.566437	1.049117	0.857244	0.923063	1.240688	0.845778	0.950702	0.929892	1.052961	1.075172
ENSRNOG00000062256	AABR07003510.2	1:113511273-113511817	0.000000	0.000000	0.000000	0.000000	0.000000	0.000000	0.000000	0.000000	0.000000	0.000000	0.000000	0.000000
ENSRNOG00000054320	RF00026	1:113511822-113511922	0.000000	0.000000	0.000000	0.000000	0.000000	0.000000	0.000000	0.000000	0.000000	0.000000	0.000000	0.000000
ENSRNOG00000014465	Oca2	1:114679537-114987433	0.245301	0.070429	0.081675	0.105225	0.134413	0.123644	0.029399	0.047936	0.045784	0.154749	0.072492	0.016928
ENSRNOG00000058528	RF00560	1:115461270-115495954	0.056679	0.009373	0.081298	0.058120	0.314827	0.067636	0.039807	0.040784	0.0	0.594373	0.000000	0.073291
XLOC_021958	XLOC_021958	1:115153484-115163159	7.458782	3.641929	5.900619	5.661327	6.784232	7.419981	7.933131	5.984231	4.421034	5.309091	3.695305	4.572762
ENSRNOG00000056228	Atp10a	1:115975324-116141892	3.500697	3.554355	2.866932	2.514261	4.893935	4.089860	3.373757	2.212638	3.929032	2.984066	3.790204	3.170924
ENSRNOG00000053287	RF00026	1:114258019-114342607	1.433069	1.684839	1.218381	1.084869	1.486584	1.460356	1.039076	0.874745	1.098494	1.631068	1.386639	1.169589
ENSRNOG00000011945	Cyfip1	1:114258719-114347137	16.982420	14.368174	15.482746	14.543162	16.752083	16.537598	16.112717	12.529100	15.002622	18.959568	16.733049	14.747133
ENSRNOG00000012690	Nipa2	1:114343518-114371897	22.108835	17.157816	20.946297	20.033329	20.360641	19.827646	21.427580	18.608793	22.082031	19.097815	16.677233	17.192987
ENSRNOG00000042702	Nipa1	1:114386757-114422733	27.104668	22.766117	25.569738	23.694223	23.862064	23.428024	25.995668	24.133448	24.565304	20.001213	22.871296	26.297491
XLOC_021948	XLOC_021948	1:114446953-114452407	0.000000	0.022225	0.021979	0.000000	0.043754	0.000000	0.195054	0.019448	0.050829	0.000000	0.191325	0.164447
ENSRNOG00000013718	Herc2	1:114453054-114653793	31.670422	33.399456	34.598312	42.275215	33.064774	35.309032	32.987587	38.015610	36.531406	35.692371	32.834232	36.208973
XLOC_022076	XLOC_022076	1:116477464-116507579	0.140855	0.421904	0.072344	0.802720	0.256106	0.263197	0.065358	0.452407	0.108706	0.283307	0.604650	0.295248
XLOC_006785	XLOC_006785	1:116492218-116510958	0.000000	0.236682	0.000000	0.114808	0.142770	0.036760	0.077146	0.283621	0.000000	0.169754	0.274258	0.214870
XLOC_022083	XLOC_022083	1:116522922-116553074	0.119888	0.913491	0.101481	0.972242	0.329467	0.420676	0.109691	1.191015	0.282169	0.428895	1.227848	0.894089
ENSRNOG00000033844	LOC100912195	1:116565790-116567189	55.214165	28.874111	51.817860	32.359886	35.629974	37.596283	49.993893	33.432884	33.628334	36.330063	26.883936	26.994083
ENSRNOG00000058715	RF00105	1:116568034-116705577	0.864724	2.321638	0.904845	2.727826	1.927117	2.028624	0.929699	3.111835	2.352186	2.456452	2.866928	2.284715
ENSRNOG00000061338	RF00105	1:116670705-116699159	0.368796	2.032146	0.205323	1.183066	1.584598	1.423266	0.265978	2.523115	0.809910	1.727700	2.282727	2.242071
ENSRNOG00000057912	RF00105	1:116703694-116711797	0.166453	0.081046	0.185531	0.461327	0.449254	0.370627	0.223436	0.388997	0.084648	0.394106	0.320865	0.804500
ENSRNOG00000047696	AABR07003610.1	1:116705484-116988584	0.013442	0.877592	0.097557	0.034907	0.127636	1.095376	0.120928	0.489646	0.134546	0.450206	0.664490	0.537276
ENSRNOG00000061412	RF00105	1:116705501-116705577	0.000359	0.000180	0.000124	0.000385	0.000133	0.000515	0.000407	0.000136	0.000042	0.000163	0.000251	0.000103
ENSRNOG00000053039	RF00105	1:116707301-116707378	0.462381	2.517588	0.000000	1.924629	0.867270	1.661672	0.871946	2.752243	1.582654	1.342118	2.724243	1.645060
ENSRNOG00000053838	RF00105	1:116710475-116710552	0.725503	3.524888	0.430087	3.274135	2.625940	3.278395	0.197802	5.424391	2.791129	4.545338	5.023747	5.488725
ENSRNOG00000054743	RF00105	1:116711046-116711123	0.786813	2.643006	0.300923	1.037036	1.266129	0.930884	0.153398	2.808862	0.637292	2.108525	2.833909	2.905046
ENSRNOG00000055060	RF00105	1:116719910-116719987	0.000000	0.000000	0.000000	0.716013	0.000000	0.000000	0.000000	0.000000	0.000000	0.000000	0.000000	0.000000
ENSRNOG00000059496	RF00105	1:116721744-116721821	0.277173	0.339179	0.046719	0.413607	0.027638	0.316095	0.000000	0.415667	0.450544	0.311391	0.442370	0.132581
ENSRNOG00000052722	RF00105	1:116723444-116723522	0.163316	1.138257	0.148331	1.397380	1.019445	0.443206	0.173156	1.231672	1.021403	0.718970	0.987964	2.344450
ENSRNOG00000056875	RF00105	1:116725284-116725361	0.039852	0.357215	0.035895	0.604516	0.420439	0.159543	0.078314	1.902500	0.134750	0.530853	0.218032	0.720612
ENSRNOG00000054792	RF00105	1:116729328-116729406	0.177188	1.585673	0.238325	1.563684	1.223941	0.554276	0.241355	1.873868	1.204710	0.910629	1.522363	2.715914
ENSRNOG00000061445	RF00105	1:116731168-116731245	0.112913	0.744759	0.142904	0.936955	0.752911	0.251716	0.072662	0.795752	0.304367	0.426291	0.551579	0.531742
ENSRNOG00000059473	RF00105	1:116742683-116742760	0.186485	2.525510	0.192371	2.593344	1.517367	1.953117	0.263737	3.815578	0.814465	2.563541	1.622361	3.954091
ENSRNOG00000061800	RF00105	1:116748029-116748106	0.013284	0.052807	0.000000	0.146876	0.163802	0.143838	0.025297	0.224958	0.048921	0.061313	0.125391	0.106745
ENSRNOG00000061343	RF00105	1:116753042-116753119	0.009386	0.051386	0.006528	0.000085	0.042157	0.060635	0.035562	0.054624	0.010624	0.005039	0.010775	0.006365
ENSRNOG00000060962	RF00105	1:116754875-116754952	0.000000	0.000000	0.000000	1.720845	0.000000	0.000000	0.000000	0.000000	0.000000	0.000000	0.000000	0.000000
ENSRNOG00000059327	RF00105	1:116758148-116758225	0.000000	0.000000	0.000000	1.074774	0.000000	0.000000	0.000000	0.000000	0.000000	0.000000	0.000000	0.000000
ENSRNOG00000053092	RF00105	1:116759979-116760053	0.000000	0.000000	0.000000	0.607157	0.000000	0.000000	0.000000	0.000000	0.000000	0.000000	0.000000	0.000000
ENSRNOG00000055440	RF00105	1:116761811-116761888	0.000000	0.000000	0.000000	0.399266	0.000000	0.000000	0.000000	0.000000	0.000000	0.000000	0.000000	0.000000
ENSRNOG00000059676	RF00105	1:116763646-116763723	0.140928	0.327405	0.077406	0.584811	0.639925	0.394877	0.160126	0.294834	0.156899	0.805029	0.888179	0.718711
ENSRNOG00000059934	RF00105	1:116765475-116765551	0.047227	0.131392	0.000000	0.483966	0.018851	0.015667	0.077173	0.415936	0.023785	0.420478	1.071521	0.269013
ENSRNOG00000058591	RF00105	1:116767415-116767492	0.079339	0.969344	0.129163	1.066094	0.553931	0.409618	0.223481	1.457943	0.303772	0.613126	0.798125	0.748087
ENSRNOG00000059524	RF00105	1:116767894-116783813	0.125284	1.147414	0.153307	0.913992	0.821505	0.533795	0.133633	1.803182	0.448348	1.207427	1.735316	1.586033
ENSRNOG00000057205	RF00105	1:116769821-116769900	0.018404	0.052062	0.022597	0.040488	0.046443	0.065687	0.008996	0.063333	0.018764	0.051479	0.094297	0.069659
ENSRNOG00000055724	RF00105	1:116771740-116771823	0.061548	0.082661	0.065194	0.084970	0.067862	0.073750	0.017877	0.090638	0.060807	0.062414	0.108855	0.095401
ENSRNOG00000058138	RF00105	1:116780277-116780353	0.022920	0.025002	0.000000	0.044174	0.033292	0.021919	0.006710	0.067996	0.015403	0.015622	0.061203	0.060398
ENSRNOG00000038697	AABR07003616.1	1:116918697-116919269	0.000000	0.000000	0.000000	0.000000	0.000000	0.000000	0.000000	0.000000	0.000000	0.000000	0.000000	0.000000
ENSRNOG00000060481	RF00105	1:116978530-116978607	0.000000	0.000000	0.000000	0.969108	0.000000	0.000000	0.000000	0.000000	0.000000	0.000000	0.000000	0.000000
ENSRNOG00000059309	RF00105	1:116980361-116980435	0.000000	0.000000	0.000000	0.880972	0.000000	0.000000	0.000000	0.000000	0.000000	0.000000	0.000000	0.000000
ENSRNOG00000061124	RF00105	1:116982193-116982270	0.000000	0.000000	0.000000	0.352471	0.000000	0.000000	0.000000	0.000000	0.000000	0.000000	0.000000	0.000000
ENSRNOG00000051593	RF00105	1:116982427-116995438	0.374397	1.333081	0.386181	2.834365	1.339916	1.313696	0.361679	3.169184	0.894601	2.172008	2.604552	2.664130
ENSRNOG00000054032	RF00105	1:116985867-116985943	0.033333	0.073219	0.000000	0.447267	0.092742	0.074493	0.267389	0.311136	0.030135	0.339276	0.912821	0.191691
ENSRNOG00000052558	RF00105	1:116987807-116987884	0.097713	1.167372	0.177943	1.347618	0.927714	0.620227	0.281229	1.553459	0.375500	0.833996	0.935643	0.925051
ENSRNOG00000053842	RF00105	1:116990667-116990746	0.018404	0.046043	0.024897	0.055643	0.041118	0.057986	0.012595	0.067002	0.011016	0.055079	0.085153	0.068292
ENSRNOG00000061430	RF00105	1:116992586-116992669	0.043579	0.081259	0.037810	0.074740	0.053028	0.062235	0.008330	0.081089	0.045095	0.055863	0.099910	0.085727
XLOC_022129	XLOC_022129	1:117019364-117043026	0.109266	1.762300	0.026301	1.402073	1.038949	0.961617	0.065186	2.845906	0.529537	1.404773	2.388396	2.193247
XLOC_006826	XLOC_006826	1:117027827-117032764	0.000000	0.322898	0.000000	0.000000	0.000000	0.000000	0.029988	0.000000	0.000000	0.101202	0.000000	0.000000
XLOC_022130	XLOC_022130	1:117047590-117057190	0.102998	0.667489	0.319410	0.781424	0.561630	0.273349	0.172790	1.308558	0.462987	0.733909	1.006995	0.952208
XLOC_022132	XLOC_022132	1:117060479-117142717	0.603298	5.441257	0.561327	5.235917	3.182369	3.235214	0.531395	9.304707	2.392049	4.670390	8.036250	7.747190
XLOC_022134	XLOC_022134	1:117107444-117115807	0.101442	0.735142	0.099825	0.892750	0.399991	0.445722	0.071884	1.554002	0.322791	0.679634	1.031686	1.166525
XLOC_006827	XLOC_006827	1:117117355-117125081	0.000000	0.072178	0.000000	0.047732	0.101403	0.079010	0.000000	0.000000	0.000000	0.119436	0.500598	0.000000
XLOC_006828	XLOC_006828	1:117119576-117127199	0.000000	0.141431	0.000000	0.160987	0.000000	0.036434	0.000000	0.295550	0.000000	0.000000	0.132215	0.000000
ENSRNOG00000059608	RF00108	1:117144621-117147500	11.751020	55.125961	10.717606	50.763058	28.036070	30.855423	9.764121	106.835556	25.076664	59.279888	83.300682	72.363197
XLOC_022138	XLOC_022138	1:117148879-117151750	0.077230	0.558707	0.084246	0.427321	0.278649	0.429670	0.105672	0.791364	0.258737	0.594466	0.870719	0.601060
ENSRNOG00000054073	AABR07003650.1	1:117175108-117180632	0.000000	0.006355	0.002186	0.014136	0.000751	0.000722	0.000000	0.003731	0.009238	0.003736	0.000000	0.002260
XLOC_022145	XLOC_022145	1:117212252-117271269	0.141165	0.699074	0.124361	1.114009	0.298195	0.226957	0.132298	0.448964	0.345580	0.390914	0.578206	0.404307
XLOC_006832	XLOC_006832	1:117274303-117544336	0.821162	1.150304	0.264517	1.390224	0.752588	0.926819	0.216227	2.512410	0.683386	1.001960	2.189099	1.556019
XLOC_006833	XLOC_006833	1:117287922-117297381	0.104566	0.884646	0.101046	0.594215	0.439325	0.441384	0.062132	1.656482	0.328743	0.485519	1.338318	1.003003
XLOC_022149	XLOC_022149	1:117311653-117316754	0.436469	0.282543	0.364085	0.253690	0.437451	0.669333	0.281138	0.280416	0.393578	0.312098	0.357437	0.194319
XLOC_006837	XLOC_006837	1:117311681-117586504	2.953707	6.481559	2.853106	6.428063	4.419506	5.513452	3.675381	7.834910	3.933997	3.383092	7.666131	6.779817
XLOC_006841	XLOC_006841	1:117334382-117437191	0.720874	1.430262	0.697814	1.420900	1.284908	1.003707	0.886764	2.870579	2.455137	1.329099	1.557737	1.757238
XLOC_006842	XLOC_006842	1:117381546-117384526	0.068735	0.404825	0.070946	0.694796	0.072788	0.267272	0.055543	0.651981	0.085352	0.284923	0.244567	0.477098
XLOC_006843	XLOC_006843	1:117387790-117393853	0.000000	0.061256	0.000000	0.000000	0.273098	0.011470	0.000000	0.120243	0.035474	0.000000	0.010496	0.329319
XLOC_006844	XLOC_006844	1:117404019-117404539	0.193168	0.346101	0.128666	0.470776	0.419671	0.310259	0.078220	1.291432	0.298885	0.154601	0.492427	0.377715
XLOC_022151	XLOC_022151	1:117448735-117591131	0.181408	1.287120	0.783625	2.441461	1.184428	0.904067	0.217557	1.567268	0.384490	1.031266	1.134614	1.000838
ENSRNOG00000053358	AABR07003699.1	1:117448735-117744611	1.136983	1.195490	1.254270	2.260933	1.082553	0.645377	0.695185	1.282970	0.918323	0.885815	1.086347	1.096845
XLOC_006848	XLOC_006848	1:117548753-117573263	0.040590	0.114289	0.665828	0.087216	0.020503	0.057211	0.015549	0.007207	0.000000	0.004881	0.232362	0.000000
XLOC_022163	XLOC_022163	1:117635410-117639748	0.026600	0.005499	0.000000	0.044683	0.000000	0.389804	0.000000	0.043869	0.021549	0.000000	0.095874	0.130260
XLOC_022165	XLOC_022165	1:117663086-117670670	0.389466	0.286258	0.307945	1.700810	0.360138	0.588033	0.440837	0.399703	0.134792	0.223691	0.484713	0.269657
XLOC_022166	XLOC_022166	1:117672223-117679162	0.044460	0.119242	0.012743	0.319284	0.074381	0.016051	0.010461	0.117916	0.025195	0.084942	0.094977	0.217974
ENSRNOG00000051601	AABR07003713.1	1:117752382-118196652	0.246521	1.449171	1.515221	2.790019	1.472689	0.726767	0.779530	2.409416	1.151800	1.492654	0.902060	2.095429
XLOC_022172	XLOC_022172	1:117769261-117775228	0.000000	0.576220	0.030232	0.891040	0.226871	0.238006	0.068658	0.871340	0.224997	0.445232	0.906524	0.847414
XLOC_022175	XLOC_022175	1:117775697-117790068	0.000000	0.292424	0.045781	0.591412	0.131540	0.182216	0.017742	0.420969	0.081564	0.185642	0.359552	0.209708
XLOC_022178	XLOC_022178	1:117779679-117791679	0.053794	0.468317	0.103251	0.458454	0.241933	0.270031	0.059675	0.702887	0.186905	0.419304	0.443036	0.470687
XLOC_022171	XLOC_022171	1:117864397-118203419	5.309768	3.389279	1.390851	6.614694	3.177422	4.092696	2.118689	5.594240	2.238562	3.024695	3.934281	4.323211
XLOC_022188	XLOC_022188	1:117897747-117904630	0.000000	0.171566	0.000000	1.478464	0.000000	0.549279	0.000000	0.226418	0.015652	0.025350	0.129346	0.072624
XLOC_022189	XLOC_022189	1:117899271-117905957	0.119630	0.360192	0.107333	0.356381	0.291545	0.377020	0.000000	0.826925	0.081248	0.229688	0.154464	0.525002
XLOC_022190	XLOC_022190	1:117899933-117908251	0.072877	0.545019	0.133870	0.894751	0.265117	0.398653	0.000000	1.720104	0.142745	0.438734	0.752676	0.580515
XLOC_006852	XLOC_006852	1:117901190-117907474	0.000000	0.000000	0.087977	0.342488	0.000000	0.085468	0.000000	0.000000	0.196855	0.000000	0.132681	0.000000
XLOC_022191	XLOC_022191	1:117902464-117909271	0.040081	0.204606	0.069461	0.530775	0.114769	0.195437	0.021079	0.523549	0.006041	0.308126	0.484877	0.229168
XLOC_006849	XLOC_006849	1:117926587-117963378	0.743077	0.249144	0.206840	0.315977	0.000000	0.234333	0.000000	0.453240	0.356670	0.022757	0.000000	0.295798
XLOC_022193	XLOC_022193	1:117928636-117930376	0.058928	0.612138	0.155086	1.521520	0.168474	0.344268	0.079432	0.938565	0.277437	0.746136	0.659609	0.559147
XLOC_022194	XLOC_022194	1:117929302-117930597	0.044022	0.279121	0.006924	1.695445	0.298388	0.059337	0.000000	1.111101	0.187473	0.212609	0.316930	0.272926
XLOC_022195	XLOC_022195	1:117934202-117938950	0.000000	0.224320	0.210331	0.246256	0.077968	0.353896	0.000000	0.972920	0.031970	0.251265	0.648925	0.208409
XLOC_022196	XLOC_022196	1:117934705-117940287	0.008326	0.180525	0.116084	0.316478	0.127277	0.172672	0.010225	0.857697	0.125096	0.478543	0.452914	0.718954
XLOC_022197	XLOC_022197	1:117946996-117952327	0.000000	0.280244	0.019594	0.273549	0.072668	0.421631	0.038803	0.414017	0.203909	0.177320	0.689057	0.152844
XLOC_022198	XLOC_022198	1:117947178-117952600	0.000000	0.586085	0.128845	0.392990	0.101228	0.054146	0.022225	0.771318	0.147998	0.308193	0.887647	0.390713
XLOC_022199	XLOC_022199	1:117947719-117952684	0.000000	0.732606	0.000000	0.000000	1.010444	0.272071	0.000000	0.873828	0.000000	0.515698	0.407786	0.663885
XLOC_022200	XLOC_022200	1:117948100-117955455	0.141972	1.137018	0.117310	1.052813	0.494396	0.784750	0.218919	1.039172	0.643456	0.671839	1.361999	0.478731
XLOC_022201	XLOC_022201	1:117951029-117956742	0.071608	0.912667	0.110219	0.545175	0.304068	0.682072	0.188448	1.521838	0.285851	0.572627	0.881976	0.785767
XLOC_022202	XLOC_022202	1:117957768-117961289	0.106886	0.491466	0.079751	0.792687	0.532146	0.494265	0.040060	0.778375	0.448266	0.469424	0.538888	0.320752
XLOC_006854	XLOC_006854	1:117980884-118187721	1.004015	2.970062	0.953390	7.345001	2.059990	1.973710	0.553014	6.505191	1.484231	3.851574	4.615672	4.736507
XLOC_006862	XLOC_006862	1:118093200-118108462	0.062070	0.546537	0.062911	1.157425	0.169582	0.290146	0.023556	0.718574	0.203941	0.312858	0.633684	0.503436
XLOC_006863	XLOC_006863	1:118097260-118099811	0.047898	0.075991	0.022851	0.672148	0.074282	0.067924	0.020686	0.174547	0.030817	0.021834	0.173384	0.199773
XLOC_022208	XLOC_022208	1:118097324-118098761	0.000000	0.000000	0.000000	0.422437	0.000000	0.000000	0.000000	0.000000	0.073929	0.000000	0.000000	0.135080
XLOC_006865	XLOC_006865	1:118107349-118109395	0.000000	0.031141	0.000000	1.277307	0.000000	0.000000	0.047823	0.052337	0.000000	0.000000	0.090472	0.048645
XLOC_006867	XLOC_006867	1:118120518-118127872	0.000000	0.117371	0.000000	0.333521	0.011306	0.089642	0.037459	0.160508	0.135133	0.322729	0.506027	0.228107
XLOC_006875	XLOC_006875	1:118152150-118157915	0.033773	0.344702	0.000000	0.164932	0.048542	0.257932	0.108218	0.235390	0.056973	0.197590	0.251878	0.234681
XLOC_006878	XLOC_006878	1:118162269-118164275	0.020247	0.000000	0.000000	0.160686	0.000000	0.103347	0.000000	0.261295	0.048563	0.419536	0.059598	0.050452
XLOC_006922	XLOC_006922	1:119604174-119639504	0.000000	0.000000	0.000000	0.000000	0.000000	0.000000	0.140048	0.000000	0.000000	0.256385	0.000000	0.0
XLOC_022316	XLOC_022316	1:119616541-119639537	0.000000	0.000000	0.000000	0.000000	0.050022	0.167263	0.126137	0.000000	0.000000	0.591503	0.122690	0.0
XLOC_022320	XLOC_022320	1:119696400-119833943	0.150960	0.218949	0.213644	0.000000	0.000000	0.205347	0.147468	0.0	0.217225	0.281486	0.129385	0.083878
XLOC_022365	XLOC_022365	1:120288777-120289925	0.000000	0.119882	0.000000	0.000000	0.000000	0.000000	0.000000	0.330989	0.048442	0.000000	0.000000	0.000000
XLOC_022351	XLOC_022351	1:120227349-120230657	0.658535	0.279432	0.360945	0.288620	0.692717	0.391992	0.266483	0.545254	0.458301	0.365424	0.309864	0.483800
XLOC_022372	XLOC_022372	1:120330736-120350348	0.036782	0.399139	0.096859	0.368400	0.244413	0.094371	0.000000	0.675825	0.169698	0.327916	0.451770	0.691271
XLOC_022213	XLOC_022213	1:118204262-118207243	0.026102	0.382257	0.129588	0.798405	0.146753	0.215620	0.000000	0.744770	0.147458	0.340884	0.362630	0.396360
XLOC_022219	XLOC_022219	1:118232625-118234966	0.000000	0.000000	0.000000	0.269954	0.469332	0.546798	0.314324	0.401746	0.356775	0.000000	0.456871	0.077596
XLOC_022222	XLOC_022222	1:118245817-118251827	0.153571	0.250469	0.055799	0.229435	0.352054	0.435364	0.062617	0.391537	0.008395	0.312397	0.286843	0.277632
XLOC_022223	XLOC_022223	1:118250245-118255104	0.057103	0.237661	0.040782	0.336650	0.297706	0.272070	0.059258	0.464131	0.139287	0.287560	0.385550	0.361074
ENSRNOG00000051576	AABR07003786.1	1:118281985-118393540	0.093508	0.239597	0.169608	2.431793	0.077620	0.206606	0.167027	0.253215	0.101967	0.913720	0.393986	0.249662
XLOC_022231	XLOC_022231	1:118324685-118491371	1.647517	3.777303	1.492402	4.651637	2.611871	4.393679	1.452948	6.461981	2.471772	2.777088	6.468727	4.584322
XLOC_006882	XLOC_006882	1:118327147-118368442	0.000000	0.520681	0.038471	0.603552	0.511311	0.283220	0.000000	0.346376	0.119276	0.154292	0.542945	0.303571
XLOC_006883	XLOC_006883	1:118328274-118369078	0.043317	0.327428	0.000000	0.255620	0.028561	0.201500	0.000000	0.438663	0.010164	0.040112	0.130661	0.087182
XLOC_006889	XLOC_006889	1:118350205-118352657	0.110353	0.440263	0.085530	0.850121	0.353065	0.247173	0.000000	0.544686	0.159380	0.298087	0.580246	0.522371
XLOC_022233	XLOC_022233	1:118355802-118426748	0.088520	0.679226	0.112111	0.862188	0.526800	0.555262	0.101018	1.089143	0.295373	0.384590	1.167064	0.730265
XLOC_022235	XLOC_022235	1:118395704-118592729	0.894457	4.757197	1.423815	5.445817	2.229277	2.880961	0.634836	5.839755	2.133768	2.507308	6.077797	4.533447
XLOC_006897	XLOC_006897	1:118399297-118403631	0.154488	0.886836	0.194306	0.647145	0.595821	0.548289	0.172479	1.119618	0.390660	0.487461	1.285876	0.717227
XLOC_022239	XLOC_022239	1:118458619-118460902	0.292687	1.218782	0.187734	0.968459	0.552462	0.886541	0.153320	1.613225	0.464815	0.489460	1.663799	1.079667
XLOC_006898	XLOC_006898	1:118458701-118459750	0.036243	0.528353	0.000000	0.275472	0.133091	0.417682	0.000000	0.460786	0.284292	0.199411	0.503749	0.751871
XLOC_022247	XLOC_022247	1:118519549-118521059	0.015186	0.322976	0.005348	0.339565	0.107471	0.065632	0.000000	0.438865	0.087922	0.064348	0.317308	0.262931
XLOC_022254	XLOC_022254	1:118555942-118558875	0.031208	0.307380	0.056016	0.651848	0.228650	0.096712	0.000000	0.557000	0.166810	0.264481	0.703888	0.433565
XLOC_022256	XLOC_022256	1:118610765-118655063	0.174829	0.248048	0.258230	1.358590	0.354792	0.243078	0.000000	0.049917	0.227476	0.175250	0.494745	0.184483
XLOC_022257	XLOC_022257	1:118621006-118629075	0.000000	0.043748	0.000000	0.010134	0.000000	0.017614	0.000000	0.401810	0.000000	0.000000	0.012242	0.000000
ENSRNOG00000055116	LOC108349637	1:118706333-118717705	0.137283	0.531564	0.155658	0.555228	0.420274	0.394934	0.109938	0.903985	0.361172	0.476094	0.722399	0.661852
ENSRNOG00000059762	AABR07003833.1	1:118826230-118826977	0.000000	0.000000	0.000000	0.000000	0.000000	0.000000	0.000000	0.000000	0.000000	0.000000	0.000000	0.000000
ENSRNOG00000053966	RF00560	1:118905004-118905136	0.000000	0.000000	0.000000	0.000000	0.000000	0.000000	0.000000	0.000000	0.000000	0.000000	0.000000	0.000000
ENSRNOG00000058164	RF00560	1:118962531-118962624	0.000000	0.000000	0.000000	0.000000	0.000000	0.000000	0.000000	0.000000	0.000000	0.000000	0.000000	0.000000
ENSRNOG00000057034	AABR07003841.1	1:118965928-119166895	0.318061	0.612124	0.457106	0.910140	0.604911	0.587744	0.291287	1.219396	0.655610	0.700352	1.311065	0.124193
XLOC_006902	XLOC_006902	1:118989435-118995297	0.000000	0.090513	0.000000	0.134288	0.000000	0.142131	0.000000	0.444337	0.000000	0.141669	0.000000	0.561168
XLOC_022266	XLOC_022266	1:118992271-118998915	0.035514	0.096856	0.026947	0.428634	0.290470	0.077647	0.011224	0.183637	0.041615	0.077613	0.077611	0.000000
XLOC_022267	XLOC_022267	1:118993364-118999621	0.046467	0.327481	0.012088	0.722364	0.097290	0.444671	0.028409	0.385999	0.142987	0.184116	0.379706	0.589577
XLOC_022268	XLOC_022268	1:119004137-119011132	0.000000	0.211640	0.000000	0.271049	0.045068	0.112807	0.080673	0.178809	0.258223	0.485530	0.179494	0.038177
XLOC_022263	XLOC_022263	1:119137467-119572624	9.120615	12.764361	10.051631	17.283283	10.061023	12.008163	9.452814	18.806353	8.474420	11.148175	13.378985	12.979611
XLOC_006904	XLOC_006904	1:119141733-119309094	0.727864	0.250345	0.442013	0.824189	0.000000	0.216647	0.496118	0.042382	0.477181	0.242184	0.237069	0.150453
XLOC_022270	XLOC_022270	1:119166958-119355461	0.300705	2.058069	0.322702	2.873281	1.391430	1.776450	0.263354	3.649347	1.179995	1.695250	2.655228	2.141042
XLOC_022271	XLOC_022271	1:119169547-119243419	0.358210	1.811493	0.394050	3.233513	1.663852	1.088484	0.245619	2.759467	0.797659	1.103907	1.454605	1.736289
XLOC_022272	XLOC_022272	1:119171152-119254119	0.093006	0.382442	0.135057	0.919931	0.420622	0.294676	0.000000	0.766765	0.188228	0.310993	0.579603	0.859310
XLOC_022273	XLOC_022273	1:119179890-119410024	0.000000	0.991067	0.071283	0.715405	0.248921	0.516317	0.046615	1.107183	0.304733	0.420742	0.930147	0.627233
XLOC_022274	XLOC_022274	1:119183415-119267490	0.099295	0.512352	0.059442	0.549003	0.268926	0.310549	0.295161	1.203180	0.174660	0.787670	0.759438	0.678649
XLOC_022275	XLOC_022275	1:119189318-119276438	0.093003	0.863776	0.114964	2.039764	0.381495	0.289516	0.059138	0.854093	0.255723	0.438213	0.716039	0.558400
XLOC_022276	XLOC_022276	1:119189555-119193853	0.000000	0.698027	0.101671	1.011327	0.482684	0.321339	0.000000	1.204710	0.252628	0.529871	1.096144	0.741555
XLOC_022277	XLOC_022277	1:119190692-119274128	0.141381	0.645184	0.112291	1.443895	0.423528	0.399022	0.138621	0.854991	0.220889	0.329655	0.901225	0.873814
XLOC_022278	XLOC_022278	1:119194612-119277673	0.000000	1.050538	0.001565	0.942071	0.230755	0.591082	0.100127	1.645463	0.247407	0.625089	1.003461	0.421888
XLOC_022281	XLOC_022281	1:119197705-119281210	0.142903	1.426087	0.094528	1.057600	0.844172	0.591661	0.185762	1.887342	0.619089	0.596225	1.414161	1.255950
XLOC_022282	XLOC_022282	1:119199759-119282920	0.017925	0.375433	0.057680	0.677708	0.127180	0.347188	0.001209	0.712728	0.184161	0.236795	0.521420	0.255353
XLOC_006913	XLOC_006913	1:119199814-119207849	0.052487	0.000000	0.000000	0.000000	0.000000	0.000000	0.000000	0.322711	0.000000	0.049528	0.000000	0.000000
XLOC_022283	XLOC_022283	1:119200356-119209733	0.165774	0.538281	0.052370	0.941072	0.326516	0.570064	0.114572	0.650648	0.234738	0.607962	1.011326	1.161624
XLOC_022284	XLOC_022284	1:119202892-119210861	0.045814	0.405260	0.091017	0.496764	0.317700	0.148730	0.113168	1.082311	0.239175	0.433011	0.348060	0.768282
XLOC_022285	XLOC_022285	1:119203472-119213163	0.032678	0.119168	0.016131	0.354373	0.142868	0.094921	0.009023	0.298043	0.087366	0.129267	0.678120	0.297126
XLOC_022286	XLOC_022286	1:119204706-119294275	0.034496	0.486346	0.039093	0.720205	0.337956	0.252596	0.019060	0.877536	0.247306	0.386052	0.658213	0.438653
XLOC_022287	XLOC_022287	1:119219832-119300950	0.203328	0.952097	0.132905	1.372529	0.509003	0.716846	0.131846	1.171032	0.307326	0.576534	1.160005	0.776941
XLOC_022288	XLOC_022288	1:119223042-119476943	0.423642	2.104227	0.374819	1.398214	0.988627	1.296042	0.389382	3.279775	0.648441	1.731542	2.451891	1.780721
XLOC_022289	XLOC_022289	1:119236026-119348694	0.048077	0.310022	0.000000	0.423970	0.236806	0.303679	0.035279	0.565724	0.123612	0.289188	0.366583	0.329703
XLOC_022290	XLOC_022290	1:119236719-119246750	0.494274	0.568296	0.160184	0.238987	0.135821	0.255902	0.164176	0.628604	0.128291	0.439904	0.448671	0.358137
XLOC_022291	XLOC_022291	1:119252978-119255835	0.372410	0.245321	0.068578	0.507329	0.217834	0.246011	0.023573	0.696016	0.108401	0.291108	0.209232	0.171324
XLOC_006915	XLOC_006915	1:119256264-119317202	0.149977	0.000000	0.284749	0.042906	0.080253	0.000000	0.000000	0.379283	0.000000	0.194689	0.000000	0.000000
XLOC_006916	XLOC_006916	1:119269854-119417196	0.054737	0.098097	0.000000	0.000000	0.000000	0.000000	0.022817	0.314628	0.000000	0.103177	0.000000	0.000000
XLOC_022292	XLOC_022292	1:119293581-119469164	0.062373	0.441871	0.041711	0.537083	0.241384	0.186036	0.009996	0.587715	0.232915	0.461708	0.611123	0.640168
XLOC_022293	XLOC_022293	1:119301056-119327539	0.000000	0.059506	0.000000	0.308542	0.103186	0.110656	0.000000	0.335519	0.052113	0.007819	0.069107	0.080832
XLOC_022294	XLOC_022294	1:119301717-119328676	0.006885	0.228791	0.000000	0.287698	0.049380	0.067722	0.014507	0.303284	0.059362	0.068510	0.147596	0.245009
XLOC_022295	XLOC_022295	1:119328795-119523199	0.374748	1.806342	0.365753	0.943726	0.910216	1.525245	0.249774	2.362671	0.702323	1.625480	2.095524	1.910638
XLOC_022296	XLOC_022296	1:119334949-119338559	0.000000	0.017778	0.000000	6.470082	0.047219	0.000000	0.000000	0.091860	0.048076	0.041551	0.101029	0.000000
XLOC_022297	XLOC_022297	1:119348779-119493301	0.056663	0.217657	0.042992	0.703847	0.000000	0.091054	0.021645	0.560886	0.116603	0.147553	0.241829	0.063840
XLOC_022298	XLOC_022298	1:119361101-119368335	0.028376	0.354375	0.060849	0.149570	0.110157	0.144397	0.130846	0.606038	0.064838	0.154363	0.279211	0.113139
XLOC_022299	XLOC_022299	1:119361533-119368461	0.000000	0.057766	0.072093	0.381315	0.074472	0.000000	0.063539	0.072454	0.020549	0.083226	0.348271	0.105078
XLOC_022300	XLOC_022300	1:119362674-119372089	0.012936	0.098851	0.017294	0.731733	0.025580	0.031402	0.009054	0.153713	0.026756	0.051253	0.094364	0.070923
XLOC_022301	XLOC_022301	1:119365895-119373193	0.011144	0.179283	0.020497	0.760182	0.062499	0.012651	0.015673	0.492145	0.043144	0.213724	0.220979	0.176930
XLOC_022302	XLOC_022302	1:119373757-119530227	0.085469	0.523270	0.021098	0.618671	0.235604	0.188945	0.107456	0.810997	0.157205	0.228694	0.464430	0.494677
XLOC_022303	XLOC_022303	1:119421020-119552909	0.145179	0.711303	0.118991	1.268519	0.515725	0.336424	0.058919	0.774038	0.275303	0.410059	0.731426	0.675061
XLOC_022304	XLOC_022304	1:119471693-119474768	0.256051	0.645981	0.042694	0.376905	0.363433	0.566569	0.166169	0.827103	0.000000	0.638947	0.601015	0.529538
XLOC_022305	XLOC_022305	1:119505289-119512354	0.185633	0.672123	0.239392	0.667464	0.426183	0.694626	0.169389	1.081721	0.360880	0.673013	0.900793	0.776745
XLOC_022384	XLOC_022384	1:120359619-120498488	0.000000	0.258713	0.073326	0.341412	0.000000	0.135408	0.000000	0.165072	0.017639	0.096610	0.219689	0.316419
XLOC_022385	XLOC_022385	1:120361165-120516845	0.030015	0.375121	0.076393	0.454077	0.070814	0.170143	0.023885	0.745276	0.125872	0.088067	0.394440	0.419178
XLOC_022387	XLOC_022387	1:120383476-120386718	0.000000	0.000000	0.000000	0.616065	0.000000	0.255441	0.000000	1.142040	0.000000	0.037011	0.628730	0.171320
XLOC_022391	XLOC_022391	1:120387118-120447914	0.196301	1.211305	0.316751	1.422467	0.425734	0.505873	0.309311	2.159703	0.640138	0.320426	1.723130	1.568822
XLOC_022396	XLOC_022396	1:120402672-120550549	0.030150	0.306967	0.089603	0.375504	0.057015	0.136384	0.040783	0.715279	0.112900	0.077606	0.440895	0.349253
XLOC_022397	XLOC_022397	1:120408839-120413485	0.074451	0.527511	0.103875	0.482309	0.107333	0.128103	0.083115	0.533008	0.057747	0.044150	0.481468	0.509666
XLOC_022399	XLOC_022399	1:120417754-120612669	0.061237	0.553758	0.088142	0.751204	0.167729	0.257757	0.047298	1.556223	0.181723	0.191673	0.817416	0.864804
XLOC_022411	XLOC_022411	1:120463426-120465903	0.217530	0.527379	0.197299	0.716574	0.377562	0.423330	0.269490	0.661621	0.372018	0.170460	0.379571	0.470551
XLOC_022413	XLOC_022413	1:120473198-120478438	0.037043	0.341146	0.063430	0.398945	0.112497	0.231777	0.034221	0.795401	0.115949	0.202630	0.727706	0.610756
XLOC_022420	XLOC_022420	1:120498998-120500414	0.000000	0.305624	0.020096	0.466737	0.080684	0.127055	0.018747	0.742809	0.068646	0.101475	0.300513	0.629341
XLOC_022423	XLOC_022423	1:120503125-120511603	0.042320	0.237541	0.064192	0.229601	0.016000	0.166184	0.026321	0.423105	0.078034	0.075488	0.342296	0.302229
XLOC_022424	XLOC_022424	1:120507333-120512741	0.000000	0.238894	0.073567	0.193679	0.315995	0.107120	0.029426	0.565748	0.196231	0.059709	0.102041	0.274437
XLOC_022425	XLOC_022425	1:120534534-120537779	0.028853	0.157152	0.000000	0.019823	0.000000	0.033365	0.000000	0.341914	0.030012	0.106846	0.485970	0.034045
XLOC_022448	XLOC_022448	1:120745213-120774392	0.046819	0.306919	0.059992	0.386264	0.121202	0.244712	0.032546	0.833090	0.190050	0.194691	0.664755	0.516102
XLOC_022449	XLOC_022449	1:120774466-121071039	6.882503	8.568702	6.294615	11.059106	5.621554	8.485609	5.964186	15.208919	7.519954	5.263689	11.639526	10.500019
XLOC_006942	XLOC_006942	1:120894089-121071040	1.158273	1.113339	1.549195	1.135874	0.821789	0.795701	1.520594	1.322742	1.972362	0.467334	0.969019	1.243462
XLOC_022453	XLOC_022453	1:120895974-120898132	0.197132	0.822120	0.097865	0.629836	0.306717	0.405383	0.070502	1.376753	0.258926	0.675158	1.021501	0.857399
XLOC_022454	XLOC_022454	1:120931464-120940737	0.094111	1.388098	0.164565	1.651294	0.642817	0.600251	0.066004	1.617272	0.445896	0.627461	1.172101	1.018033
XLOC_022455	XLOC_022455	1:120934039-120942836	0.052714	0.458026	0.077974	0.763239	0.240423	0.319337	0.013883	0.879079	0.050734	0.494865	0.497226	0.589082
XLOC_006955	XLOC_006955	1:120965833-120966864	0.124217	0.350620	0.111050	0.000000	0.095432	0.127482	0.128076	0.201808	0.367023	0.000000	0.000000	0.000000
XLOC_022456	XLOC_022456	1:121045748-121062099	0.079682	1.805376	0.206431	1.586897	0.445937	0.656433	0.097524	1.679304	0.942471	0.252733	1.858422	1.262209
ENSRNOG00000010853	Chrna7	1:123899657-124039196	11.912068	6.710276	11.318909	10.273112	9.287250	10.899170	9.902043	10.138206	9.561659	8.679874	6.731083	8.464115
ENSRNOG00000061295	AABR07004085.1	1:124059034-124076367	0.093120	0.598453	0.108479	0.398134	0.419685	0.473902	0.104817	0.599036	0.220298	1.010388	0.872322	0.720933
ENSRNOG00000056061	AABR07004090.1	1:124246428-124311586	0.848397	0.619966	0.495363	0.289829	0.635559	0.297219	0.991525	0.395651	0.500310	0.774135	0.519714	0.356959
XLOC_007170	XLOC_007170	1:124311867-124624717	0.884030	3.507820	0.341697	2.111666	1.276487	1.770193	0.690231	4.165126	1.884576	1.513880	3.637168	2.293580
XLOC_007171	XLOC_007171	1:124330677-124412272	0.187249	1.416704	0.240473	1.185732	0.766890	0.940468	0.124901	1.434891	0.592770	0.641087	1.685962	1.184587
XLOC_007172	XLOC_007172	1:124352729-124354904	0.258820	2.163137	0.120991	1.955240	0.846717	1.327972	0.214504	2.584894	1.102951	1.262479	2.508169	2.198698
XLOC_007173	XLOC_007173	1:124355201-124371275	0.218871	1.937430	0.216274	1.556486	1.094717	1.276365	0.167046	2.538667	0.819480	1.219090	2.458545	1.808287
XLOC_007174	XLOC_007174	1:124394693-124402412	0.180644	1.613984	0.245126	1.168219	0.867621	1.175690	0.160760	2.483331	0.729469	1.126836	1.940407	1.737197
ENSRNOG00000029078	Hmgn5b	1:124426007-124515768	1.931167	3.514698	2.069296	2.222067	2.669939	2.478572	1.835884	2.534353	1.970143	2.562704	3.581623	3.374835
ENSRNOG00000057334	RF00003	1:124480716-124480861	0.029684	0.041966	0.000000	0.000000	0.000000	0.000000	0.000000	0.000000	0.000000	0.023535	0.000000	0.000000
XLOC_022634	XLOC_022634	1:124623487-124624724	0.076826	0.340316	0.000000	0.000000	0.000000	0.000000	0.087061	0.194349	0.179910	0.000000	0.140991	0.000000
ENSRNOG00000015503	AABR07004100.1	1:124625985-124653820	14.202916	16.582569	18.328024	19.350103	14.527040	14.558166	17.800756	17.723446	18.695400	12.892400	16.013666	17.363150
ENSRNOG00000047759	rno-mir-344b-2	1:121185891-121185961	0.047710	0.000000	0.104159	0.029436	0.000000	0.042326	0.000000	0.037100	0.000000	0.000000	0.081466	0.036809
ENSRNOG00000047240	AABR07003935.5	1:121187458-121187555	0.342602	0.119786	0.000000	0.000000	0.041801	0.050779	0.139228	0.078207	0.103130	0.297794	0.143914	0.000000
ENSRNOG00000049100	Mir344b-1	1:121193138-121193235	0.074213	0.596830	0.000000	0.000000	0.186408	0.000000	0.000000	0.107714	0.093659	0.000000	0.142704	0.397758
ENSRNOG00000050352	AABR07003935.12	1:121198949-121199015	0.000000	0.130639	0.000000	0.314565	0.000000	0.177243	0.000000	0.000000	0.000000	0.094141	0.135777	0.110426
ENSRNOG00000049216	rno-mir-344b-2	1:121201252-121201322	0.000000	0.263962	0.000000	0.072967	0.221431	0.187966	0.000000	0.244254	0.000000	0.000000	0.109004	0.135310
ENSRNOG00000046102	AABR07003935.2	1:121202861-121202934	0.000000	0.102974	0.000000	0.230711	0.000000	0.000000	0.000000	0.618630	0.278731	0.139940	0.427514	0.099819
ENSRNOG00000048918	AABR07003935.8	1:121205751-121205848	0.097596	0.233268	0.000000	0.102123	0.194317	0.167339	0.078182	0.583637	0.000000	0.063401	0.196738	0.087890
ENSRNOG00000046092	AABR07003935.1	1:121210526-121210623	0.153510	0.915210	0.136707	0.245096	0.151386	0.610499	0.156364	0.683657	0.196789	0.229590	0.415644	0.358320
ENSRNOG00000047713	AABR07003935.6	1:121212098-121212196	0.012747	0.051695	0.000000	0.042964	0.046225	0.062033	0.020143	0.055390	0.036113	0.000476	0.056231	0.081301
ENSRNOG00000049058	AABR07003935.9	1:121213014-121213113	0.000000	0.019908	0.000000	0.000000	0.057129	0.002714	0.000000	0.077124	0.000000	0.040363	0.119314	0.066133
ENSRNOG00000050488	AABR07003935.14	1:121219346-121219442	0.071897	0.128329	0.000000	0.000600	0.000000	0.040517	0.029215	0.081913	0.021264	0.055016	0.000000	0.000000
ENSRNOG00000049262	AABR07003935.10	1:121225465-121225538	0.258497	0.347886	0.000000	0.442328	0.567042	0.000000	0.000000	0.331877	0.167238	0.134565	0.157795	0.550636
ENSRNOG00000046914	AABR07003935.4	1:121227091-121227164	0.092897	0.000000	0.007242	0.235484	0.215446	0.024454	0.000000	0.391557	0.112886	0.052159	0.231188	0.177577
ENSRNOG00000046737	AABR07003935.3	1:121240116-121240183	0.000000	0.126083	0.000000	0.001269	0.000000	0.000014	0.000000	0.001349	0.004206	0.000020	0.000617	0.000000
ENSRNOG00000048836	AABR07003935.7	1:121240116-121322233	0.470361	2.481970	0.631943	3.494573	2.039990	1.506285	0.523585	3.432802	0.364686	1.152311	3.112600	2.064383
XLOC_022487	XLOC_022487	1:121279323-121322233	3.358822	3.446517	2.208397	2.042639	1.816544	2.246798	2.488339	3.732759	3.410844	2.308429	3.737476	2.604342
XLOC_006980	XLOC_006980	1:121281848-121320194	0.869720	0.611385	0.787603	0.326832	0.350987	0.424062	0.942546	0.913821	0.568496	0.566169	0.562035	0.402550
XLOC_022493	XLOC_022493	1:121300118-121363544	0.202188	1.091254	0.142942	1.234973	0.540375	0.696225	0.216458	1.854180	0.491517	0.897968	1.538054	1.403823
XLOC_022495	XLOC_022495	1:121324682-121341936	0.162523	1.481131	0.133110	1.590736	0.656201	0.740476	0.171900	2.610307	0.678038	0.981351	1.839654	1.625821
XLOC_022496	XLOC_022496	1:121336119-121346201	0.157165	1.021337	0.116300	1.197125	0.489813	0.475424	0.130821	1.805914	0.350844	0.603633	1.301166	0.717140
ENSRNOG00000057110	AABR07003944.1	1:121351758-122075008	0.406184	3.413349	0.817181	1.958284	1.368997	2.809807	0.462594	5.495032	1.587937	1.202770	5.017201	3.772927
ENSRNOG00000060158	RF00108	1:121383346-121562688	0.044186	0.070087	0.010600	0.191489	0.089373	0.104158	0.019249	1.273849	0.515095	0.115034	0.434204	0.104398
ENSRNOG00000051822	RF00108	1:121387047-121395242	0.362848	1.655872	0.411966	2.248249	1.539245	1.910838	0.627435	6.256210	1.325069	2.141221	2.075500	4.438118
ENSRNOG00000057005	RF00108	1:121396033-121396125	0.050082	0.061273	0.033316	0.045015	0.045784	0.064393	0.000941	0.083914	0.044508	0.048375	0.090687	0.065773
XLOC_007017	XLOC_007017	1:121413320-121520400	0.368184	2.994083	0.185620	1.841057	1.509120	1.322939	0.160584	4.750644	1.019173	1.858526	3.902617	5.136207
ENSRNOG00000058831	RF00105	1:121458945-121562688	0.104187	0.992490	0.232795	1.053320	0.652580	0.768824	0.141490	1.310651	0.393355	0.915091	1.078281	2.161872
XLOC_007020	XLOC_007020	1:121474061-121487723	0.060705	0.560947	0.041947	0.463098	0.312226	0.386463	0.061008	0.874272	0.134806	0.375431	0.993500	0.695733
XLOC_022504	XLOC_022504	1:121490885-121494794	0.020250	0.000000	0.000000	0.032201	0.000000	0.000000	0.000000	0.013627	0.000000	0.262720	0.000000	0.000000
XLOC_007021	XLOC_007021	1:121536283-121543577	0.195724	0.791117	0.088598	0.591071	0.477127	0.547901	0.065955	1.225487	0.372599	0.602700	0.992745	1.199168
ENSRNOG00000052034	RF00105	1:121557171-121557247	0.075477	0.183548	0.000000	0.394895	0.331068	0.102816	0.021809	0.747473	0.104805	0.112481	0.436426	0.595510
ENSRNOG00000061649	RF00105	1:121562788-121575296	0.398715	1.763811	0.262785	2.664440	1.132548	1.097096	0.272432	2.590557	0.735812	1.533878	2.242866	2.324134
ENSRNOG00000060923	RF00105	1:121565491-121565574	0.037340	0.073161	0.033378	0.073414	0.048302	0.058523	0.007497	0.080243	0.040097	0.053818	0.094289	0.091890
ENSRNOG00000055495	RF00105	1:121567415-121567494	0.009743	0.057784	0.014865	0.044728	0.041778	0.055300	0.008349	0.069392	0.009668	0.058092	0.081014	0.068317
ENSRNOG00000057940	RF00105	1:121572218-121572294	0.064978	0.101637	0.000000	0.318056	0.092742	0.018867	0.075991	0.212981	0.032163	0.342129	0.556186	0.135881
ENSRNOG00000052930	RF00105	1:121577291-121577365	0.000000	0.000000	0.000000	0.103628	0.000000	0.000000	0.000000	0.000000	0.000000	0.000000	0.000000	0.000000
ENSRNOG00000058661	RF00105	1:121580287-121580364	0.073146	1.364360	0.585564	0.077431	1.470503	0.105166	0.059655	0.063093	0.063465	1.386175	4.368173	3.052497
XLOC_022498	XLOC_022498	1:121591773-122303178	6.745965	41.474014	6.676013	36.973476	19.292841	23.424971	4.607406	73.826538	16.988712	37.468304	57.874363	47.329033
XLOC_022508	XLOC_022508	1:121603853-121606642	0.375315	0.537502	0.065481	0.404646	0.139560	0.299492	0.000000	0.708852	0.054155	0.217807	0.656685	0.897592
XLOC_022509	XLOC_022509	1:121617374-121864690	0.516535	2.721253	0.618119	2.419159	1.820263	1.728427	0.319689	4.987279	0.965542	2.075303	3.511439	2.813262
XLOC_022510	XLOC_022510	1:121657763-121684912	0.320703	0.493450	0.000000	5.277114	0.179003	0.418958	0.077760	0.631348	0.187065	0.197559	0.350344	0.511827
XLOC_022511	XLOC_022511	1:121661599-122278493	2.596811	19.095768	2.734911	20.624737	10.176301	11.934371	1.588115	32.484882	7.770124	16.227552	25.579815	21.046713
XLOC_022512	XLOC_022512	1:121671366-121823906	0.221195	1.460250	0.102477	2.096637	0.647878	0.700793	0.180255	2.715393	0.437235	1.496588	2.198839	1.730206
XLOC_007026	XLOC_007026	1:121671391-121823604	0.000000	0.403395	0.069813	0.028085	0.000000	0.000000	0.000000	0.203076	0.033588	0.000000	0.072248	0.053693
XLOC_007027	XLOC_007027	1:121673509-121743794	0.000000	0.185839	0.000000	0.416537	0.040732	0.000000	0.000000	0.567816	0.027674	0.100245	0.088998	0.185400
XLOC_022513	XLOC_022513	1:121677600-121685677	0.014078	0.469727	0.085820	1.438216	0.140801	0.272091	0.000000	0.760246	0.187951	0.124499	0.805315	0.147634
XLOC_022514	XLOC_022514	1:121680952-121683382	0.106291	1.039807	0.049289	2.564120	0.050801	0.498974	0.079041	1.239972	0.299523	0.672646	0.859409	0.621088
XLOC_022515	XLOC_022515	1:121693457-121749404	0.210910	1.166205	0.238273	1.361188	0.511619	1.036898	0.153752	3.136948	0.529297	1.039822	1.934326	1.755350
XLOC_022516	XLOC_022516	1:121724812-121807018	0.189253	1.469686	0.155163	1.409770	0.766729	0.825010	0.144302	2.966913	0.603940	1.495551	2.159136	1.611969
XLOC_022517	XLOC_022517	1:121753017-121753867	0.063056	0.315440	0.067834	0.298081	0.210219	0.284893	0.066428	0.723550	0.194076	0.297121	0.771694	0.069890
XLOC_022518	XLOC_022518	1:121755339-121852197	0.250952	1.574064	0.205060	1.346784	0.636336	0.880959	0.105224	2.863060	0.624115	1.528313	2.022257	1.679788
XLOC_022519	XLOC_022519	1:121758530-121761524	0.350018	1.459640	0.091819	1.461852	0.693806	0.844829	0.048827	2.247314	0.287042	0.858905	2.762420	1.683390
XLOC_022520	XLOC_022520	1:121764805-121854321	0.101975	2.069270	0.132695	1.653784	0.414408	1.004742	0.197961	3.675577	0.262292	1.566182	2.617337	1.576890
XLOC_022521	XLOC_022521	1:121772866-121851135	0.589315	3.501922	0.636154	2.810995	2.015963	2.048261	0.141144	6.228033	1.366517	2.763656	4.367709	3.063294
XLOC_022522	XLOC_022522	1:121783285-121868884	0.296367	2.084149	0.413063	1.851695	1.170749	1.228398	0.292116	3.957669	0.748722	1.813335	2.861588	2.817266
XLOC_007039	XLOC_007039	1:121793308-122072289	0.275346	1.204227	0.154789	0.276900	0.413224	0.654492	0.117977	0.793949	0.107088	0.769077	1.024692	1.192943
XLOC_007040	XLOC_007040	1:121845941-121849032	0.213144	0.189318	0.297111	0.225195	0.238454	0.184035	0.251884	0.390346	0.286346	0.285028	0.446382	0.252855
XLOC_022524	XLOC_022524	1:121974327-121975474	0.000000	0.058829	0.000000	1.682614	0.000000	0.005169	0.000000	0.000000	0.000000	0.109889	0.006206	0.000000
XLOC_007041	XLOC_007041	1:121992580-122219356	0.003443	0.049826	0.000000	0.349157	0.000000	0.171992	0.000000	0.073705	0.180381	0.013015	0.185207	0.141467
XLOC_007042	XLOC_007042	1:122029636-122107885	0.034504	0.156981	0.063668	0.304580	0.000000	0.124771	0.000000	0.228729	0.043720	0.064992	0.460739	0.194343
XLOC_007043	XLOC_007043	1:122051010-122066591	0.000000	0.241916	0.000000	0.000000	0.000000	0.000000	0.139607	0.309228	0.000000	0.000000	0.133178	0.000000
XLOC_007052	XLOC_007052	1:122111572-122149697	0.067221	0.228577	0.000000	0.129662	0.000000	0.000000	0.000000	0.105587	0.075120	0.142237	0.111267	0.078798
XLOC_007055	XLOC_007055	1:122129073-122168083	0.000000	0.059827	0.025851	0.092371	0.000000	0.045860	0.000000	0.181241	0.010788	0.345644	0.105241	0.051979
XLOC_007058	XLOC_007058	1:122134185-122228107	0.221277	1.063589	0.118414	0.763801	0.476061	0.484539	0.163674	1.579466	0.197373	1.005691	1.220527	0.809077
XLOC_007080	XLOC_007080	1:122185374-122186981	0.075477	0.313426	0.080826	0.267008	0.476843	0.083424	0.012297	0.435017	0.165767	0.224168	0.147309	0.170620
XLOC_007081	XLOC_007081	1:122188202-122240325	0.035924	0.074263	0.058774	0.080435	0.111892	0.000000	0.000000	0.098889	0.037186	0.136233	0.344175	0.129884
XLOC_007102	XLOC_007102	1:122296916-122302609	0.000000	0.152932	0.000000	0.000000	0.160044	0.120377	0.000000	0.318878	0.149079	0.117910	0.153253	0.000000
ENSRNOG00000046685	Mir344a-2	1:122307647-122343368	0.348953	1.614669	0.725924	3.803307	2.541939	1.036314	0.441171	2.196399	2.430500	1.360215	1.997235	4.341758
XLOC_007105	XLOC_007105	1:122311471-122319368	0.049367	0.287506	0.170880	0.279235	0.059750	0.030416	0.207184	0.298037	0.058337	0.139545	0.255791	0.212023
XLOC_022533	XLOC_022533	1:122319511-122860327	1.210437	4.919240	2.268185	5.042309	4.212746	4.680908	0.970456	7.637402	3.403543	4.027429	7.849090	7.645763
ENSRNOG00000049433	rno-mir-344a-1	1:122319511-122689352	1.402586	6.004187	1.461769	5.723833	2.900150	4.339921	1.412617	9.515000	3.122351	7.738221	8.902571	7.005246
ENSRNOG00000049846	Mir344g	1:122409917-122409995	0.046767	0.061717	0.061984	0.089465	0.069889	0.063322	0.060254	0.081937	0.068887	0.057332	0.103494	0.081217
ENSRNOG00000045763	AABR07004022.1	1:122412726-122860285	1.745520	8.634603	1.341390	7.739307	5.520179	5.966063	1.434087	13.432670	4.272685	8.775356	11.220706	10.216565
XLOC_022534	XLOC_022534	1:122427840-122432038	0.065428	0.844365	0.111393	1.010732	0.326731	0.482996	0.114429	0.968441	0.241519	0.476461	1.075822	0.782966
ENSRNOG00000045909	Mir344i	1:122467382-122656827	0.455777	4.858660	0.720334	4.500709	2.770508	3.401482	0.630402	7.038897	2.116513	6.543277	7.408628	6.505485
ENSRNOG00000047301	AABR07004021.1	1:122508129-122658644	0.118779	1.582658	0.106948	1.749535	0.926561	0.899799	0.090511	2.222792	0.702394	1.363650	2.181979	1.645925
ENSRNOG00000045916	AABR07004018.1	1:122520347-122645187	0.230581	3.221539	0.404664	1.979523	1.880979	1.294427	0.340124	3.551339	0.941442	2.336392	3.040524	3.079120
XLOC_022538	XLOC_022538	1:122540476-122545274	0.250546	1.125588	0.168946	0.790444	0.544236	0.751593	0.079418	1.539839	0.488087	0.969623	1.503565	1.271145
XLOC_007108	XLOC_007108	1:122613629-122626016	0.136478	0.376632	0.073410	0.000000	0.000000	0.000000	0.415033	0.270024	0.000000	0.248357	0.356492	0.000000
ENSRNOG00000048533	AABR07004025.1	1:122701245-122701342	0.000000	0.261639	0.000000	0.401284	0.280177	0.049625	0.000000	0.130796	0.319914	0.173873	0.315889	0.080002
XLOC_007110	XLOC_007110	1:122757994-122816910	0.113001	0.352721	0.000000	0.129539	0.062788	0.064139	0.119043	0.061086	0.087729	0.284004	0.077000	0.436902
XLOC_022546	XLOC_022546	1:122785122-122839625	0.000000	0.326270	0.000000	0.263738	0.428554	0.044591	0.000000	0.582430	0.106055	0.101227	0.045599	0.541104
XLOC_007113	XLOC_007113	1:122803975-122823102	0.000000	0.183313	0.045751	0.004389	0.169341	0.000000	0.046354	0.230620	0.129919	0.157454	0.117727	0.332256
XLOC_022549	XLOC_022549	1:122806155-122838854	0.232846	0.459751	0.075021	0.463667	0.310603	0.286223	0.133094	0.610740	0.209404	0.287322	0.609614	0.655156
XLOC_007119	XLOC_007119	1:122823157-122857389	0.185896	0.293333	0.020201	0.139232	0.170092	0.228377	0.080725	0.325101	0.248781	0.455303	0.440516	0.175602
XLOC_007120	XLOC_007120	1:122823865-122825196	0.000000	0.190213	0.066708	0.190381	0.000000	0.061242	0.130651	0.242469	0.128378	0.124678	0.176183	0.021993
ENSRNOG00000058845	AABR07004033.1	1:122881326-122889272	0.000000	0.000000	0.000000	0.000000	0.000000	0.000000	0.000000	0.000000	0.000000	0.000000	0.000000	0.000000
ENSRNOG00000010146	Ndn	1:122981755-122983351	134.718384	65.009186	99.614914	89.706329	86.754562	86.657219	121.776054	84.528549	78.674713	74.178139	58.447601	67.667816
ENSRNOG00000010172	Mkrn3	1:123062863-123064642	0.931495	0.879142	0.978482	2.039999	1.392779	1.258097	0.622568	1.021804	0.514488	2.185295	0.410594	0.754351
ENSRNOG00000024429	Peg12	1:123097861-123100464	0.028695	0.023727	0.123395	0.067779	0.000000	0.060154	0.048327	0.012368	0.000000	0.124726	0.000000	0.050887
XLOC_022557	XLOC_022557	1:123130196-123152865	0.804396	5.767719	0.765401	2.472021	2.835220	3.458562	0.400986	8.203944	2.247735	4.405776	7.880503	6.231032
ENSRNOG00000060733	AABR07004101.2	1:124927202-124930193	0.032784	0.000000	0.035307	0.025887	0.000000	0.000000	0.0	0.0	0.022674	0.0	0.014926	0.000000
XLOC_022648	XLOC_022648	1:124898612-124906060	0.430750	0.373386	0.366802	0.312200	0.410949	0.478705	0.303046	0.361867	0.261571	0.516488	0.343426	0.359010
ENSRNOG00000015829	Trpm1	1:124983452-125099573	0.079855	0.021650	0.116547	0.037937	0.047687	0.113155	0.082465	0.037254	0.055984	0.069215	0.068457	0.086161
ENSRNOG00000035648	Mir211	1:125042119-125042224	0.000000	0.013600	0.000000	0.000000	0.000000	0.000000	0.000000	0.000000	0.000000	0.000000	0.000000	0.000000
ENSRNOG00000049002	AABR07004101.1	1:125078389-125098430	0.257195	0.000000	0.000000	0.000000	0.000000	0.000000	0.000000	0.000000	0.121568	0.000000	0.000000	0.000000
XLOC_007183	XLOC_007183	1:124712279-124712788	0.000000	0.000000	0.000000	0.000000	0.000000	0.079647	0.000000	0.000000	0.000000	0.257231	0.000000	0.000000
ENSRNOG00000057921	AABR07004100.2	1:124743354-124756178	0.000000	0.059965	0.000000	0.000000	0.000000	0.000000	0.000000	0.000000	0.000000	0.000000	0.000000	0.000000
ENSRNOG00000016090	Mtmr10	1:125124743-125175857	13.684912	8.344307	9.116317	5.751650	10.684776	9.482137	9.725835	5.318537	6.727662	9.932048	10.578658	7.028663
ENSRNOG00000023985	Fan1	1:125181838-125209727	2.922418	1.773407	2.204374	1.707699	2.729137	2.571082	2.237602	1.696716	2.036441	2.439774	2.003318	1.387859
ENSRNOG00000016266	Mphosph10	1:125212849-125229052	4.919333	3.772490	4.400290	3.941018	4.691178	3.898726	4.752839	3.704782	4.394202	4.747172	3.931091	3.480691
ENSRNOG00000016327	Mcee	1:125229469-125252666	8.765780	6.641245	8.696655	6.414805	7.809117	6.487997	7.963167	6.365107	7.473889	7.718169	6.839296	6.673740
ENSRNOG00000016358	Apba2	1:125367280-125548890	43.548641	42.648235	53.405434	52.475979	36.636852	46.144840	46.784187	45.162281	50.911240	30.253056	42.352028	40.736740
XLOC_007246	XLOC_007246	1:126047917-126075566	0.682373	0.000000	0.071942	0.000000	0.911900	0.283083	0.543089	0.000000	0.000000	0.574404	0.000000	0.079064
XLOC_007247	XLOC_007247	1:126049901-126051896	0.466197	0.000000	0.000000	0.000000	0.523605	0.000000	0.349648	0.000000	0.000000	0.301288	0.104481	0.000000
ENSRNOG00000023496	Fam189a1	1:125553439-125967756	13.106550	12.203870	16.413385	17.927011	10.880261	13.597258	14.917282	15.513497	15.847979	10.928855	13.570635	12.598522
ENSRNOG00000056928	AABR07004134.1	1:126632957-126633307	0.000000	0.0	0.0	0.0	0.0	0.0	0.0	0.0	0.0	0.0	0.0	0.0
XLOC_007296	XLOC_007296	1:126708075-126710289	0.149420	0.407523	0.298268	0.325555	0.172108	0.175118	0.273157	0.342917	0.422158	0.053268	0.695032	0.218715
ENSRNOG00000024460	Tarsl2	1:126523169-126559489	8.410281	6.923841	8.102710	8.760030	6.221444	7.063893	8.276744	6.530873	8.289293	5.601951	6.564177	5.285764
XLOC_022696	XLOC_022696	1:126566516-126574348	0.253246	0.261749	0.266894	0.149581	0.276260	0.161911	0.315203	0.239873	0.188544	0.240794	0.234694	0.035130
XLOC_007289	XLOC_007289	1:126566516-126574942	5.366158	3.893124	5.113592	4.762769	3.744367	5.715318	5.616978	3.291283	4.898320	3.032001	3.503964	3.543035
ENSRNOG00000011077	Tjp1	1:126146489-126227469	30.040550	28.384409	29.134668	26.757702	30.823959	28.246412	29.979235	23.074993	32.114182	31.939611	31.184649	28.799459
XLOC_022687	XLOC_022687	1:126352933-126381019	0.219797	1.500108	0.227541	1.204505	0.942333	0.910430	0.158125	1.457337	0.902076	0.947951	1.744121	1.192294
ENSRNOG00000053064	AABR07004130.1	1:126386929-126403406	2.291316	3.838738	2.605043	3.466120	2.311515	2.696640	2.332909	3.601784	3.136776	2.469084	3.565985	3.522315
ENSRNOG00000011526	Pcsk6	1:126749508-126947392	4.257406	3.408676	3.519791	2.799078	4.051332	3.844437	4.214234	2.153228	3.178797	2.729793	3.581697	4.276261
ENSRNOG00000011932	Snrpa1	1:126961389-126974453	8.959317	7.810846	8.004166	7.861221	7.717831	8.191710	8.317873	8.038330	9.643025	8.386374	8.013701	6.094224
ENSRNOG00000012576	Selenos	1:126979575-126989344	19.371880	17.409298	17.135902	15.747673	18.357155	15.435995	20.000105	14.335700	14.711411	17.194481	15.623558	15.817251
ENSRNOG00000012698	Chsy1	1:127010588-127071570	10.099517	6.367972	8.761988	6.423800	9.281917	8.743686	9.132045	5.796643	7.118898	7.920568	6.531955	6.646278
ENSRNOG00000052070	Aldh1a3	1:127301128-127337882	0.862828	0.172620	0.570657	0.279903	0.917220	0.437797	0.644694	0.398441	0.550536	0.803316	0.269293	0.182006
ENSRNOG00000012730	Lrrk1	1:127166431-127292090	1.568888	0.871806	1.093365	1.081158	1.373245	1.165009	1.277377	0.635415	1.252502	1.403171	1.081500	1.096497
ENSRNOG00000042776	Lins1	1:127604197-127625577	1.144124	0.916532	1.250392	1.122639	1.126671	1.206377	1.463819	0.956044	1.243045	1.327254	0.912698	1.046475
ENSRNOG00000013823	Cers3	1:127648234-127781017	0.129018	0.066731	0.085302	0.117126	0.111642	0.078948	0.126091	0.074446	0.092195	0.019197	0.043529	0.039555
ENSRNOG00000060823	AABR07004153.1	1:127654062-127654191	0.000000	0.000000	0.000000	0.000000	0.000000	0.000000	0.000000	0.000000	0.000000	0.000000	0.000000	0.000000
ENSRNOG00000013795	Asb7	1:127543362-127599257	7.966405	6.904287	9.022427	6.778909	6.902048	7.855080	9.339610	7.857658	9.243298	8.222115	7.722225	6.551750
XLOC_022810	XLOC_022810	1:128125216-128147342	0.000000	0.077912	0.242874	0.060741	0.079221	0.000000	0.000000	0.000000	0.156061	0.024693	0.051366	0.041775
ENSRNOG00000050624	Lysmd4	1:128199322-128203268	6.688324	5.176022	7.069613	6.459273	6.131381	6.453434	6.914203	5.405420	6.111887	5.946971	4.943696	5.415468
ENSRNOG00000047756	Mef2a	1:128209971-128341263	37.761887	27.076159	41.210598	32.190037	41.450134	39.753448	39.907452	27.231272	34.238834	45.249313	27.007193	25.600409
ENSRNOG00000057496	LOC103691157	1:128398115-128419758	0.066321	0.068548	0.023782	0.0	0.0	0.025096	0.0	0.0	0.0	0.035778	0.060256	0.017514
ENSRNOG00000023274	Lrrc28	1:128486166-128604188	7.823931	5.223991	6.506067	5.925392	7.440529	6.520482	6.890435	5.125655	5.553043	6.927233	5.375189	6.297762
ENSRNOG00000053158	RF00156	1:128529585-128538227	0.111063	0.073081	0.021896	0.076953	0.173477	0.107643	0.053025	0.618182	0.118082	0.543705	0.134492	0.113252
XLOC_007391	XLOC_007391	1:128825937-128826305	0.000000	0.0	0.0	0.0	0.0	0.000000	0.0	0.0	0.0	0.0	0.000000	0.420204
ENSRNOG00000014030	Synm	1:128692112-128722048	5.819542	3.786448	6.741472	3.078422	5.372911	6.913066	6.223796	3.612608	4.260312	4.048047	5.019408	3.163255
ENSRNOG00000058956	Pgpep1l	1:129216152-129217058	0.000000	0.0	0.000000	0.0	0.000000	0.000000	0.036002	0.074634	0.155670	0.098927	0.041646	0.0
ENSRNOG00000032310	AABR07004183.1	1:129227595-129228068	0.000000	0.0	0.000000	0.0	0.0	0.000000	0.0	0.0	0.0	0.0	0.0	0.0
XLOC_007485	XLOC_007485	1:130079312-130082679	0.161097	0.106680	0.000000	0.215957	0.523692	0.316326	0.0	0.439719	0.414112	0.506640	1.119026	0.456464
ENSRNOG00000010775	Arrdc4	1:129766100-129780356	2.814435	1.624546	2.055375	1.631389	2.801115	2.820988	2.233158	1.604375	2.025651	2.934781	1.649395	2.153987
XLOC_022925	XLOC_022925	1:131359958-131361158	0.288501	0.0	0.0	0.0	0.000000	0.000000	0.080237	0.0	0.0	0.175924	0.000000	0.0
ENSRNOG00000057208	AABR07004221.2	1:130542722-130715502	0.000000	0.0	0.0	0.0	0.0	0.0	0.0	0.0	0.0	0.120255	0.0	0.0
ENSRNOG00000051696	AABR07004221.1	1:130651031-130652295	0.000000	0.0	0.0	0.0	0.0	0.0	0.0	0.0	0.0	0.000000	0.0	0.0
ENSRNOG00000044576	RF00001	1:128923396-129213900	1.557548	1.305242	1.642122	0.842256	1.204787	1.716665	1.291549	0.736641	1.421836	1.739139	1.044816	0.768146
ENSRNOG00000014187	Igf1r	1:128924966-129206516	15.961720	12.740130	15.184801	10.816714	16.109686	18.339960	15.687691	9.774436	14.729264	16.840004	13.832227	11.673405
ENSRNOG00000054097	AABR07004232.2	1:131688104-131690120	0.123814	0.136933	0.038074	0.025375	0.078005	0.0	0.055927	0.055866	0.073333	0.250096	0.811044	0.230135
XLOC_007725	XLOC_007725	1:132511168-132515426	0.000000	0.048401	0.0	0.000000	0.239224	0.040392	0.037484	0.000000	0.143461	0.0	0.048492	0.078876
XLOC_022981	XLOC_022981	1:132870793-132881958	0.354632	0.000000	0.0	0.000000	0.0	0.000000	0.053698	0.0	0.000000	0.000000	0.000000	0.0
ENSRNOG00000010308	Nr2f2	1:131448447-131460473	9.909892	6.625695	7.452065	5.663944	12.992645	7.445853	9.029413	3.879024	5.932645	27.663076	13.375859	6.592326
ENSRNOG00000053709	AABR07004229.1	1:131459202-131496928	0.046652	0.287357	0.207538	0.652851	0.784031	0.366068	0.287862	0.372395	0.378953	1.891025	1.098772	0.559071
XLOC_007570	XLOC_007570	1:131480474-131496928	0.224863	0.354006	0.061176	0.264648	0.761490	0.293749	0.151179	0.445298	0.285954	1.124992	0.931815	0.256736
XLOC_007582	XLOC_007582	1:131498774-131573648	0.259812	0.260067	0.328451	0.353772	0.214373	0.047622	0.185299	0.665725	0.419886	0.679428	1.227412	0.116927
XLOC_007587	XLOC_007587	1:131516099-131541985	0.079273	0.215459	0.032331	0.187409	0.165484	0.083572	0.031347	0.166009	0.102719	0.410688	0.486090	0.065091
ENSRNOG00000009932	Mctp2	1:133324301-133559975	0.696099	0.771838	0.665003	0.822638	0.799944	0.766284	1.001931	0.935585	0.979083	0.851460	1.130323	1.041650
XLOC_023027	XLOC_023027	1:133968583-133978319	0.290181	0.0	0.0	0.0	0.0	0.0	0.0	0.0	0.0	0.0	0.0	0.0
ENSRNOG00000053587	AABR07004254.1	1:134028907-134030448	0.038417	0.000000	0.0	0.0	0.042692	0.000000	0.0	0.0	0.041623	0.0	0.052007	0.042581
ENSRNOG00000051253	LOC102553828	1:133713281-133717580	5.465064	2.393414	2.255606	2.216100	5.385956	0.666997	4.954428	1.114965	2.066629	4.879385	2.784617	2.418728
XLOC_023088	XLOC_023088	1:134567203-134569509	0.100484	0.0	0.000000	0.0	0.0	0.291240	0.0	0.0	0.0	0.0	0.0	0.0
ENSRNOG00000012874	Rgma	1:134699299-134742514	32.461994	20.921894	29.456045	17.316156	24.879381	31.342625	27.924030	16.597927	22.928621	18.751671	19.043900	20.644653
ENSRNOG00000051226	AABR07004269.4	1:134921673-134922407	0.028330	0.020875	0.063724	0.147057	0.0	0.0	0.025704	0.0	0.000000	0.038425	0.011823	0.087740
XLOC_023140	XLOC_023140	1:134952662-134955329	0.283138	0.235493	0.403174	0.174251	0.266815	0.258724	0.199031	0.135168	0.323036	0.271533	0.226925	0.185800
XLOC_007813	XLOC_007813	1:134953748-134956206	0.216634	0.096695	0.282926	0.086363	0.216468	0.165914	0.396264	0.053374	0.075646	0.138105	0.000000	0.148494
ENSRNOG00000012384	AABR07004269.1	1:135042162-135042540	0.007623	0.113842	0.0	0.111218	0.0	0.0	0.0	0.0	0.0	0.010433	0.035467	0.0
ENSRNOG00000012716	Chd2	1:134757934-134887841	14.271167	16.510370	13.365854	15.398626	17.357338	17.240635	13.522850	17.657299	14.092716	19.755116	17.809683	15.560637
ENSRNOG00000051039	LOC108349594	1:134873400-134887841	2.667582	4.501459	3.020899	3.573998	4.327367	4.785269	3.090906	4.031161	2.597989	6.028228	5.891643	5.134572
ENSRNOG00000012031	St8sia2	1:135336374-135406700	1.622737	0.316563	0.730409	0.092074	1.397521	1.192620	0.705693	0.085563	0.080647	1.842467	0.207655	0.393841
ENSRNOG00000058004	AABR07004269.6	1:135065062-135143151	0.651067	0.867685	0.931745	0.579223	0.780648	0.991788	0.890789	1.072575	0.808569	0.662491	1.225212	0.833872
ENSRNOG00000012369	Fam174b	1:135083974-135187368	1.004925	7.716295	5.687693	10.281334	1.475780	0.987364	1.104172	0.761234	6.868080	0.525521	6.345333	5.935755
ENSRNOG00000051304	AABR07004272.1	1:135135833-135162693	0.000000	0.071641	0.000000	0.000000	0.000000	0.000000	0.000000	0.000000	0.000000	0.000000	0.000000	0.000000
ENSRNOG00000051334	AABR07004305.1	1:136285046-136285703	0.337497	0.145228	0.226561	0.416750	0.347962	0.041595	0.309127	0.163625	0.397094	0.341942	0.394125	0.028529
XLOC_023216	XLOC_023216	1:136603693-136624300	0.044840	0.125021	0.0	0.029898	0.081989	0.143171	0.0	0.415033	0.075405	0.072763	0.254274	0.106078
XLOC_023232	XLOC_023232	1:136655582-136657099	0.188076	0.960315	0.600492	1.180593	0.681307	0.575663	0.600849	1.068058	1.284454	0.735656	0.991403	1.125340
ENSRNOG00000032798	Slco3a1	1:135790810-136073540	11.830047	7.654545	9.493795	9.016160	12.549268	10.277424	10.837970	8.162907	9.608843	10.375439	7.985420	6.982034
ENSRNOG00000053689	AABR07004294.1	1:135790868-136073528	1.386065	0.820116	0.870076	0.643091	1.004702	1.152000	1.258685	0.130995	1.029327	0.668845	0.387164	0.000000
ENSRNOG00000060667	AABR07004297.1	1:135790869-136079377	1.521049	2.821638	4.288186	4.937089	2.594175	2.919526	3.052809	5.093968	4.647170	3.253176	3.141229	2.893928
XLOC_007961	XLOC_007961	1:136079550-136244797	0.709323	0.589188	0.965550	1.076432	0.961253	0.908912	0.884100	1.402819	1.182810	0.783673	0.772767	0.988557
ENSRNOG00000051176	AABR07004304.1	1:136246888-136247023	0.000000	0.056030	0.000000	0.000000	0.0	0.000000	0.000000	0.000000	0.000000	0.0	0.000000	0.000000
ENSRNOG00000010964	Akap13	1:137014272-137315272	3.983915	3.265094	3.747309	3.222848	6.007039	4.473853	3.469827	2.834766	3.504959	8.467569	3.227196	3.807978
ENSRNOG00000057041	RF00100	1:136661028-136842687	4.164842	4.873664	7.498404	5.375896	2.308515	4.244090	5.500606	4.951621	6.087346	2.861653	3.792079	3.546549
ENSRNOG00000011160	AC126641.1	1:136664204-136842247	116.775208	129.825211	190.578522	227.207581	108.608856	176.349869	167.797348	165.939285	232.003235	87.419228	115.101433	130.355133
XLOC_023240	XLOC_023240	1:137409302-137427306	1.928282	1.954546	2.148065	2.167122	3.229954	2.091864	2.042791	2.023012	2.235966	2.864347	1.834769	2.232952
XLOC_023243	XLOC_023243	1:137412931-137418457	2.027111	1.627296	1.845069	1.655678	2.427603	2.030221	1.739406	1.626434	2.485247	2.611210	1.637227	2.243155
XLOC_008064	XLOC_008064	1:137418598-137427277	0.152196	0.129502	0.162639	0.093687	0.146633	0.155388	0.143108	0.052378	0.145005	0.225700	0.132490	0.066132
ENSRNOG00000022610	Agbl1	1:137799185-138711126	0.114702	0.408095	0.111947	0.358175	0.171135	0.061163	0.110173	0.223270	0.190821	0.209837	0.137425	0.312099
XLOC_023304	XLOC_023304	1:139788466-139843401	0.503207	0.495223	0.718449	0.108174	0.390643	0.125706	0.328552	0.525057	0.044589	0.572081	0.170499	0.075891
XLOC_023312	XLOC_023312	1:139825992-139829703	0.436270	0.225821	0.623890	0.136433	0.208611	0.165877	0.433820	0.000000	0.104823	0.000000	0.233917	0.116238
XLOC_008117	XLOC_008117	1:139842059-139843191	0.000000	0.278309	0.000000	0.000000	0.000000	0.000000	0.000000	0.086885	0.000000	0.000000	0.000000	0.298448
XLOC_023328	XLOC_023328	1:140262681-140264437	0.648666	1.201036	0.747029	1.451069	0.685955	0.743702	0.926431	1.438564	0.984668	1.527325	1.209195	1.081495
XLOC_023332	XLOC_023332	1:140278790-140308028	0.140945	0.119018	0.370427	0.205956	0.413042	0.719417	0.061691	0.412389	0.120426	1.507836	0.031923	0.230410
XLOC_023330	XLOC_023330	1:140272057-140277795	0.135190	0.079565	0.259560	0.241409	0.586217	0.341244	0.060813	0.218216	0.212430	0.937635	0.110897	0.145647
ENSRNOG00000018674	Ntrk3	1:139890560-140262503	26.889299	28.356150	27.419956	36.099556	27.729332	24.788818	29.397551	34.683083	33.447937	31.352324	28.140774	27.202515
XLOC_008134	XLOC_008134	1:140569901-140572518	0.658842	0.304786	0.345573	0.527186	1.215669	1.602747	0.443968	0.490160	0.233732	0.985462	0.775098	0.192331
ENSRNOG00000035477	Mir7a2	1:140569942-140578693	1.094756	0.674722	0.507612	0.878852	0.724131	1.064458	0.703383	0.966904	0.825012	1.260806	0.863609	0.541920
XLOC_023417	XLOC_023417	1:140573666-140574488	0.162560	0.082206	0.132465	0.000000	0.235076	0.395843	0.043364	0.090516	0.111219	0.183932	0.114098	0.046243
ENSRNOG00000018547	Mrpl46	1:140469280-140487240	6.827261	5.606363	5.935051	4.700760	4.835926	4.975702	5.217509	4.628380	4.718658	5.470668	5.395134	3.608901
ENSRNOG00000018531	Mrps11	1:140469549-140487248	12.222874	9.815489	14.080904	10.205124	11.930762	11.723286	13.128416	11.157550	9.109255	11.518042	7.943463	8.631350
ENSRNOG00000018515	Det1	1:140519702-140535934	1.367598	1.175581	1.488086	1.104892	2.143024	1.843554	1.742796	1.274772	1.594532	1.871096	1.296811	1.117579
XLOC_008136	XLOC_008136	1:140599228-140601549	0.000000	0.295620	0.230766	0.243570	0.672768	0.224304	0.150655	0.193268	0.184796	0.294135	0.291693	0.000000
XLOC_023427	XLOC_023427	1:140641718-140644979	0.276747	0.0	0.0	0.0	0.0	0.0	0.000000	0.0	0.0	0.0	0.0	0.0
ENSRNOG00000018421	Aen	1:140584380-140593745	3.520055	2.096501	2.930034	2.175786	3.415392	2.680004	2.647066	2.362783	2.088277	3.537015	2.252202	2.250355
ENSRNOG00000022321	Hapln3	1:140827295-140835151	0.404696	0.836724	0.585562	0.632027	0.441622	0.660452	0.549314	0.918180	0.675886	0.332751	0.422809	0.535339
ENSRNOG00000028992	Acan	1:140762758-140824441	0.897462	1.482824	0.833194	0.898805	2.557345	0.839071	0.907541	0.724893	0.789274	5.325381	1.544974	1.268113
XLOC_008142	XLOC_008142	1:140913752-140918197	0.000000	0.0	0.000000	0.0	0.0	0.489367	0.0	0.000000	0.070603	0.0	0.000000	0.0
ENSRNOG00000017510	Mfge8	1:140845465-140860894	77.556816	50.965912	74.738419	47.744007	62.446953	79.634689	72.477219	37.765972	66.805679	65.746529	51.301556	56.455105
ENSRNOG00000016897	Rlbp1	1:141097695-141111400	5.946483	5.681230	8.622981	6.378785	9.875502	8.042197	6.820971	4.159976	4.809043	16.649111	5.107925	7.394360
ENSRNOG00000054807	RF00100	1:140998225-141092212	2.632584	2.446963	2.916202	2.327345	1.968357	2.199845	2.519043	2.358223	2.700320	2.611941	2.137005	2.070781
ENSRNOG00000017120	Abhd2	1:140998240-141087405	39.996300	49.360279	44.979759	53.918667	36.173111	40.890915	43.018661	49.230453	51.097565	43.482445	46.852207	48.884258
ENSRNOG00000057415	AC106909.1	1:141011565-141011661	0.219800	0.705957	0.554675	1.558565	0.376660	0.617959	0.000000	0.390881	0.331718	0.738573	1.507544	0.824208
ENSRNOG00000054325	AABR07004397.3	1:141203709-141210059	0.088877	0.163265	0.000000	0.032937	0.0	0.0	0.141125	0.242651	0.130385	0.094236	0.023940	0.000000
ENSRNOG00000030679	AABR07004397.1	1:141214456-141214791	0.707484	0.866700	1.022021	0.987316	0.812242	0.672193	1.004895	0.600444	0.596222	0.796699	0.756472	1.044443
ENSRNOG00000031802	AABR07004397.2	1:141218095-141218277	42.363815	92.920761	76.706200	69.088203	46.537025	61.948093	58.355190	81.697021	44.477051	48.144295	65.299072	39.137177
ENSRNOG00000016689	Fanci	1:141120166-141172483	0.297769	0.469547	0.458736	0.560959	0.482524	0.602150	0.529640	0.415523	0.431779	0.366629	0.702650	0.432785
ENSRNOG00000032293	Polg	1:141172531-141188031	9.813068	8.171141	9.965238	9.020354	9.717688	9.759124	9.412241	7.602732	9.344541	8.962861	7.968795	8.421450
ENSRNOG00000015520	Ticrr	1:141391262-141433109	0.068180	0.023691	0.110050	0.061792	0.139225	0.149178	0.098479	0.034607	0.030807	0.040140	0.056226	0.074149
ENSRNOG00000015086	Plin1	1:141458181-141471010	0.030708	0.0	0.000000	0.0	0.022750	0.023239	0.007181	0.044340	0.000000	0.053293	0.013950	0.011421
ENSRNOG00000015367	AC096024.1	1:141434382-141452567	0.511284	0.363143	0.319509	0.327826	0.374013	0.334898	0.324943	0.146360	0.270860	0.621282	0.224677	0.265550
ENSRNOG00000026857	Kif7	1:141434625-141451075	1.748110	1.191161	1.173263	1.058728	2.143328	1.879828	1.600364	0.739179	1.056957	2.093160	1.031514	1.013607
ENSRNOG00000014951	Mesp1	1:141532390-141533908	0.023208	0.024229	0.050437	0.000000	0.052101	0.066351	0.049309	0.0	0.0	0.0	0.102871	0.103930
ENSRNOG00000014925	Mesp2	1:141550633-141553230	0.367678	0.133733	0.505327	0.286072	0.292784	0.400127	0.504847	0.227145	0.301132	0.183239	0.217111	0.357509
ENSRNOG00000026514	Wdr93	1:141481384-141527593	0.093474	0.125258	0.013500	0.069657	0.167414	0.903079	0.213688	0.138237	0.045230	0.063048	0.154225	0.062149
ENSRNOG00000034206	AC096024.2	1:141503833-141504111	0.000000	0.000000	0.000000	0.000000	0.000000	0.000000	0.056052	0.000000	0.000000	0.000000	0.000000	0.000000
XLOC_008159	XLOC_008159	1:141229814-141285699	1.159965	1.601324	0.949248	1.352081	2.050058	1.421474	0.554630	1.201870	0.952890	1.698181	1.138139	1.045047
XLOC_023493	XLOC_023493	1:141259089-141285699	0.162620	0.096520	0.168598	0.088854	0.338614	0.369721	0.171551	0.082045	0.097919	0.441236	0.193253	0.053543
XLOC_008160	XLOC_008160	1:141288144-141294768	0.230119	0.425072	0.292121	0.000000	0.602038	0.440152	0.193754	0.313493	0.000000	0.800677	0.617168	0.478438
XLOC_008161	XLOC_008161	1:141288435-141296419	0.084952	0.053615	0.021209	0.083292	0.088078	0.482532	0.102197	0.041921	0.054422	0.092194	0.092525	0.116253
ENSRNOG00000015526	Rhcg	1:141325856-141349881	0.074105	0.079498	0.077134	0.052786	0.059475	0.023327	0.032257	0.0	0.010615	0.045312	0.020198	0.017111
XLOC_008169	XLOC_008169	1:141371046-141382442	0.000000	0.041245	0.081482	0.141797	0.419498	0.701847	0.489610	0.059384	0.041585	0.049826	0.054019	0.088756
ENSRNOG00000014610	Anpep	1:141561334-141604273	0.555501	0.816161	0.520222	0.715625	0.704950	0.738436	0.492453	0.433097	0.728688	0.788662	0.593338	0.714766
ENSRNOG00000043141	Ap3s2	1:141612963-141655894	17.173862	13.355143	18.244438	14.874174	14.779305	14.456296	16.220533	13.804216	17.351515	14.332474	14.695654	16.049164
ENSRNOG00000041999	RF00001	1:141753477-141753577	0.058199	0.0	0.0	0.0	0.0	0.0	0.0	0.0	0.0	0.0	0.053773	0.013120
ENSRNOG00000014589	Arpin	1:141662850-141672810	3.298677	2.476169	2.735767	1.887512	3.031302	2.926770	3.111815	1.949694	2.292529	3.208647	2.615787	2.562308
ENSRNOG00000060197	AABR07004404.1	1:141664294-141679921	0.622174	0.180654	0.288148	0.187146	0.349233	0.362703	0.354533	0.185623	0.259813	0.382096	0.348501	0.307514
ENSRNOG00000056324	LOC102548818	1:141944081-141946193	0.044677	0.056137	0.093268	0.000000	0.129690	0.000000	0.061700	0.0	0.000000	0.042216	0.000000	0.000000
ENSRNOG00000061327	LOC102548889	1:141956486-141964577	0.015082	0.014494	0.024740	0.000000	0.043931	0.016873	0.000000	0.0	0.079601	0.000000	0.036929	0.000000
ENSRNOG00000014278	Zfp710	1:141758008-141870325	8.235764	5.476058	6.315831	4.825196	8.803068	7.953615	6.685128	4.060750	5.731326	6.849294	5.545423	5.344201
ENSRNOG00000047565	LOC100911186	1:141821916-141830764	13.243907	7.730552	10.472797	9.422401	13.711023	3.969303	10.875209	6.167876	8.296635	10.054838	0.000000	8.954443
ENSRNOG00000047000	Fuom	1:141832774-141836369	2.091084	0.865969	1.695207	0.961315	1.730201	1.255624	1.385963	0.630440	0.921735	1.293965	1.539594	1.919381
ENSRNOG00000013949	Idh2	1:141866283-141893705	33.235748	26.361347	28.070045	16.402874	32.147339	30.840931	30.948975	14.207302	24.006775	30.863211	26.422249	19.794884
ENSRNOG00000058477	AC114460.2	1:142134350-142134964	0.127770	0.0	0.000000	0.032045	0.000000	0.0	0.000000	0.000000	0.000000	0.0	0.0	0.0
XLOC_023534	XLOC_023534	1:141965921-141966246	0.000000	0.0	0.000000	0.000000	0.292640	0.000000	0.138709	0.0	0.000000	0.000000	0.000000	0.000000
XLOC_008202	XLOC_008202	1:141975783-141977339	0.101734	0.100517	0.106001	0.024078	0.337353	0.252794	0.064176	0.251113	0.178351	0.201887	0.041649	0.131803
ENSRNOG00000025167	Sema4b	1:141977457-142034161	4.418262	4.009876	4.091410	4.149373	5.608435	4.648768	4.610554	3.008925	4.606879	6.406376	4.484420	3.649896
ENSRNOG00000033498	Cib1	1:142010892-142044541	8.377414	5.486099	7.385367	4.812396	6.481434	5.966060	7.669692	4.210016	5.448564	6.701607	7.418321	5.458455
ENSRNOG00000013553	Ngrn	1:142050458-142056336	39.077499	26.800510	36.057602	31.248781	34.961605	35.814644	37.851650	28.342478	32.534813	37.216686	28.294031	29.455624
ENSRNOG00000013149	Vps33b	1:142060955-142083953	6.362185	6.049960	5.808344	6.535315	5.962595	5.119257	5.618934	6.720995	6.004472	6.791796	5.490651	5.136533
ENSRNOG00000013057	Prc1	1:142087208-142108746	1.797336	0.625220	0.534134	0.359978	0.919073	1.862874	1.442577	0.239268	0.245760	0.474694	0.987304	0.510644
ENSRNOG00000042059	Rccd1	1:142109252-142114634	0.803411	0.856035	1.278126	0.943444	0.842061	1.019176	0.770251	0.699211	1.021522	0.967587	0.918225	0.829658
ENSRNOG00000012357	Unc45a	1:142118917-142133627	10.924205	8.600267	11.357383	9.845385	9.640495	12.179863	11.421925	9.902278	9.897838	9.286920	9.664136	9.172557
ENSRNOG00000011683	Fes	1:142174501-142183884	0.573682	0.679993	0.465688	0.530643	0.435250	0.489374	0.304668	0.389231	0.437763	0.569251	0.339461	0.473831
ENSRNOG00000012236	Hddc3	1:142136452-142164604	9.550375	5.849677	8.870457	6.194532	8.440620	8.596386	9.906135	4.902515	8.117050	7.486820	6.612713	6.829132
ENSRNOG00000012055	Man2a2	1:142143799-142164263	30.400724	22.189823	27.880554	24.398808	27.914267	27.332418	30.944500	19.489349	27.995434	27.160797	22.754225	21.996603
XLOC_008218	XLOC_008218	1:142232541-142238338	0.000000	0.000000	0.000000	0.000000	0.000000	0.000000	0.000000	0.000000	0.328098	0.000000	0.000000	0.000000
ENSRNOG00000011352	Furin	1:142185094-142197182	11.835178	9.020885	12.026065	10.451749	13.351087	11.617168	12.038911	8.676257	10.767695	13.606826	9.357321	9.293552
ENSRNOG00000011975	Crtc3	1:142388296-142500555	3.763472	3.014139	3.123538	2.296701	3.863015	4.456686	3.917070	3.172396	3.161385	4.233797	3.731372	3.037311
ENSRNOG00000061889	AABR07004428.1	1:142418062-142511760	0.346288	0.143992	0.293326	0.128931	0.335733	0.209596	0.233521	0.254785	0.247095	0.302321	0.117946	0.295960
ENSRNOG00000022164	Zscan2	1:142679345-142695475	2.157159	1.182822	1.542777	0.934585	1.587992	1.699651	1.514973	1.216058	1.307403	2.052377	1.297472	0.979061
XLOC_023577	XLOC_023577	1:142700861-142708397	0.000000	0.000000	0.148187	0.000000	0.037476	0.000000	0.000000	0.000000	0.000000	0.000000	0.525299	0.000000
ENSRNOG00000012002	Iqgap1	1:142525046-142615673	5.400706	4.924062	4.269265	4.923066	5.522387	5.692879	4.413404	4.330953	5.174038	7.763593	5.195415	4.315981
ENSRNOG00000011011	Nmb	1:142721002-142724511	1.894925	0.149349	1.022012	0.572268	2.746186	0.944757	0.860118	0.523984	0.385525	5.956213	0.190564	0.643607
XLOC_008236	XLOC_008236	1:142724831-142730175	0.142327	0.000000	0.000000	0.000000	0.000000	0.000000	0.000000	0.060710	0.147329	0.000000	0.118754	0.000000
XLOC_023584	XLOC_023584	1:142729171-142733334	0.119211	0.279688	0.160291	0.213733	0.224170	0.247617	0.077016	0.238234	0.108153	0.260793	0.287430	0.308966
ENSRNOG00000010664	Wdr73	1:142711170-142720257	7.166800	5.637947	8.173891	6.649701	7.849797	8.521939	8.063520	6.629015	7.086112	6.331746	5.248941	6.186209
ENSRNOG00000011029	Sec11a	1:142733434-142759882	15.559497	10.212628	13.535373	11.036152	12.926909	12.449249	13.586743	10.436736	13.091494	12.865814	9.394160	9.832194
ENSRNOG00000011659	Alpk3	1:142883040-142931940	0.488095	0.374318	0.579436	0.438688	0.417912	0.599120	0.434175	0.429648	0.494512	0.320519	0.344994	0.605271
ENSRNOG00000060573	AABR07004437.1	1:142893642-142893953	0.000000	0.000000	0.000000	0.000000	0.000000	0.000000	0.000000	0.000000	0.000000	0.000000	0.000000	0.000000
ENSRNOG00000060206	Zfp592	1:142834157-142870995	8.657465	6.618484	8.278019	6.955508	8.591428	7.657232	7.396156	6.210382	7.531592	7.313201	6.152889	6.824177
ENSRNOG00000051409	RF00405	1:143033756-143145198	0.387419	0.379547	0.253117	0.158974	0.194087	0.281033	0.366659	0.151794	0.305245	0.221995	0.443899	0.464311
ENSRNOG00000019005	Pde8a	1:143036218-143159433	4.144553	4.694358	2.819916	2.155025	3.746869	3.940519	3.584097	1.958784	2.006468	2.669532	4.387223	4.214402
ENSRNOG00000019106	Rps17	1:143167362-143169657	111.749428	74.590706	105.222603	45.462784	97.559227	92.872185	108.697411	49.741421	64.582275	79.373535	73.655556	66.017159
[truncated: 41,207 more rows]
